# Supplementary material for: Highly contorted superhelicene hits near-infrared circularly polarized luminescence
Source: Royal Society of Chemistry journal article supplement (doi:10.1039/d2sc03452b), 2022-01-01
Supplement: d2sc03452b1.pdf [file d2sc03452b1.pdf]

## Electronic supplementary information

# Highly contorted superhelicene hits near-infrared circularly polarized luminescence

Sandra Míguez-Lago,<sup>a</sup> Inês F. A. Mariz,<sup>b</sup> Miguel A. Medel,<sup>a</sup> Juan M. Cuerva,<sup>a</sup> Ermelinda Maçôas,<sup>\*b</sup> Carlos M. Cruz<sup>\*a,c</sup> Araceli G. Campaña<sup>\*a</sup>

- 
- a Dr. S. Míguez-Lago, Dr. M. A. Medel, Prof. J. M. Cuerva, Dr. C. M. Cruz, Dr. A. G. Campaña  
Department of Organic Chemistry, Unidad de Excelencia de Química (UEQ), Faculty of Sciences, University of Granada  
Avda. Fuente Nueva s/n, 18071 Granada (Spain)  
E-mail: [aracelijc@ugr.es](mailto:aracelijc@ugr.es)
- b Dr. I. F. A. Mariz, Dr. E. Maçôas  
Centro de Química Estrutural, Instituto Superior Técnico, Universidade de Lisboa  
Av. Rovisco Pais, 1, 1049-001 Lisboa (Portugal)  
E-mail: [ermelinda.macoas@tecnico.ulisboa.pt](mailto:ermelinda.macoas@tecnico.ulisboa.pt)
- c Dr. C. M. Cruz  
Department of Chemistry, University of Zurich  
Winterthurerstrasse 190, 8057 Zurich (Switzerland)  
E-mail: [carlos.morenocruz@chem.uzh.ch](mailto:carlos.morenocruz@chem.uzh.ch)

## Table of Contents

|                                                                         |    |
|-------------------------------------------------------------------------|----|
| General Details .....                                                   | 3  |
| Synthesis .....                                                         | 4  |
| $^1\text{H}$ , $^{13}\text{C}$ and 2D NMR spectra of new compounds..... | 8  |
| Single Crystal X-Ray Diffraction Structure .....                        | 20 |
| CSP-HPLC traces of compound 1 .....                                     | 26 |
| Optical properties .....                                                | 27 |
| Electrochemistry.....                                                   | 31 |
| Theoretical Calculations .....                                          | 32 |
| Thin Films.....                                                         | 53 |
| References .....                                                        | 60 |

## General Details

Unless otherwise stated, all reagents and solvents were purchased from commercial sources and used without further purification. HPLC grade solvents (hexane,  $\text{CH}_2\text{Cl}_2$ ) were purchased from VWR. Dry toluene,  $\text{CH}_2\text{Cl}_2$  and EtOH were purchased from Scharlau, THF was purchased from Honeywell,  $\text{Ph}_2\text{O}$  was purchased from Apollo Scientific and  $\text{MeNO}_2$  was purchased from TCI. Flash column chromatography was carried out using Silica gel 40-63  $\mu\text{m}$  (230-400 mesh, SILICYCLE, Canada) as the stationary phase. Analytical TLC was performed on aluminium sheets coated with silica gel with fluorescent indicator UV<sub>254</sub> (Sigma-Aldrich) and observed under UV light (254 or 365 nm) and/or stained with phosphomolybdic acid (5% ethanol solution). All  $^1\text{H}$  and  $^{13}\text{C}$  NMR spectra were recorded on Bruker Nanobay Avance III HD 400 MHz, Bruker Avance NEO 400 MHz, Bruker Avance NEO 500 MHz, Varian Direct Drive 500 MHz or Varian Direct Drive 600 MHz spectrometers, at a constant temperature of 298 K. Chemical shifts are reported in ppm and referenced to residual solvent. Coupling constants ( $J$ ) are reported in Hertz (Hz). Standard abbreviations indicating multiplicity were used as follows: m = multiplet, q = quintet, q = quartet, t = triplet, d = doublet, s = singlet, b = broad. Assignment of the  $^{13}\text{C}$  NMR signals was accomplished by DEPT, HSQC and HMBC techniques. ESI-TOF mass spectra were recorded on a Waters XEVO GL-XS QToF mass spectrometer. IR-ATR spectra were recorded on a Perkin Elmer Spectrum Two IR Spectrometer. Melting points were measured on a Stuart SMP3. Chiral stationary phase (CSP-HPLC) resolution of compound **1** was accomplished using a semipreparative Chiralpak® IA column (particle size 5  $\mu\text{m}$ , dimensions 10 mm diameter  $\times$  250 mm length) from Daicel Chiral Technologies (*n*-Hex:DCM 8:2, flow = 3.8 mL min<sup>-1</sup>). Cyclic Voltammetry (CV) and Square Wave Voltammetry (SWV) were carried out on a PGSTAT2014 potentiostat/galvanostat (Metrohm Autolab B. V.) with a three electrode cell under Ar atmosphere at 25°C. A Pt-wire counterelectrode, an Ag wire quasireference electrode and a glassy carbon disk working electrode were used. Freshly distilled THF was used as solvent to prepare a 0.1 M solution of tetra-*n*-butylammonium hexafluorophosphate (TBAPF<sub>6</sub>) which was used as work solution. The scan rate was 0.05 V/s. Potential values are referred to the ferrocenium/ferrocene ( $\text{Fc}^+/\text{Fc}$ ) system, Fc was added as an internal reference after each measurement. Films formed via spin-coating were obtained using a Laurell Technologies Corporation spin-coater (Model WS-400BZ-6NPP/LITE). As substrates for the thin film formation, quartz microscope slides from Thermo Scientific (76  $\times$  26 mm) were used. For optical characterization of macrohelicene films Optical Microscopy (OM) OLYMPUS BX51 was used, with the following configuration: Microscope stand BX51. Lenses: 2x (Apo), 4x, 10x, 20x, 40x (Plan Fluor), 60x and immersion 100x (Plan Fluor). Photographic system PM10SP1. Digital camera DP50, effective resolution 2.776 $\times$ 2.074 pixels. Prism DIC for transmitted light, DIC analyzer, DIC prisms for PF 20x, 40x, 60x and 100x. For morphological study of nanostructured macrohelicene films Tapping-mode Atomic Force Microscopy (AFM) NX20 (Park Systems) was employed. Motorized slide (XY: 150 mm; Z: 25 mm); vacuum sample immobilization and multisample slide up to 16 samples. XY scanner: XY simple flexion module scanner with closed loop controller. Coupled optical microscopy window (842  $\times$  631  $\mu\text{m}^2$ ). Scanning range: 100  $\mu\text{m}$   $\times$  100 $\mu\text{m}$ . 20-bit position controller and 24-bit position sensor. Z scanner: Z-stacked piezoelectric scanner with high guided force. Scanning range: 15  $\mu\text{m}$ . 20-bit position controller and 24-bit position sensor. Lenses: 10 $\times$  (0.21 NA) for extra-long working distance. Lens on sample surface vision axis and cantilever (ACTA, tapping mode, Set point = 14.379E3 nm, Amplitude = 28.048E3 nm, Sel. Frequency = 290.48E3 Hz, Scan rate = 0.6 Hz, unless otherwise specified). Coupled with 10x lens: 840  $\times$  630  $\mu\text{m}$ . CCD: 5M pixel. Glassware and quartz plates used as substrate in the thin film formation were sonicated in acetone for 5 min, then with isopropanol for 5 min, and finally dried with Ar flow while heated with the heatgun.

## Synthesis

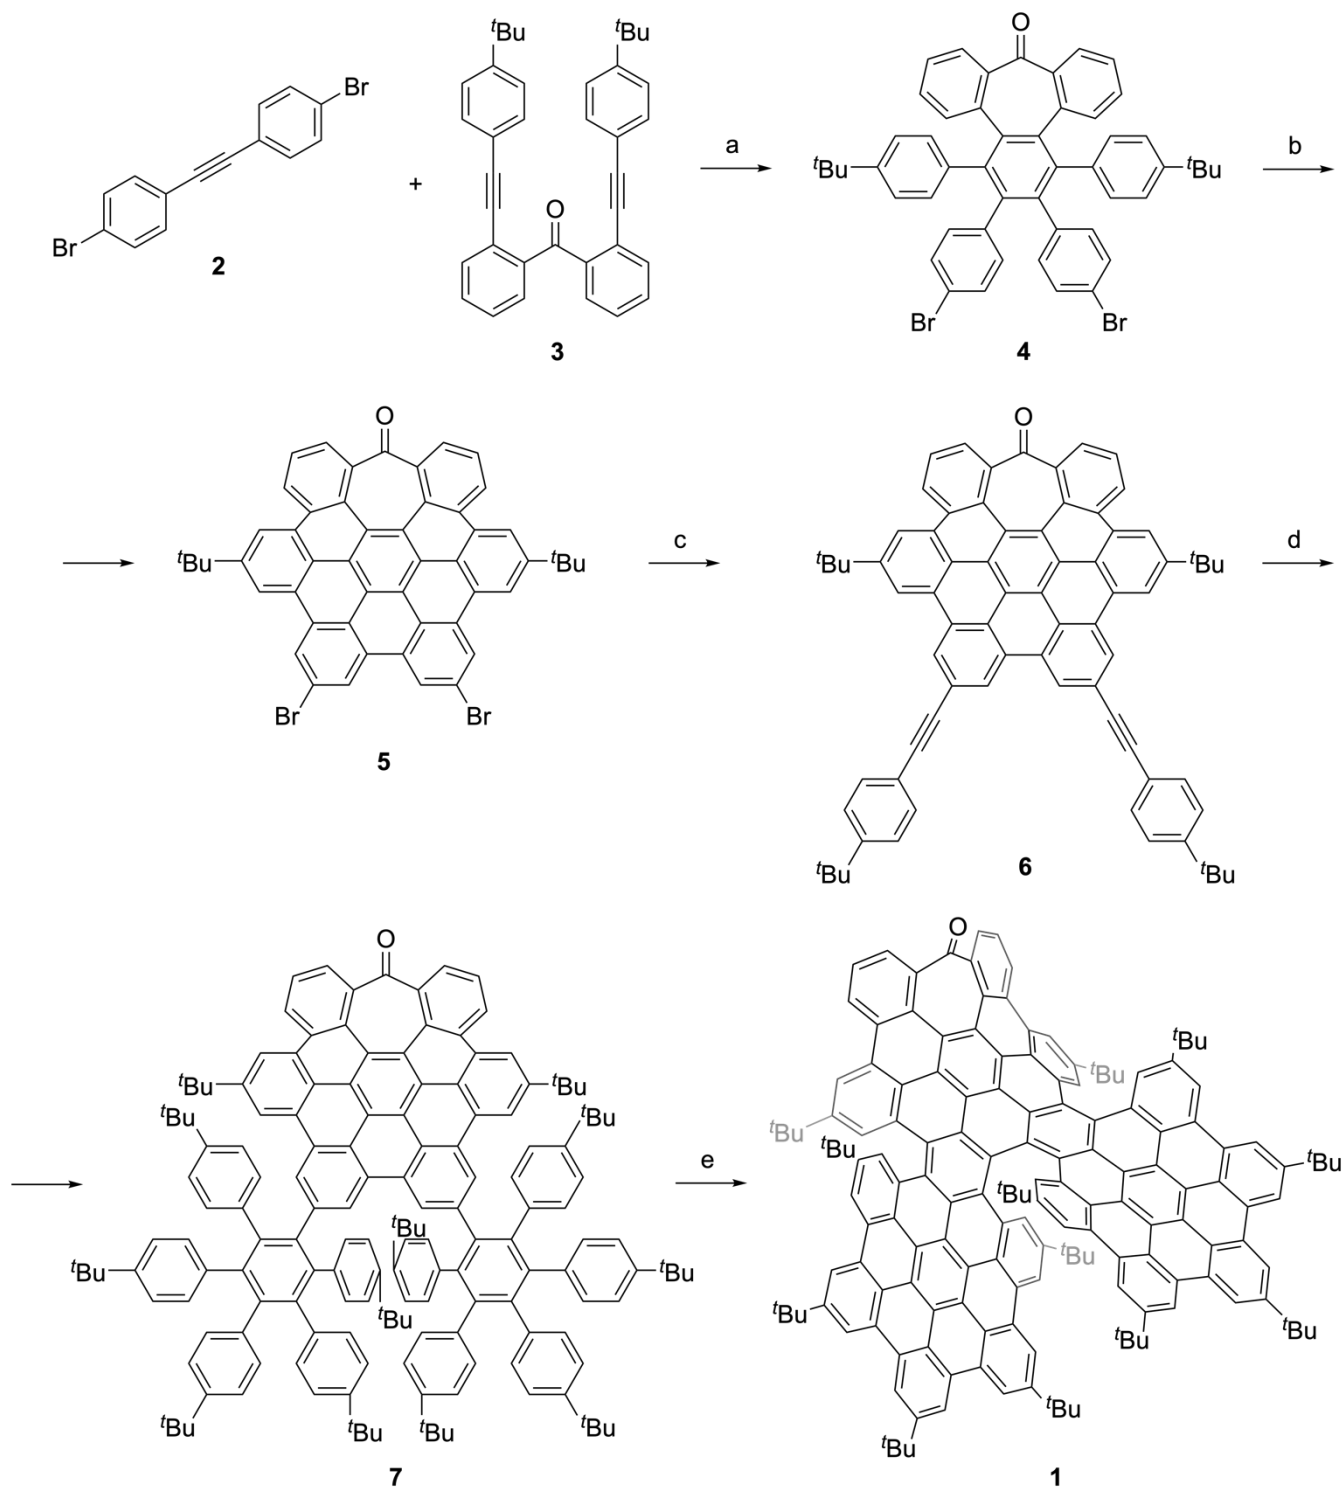

**Scheme S1.** Synthesis of compound **1**. Compounds **2** and **3** were prepared according to literature procedures.<sup>51,52</sup> a)  $\text{Co}_2(\text{CO})_8$ , toluene, 110°C, 16 h, 20%; b) DDQ,  $\text{CF}_3\text{SO}_3\text{H}$ ,  $\text{CH}_2\text{Cl}_2$ , 0°C, 10 min, 83%; c) 4-*tert*-butylphenylacetylene,  $\text{PdCl}_2(\text{PPh}_3)_2$ , CuI,  $\text{Et}_3\text{N}$ , THF, r.t., 16 h, 65%; d) 2,3,4,5-tetrakis(4-*tert*-butylphenyl)cyclopentadienone,  $\text{Ph}_2\text{O}$ , 259°C, 23%; e) DDQ,  $\text{CF}_3\text{SO}_3\text{H}$ ,  $\text{CH}_2\text{Cl}_2$ , 0°C, 10 min, 50%. (*M,M,P*)-**1** enantiomer is shown.

#### Compound 4

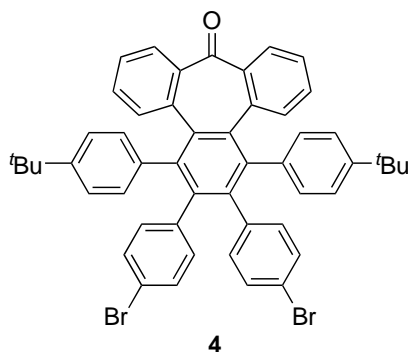

In a glovebox, compound **3** (350 mg, 0.71 mmol) and  $\text{Co}_2(\text{CO})_8$  (315 mg, 0.92 mmol) were placed in a round bottom flask and capped properly, the solids were dissolved in dry toluene (6 mL) and the reaction mixture placed in an oil bath at  $110^\circ\text{C}$  for 30 min. Then a degassed suspension of **2** (350 mg, 1.04 mmol) in dry toluene (2 mL) was added dropwise over the reaction mixture and the resulting solution was stirred at  $110^\circ\text{C}$  overnight. The solvent was removed in the rotavapor and the crude material purified by flash column chromatography ( $\text{SiO}_2$ , hexane/ $\text{CH}_2\text{Cl}_2$ , 7:3) affording **4** (120 mg, 20%) as a white solid.  $^1\text{H}$  NMR (500 MHz,  $\text{CD}_2\text{Cl}_2$ ):  $\delta$  = 7.35 (d,  $J$ =7.5, 2H), 7.25 (d,  $J$ =8.1, 2H), 7.21 (d,  $J$ =7.9, 2H), 7.09 (t,  $J$ =7.4, 2H), 7.03 (s, 4H), 6.93 (d,  $J$ =7.7, 2H), 6.84 (t,  $J$ =7.9, 4H), 6.79 (t,  $J$ =7.6, 2H), 6.36 (d,  $J$ =8.0, 2H), 6.32 (d,  $J$ =7.9, 2H), 1.17 (s, 14H).  $^{13}\text{C}$  NMR (126 MHz,  $\text{CD}_2\text{Cl}_2$ ):  $\delta$  = 200.04 (C), 149.30 (C), 146.48 (C), 141.78 (C), 141.46 (C), 139.86 (C), 137.71 (C), 136.45 (C), 135.09 (C), 133.72 (CH), 133.29 (CH), 132.66 (CH), 132.54 (CH), 130.45 (CH), 129.80 (CH), 128.75 (CH), 127.39 (CH), 124.54 (CH), 124.45 (CH), 123.97 (CH), 120.10 (C), 34.52 (C), 31.33 ( $\text{CH}_3$ ). HR-MS (ESI-TOF):  $m/z$  calcd. for  $\text{C}_{51}\text{H}_{42}\text{Br}_2\text{NaO}$  [ $\text{M}+\text{Na}$ ] $^+$ : 853.1480, found: 853.1503. IR (ATR): 3067, 3033, 3961, 3904, 3866, 1907, 1781, 1684  $\text{cm}^{-1}$ .

#### Compound 5

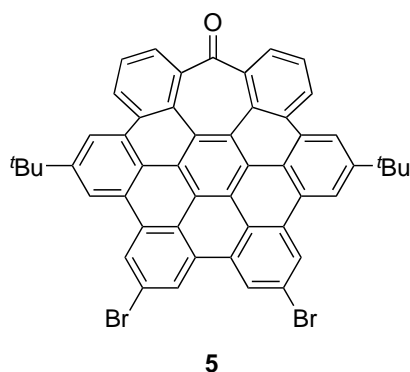

To a solution of polyphenylene **4** (110 mg, 0.13 mmol) and DDQ (170 mg, 0.75 mmol) in dry  $\text{CH}_2\text{Cl}_2$  (6 mL) placed in an ice-water bath, then trifluoromethanesulfonic acid (0.15 mL) was slowly added and the reaction mixture stirred for 10 min under Ar atmosphere. The mixture was then diluted with  $\text{CH}_2\text{Cl}_2$  (10 mL) and silica gel was added. The solvent was removed in the rotavapor and the crude material purified by flash column chromatography ( $\text{SiO}_2$ , hexane/ $\text{CH}_2\text{Cl}_2$ , 3:2) giving rise to **5** (89 mg, 83%) as a yellow solid.  $^1\text{H}$  NMR (400 MHz,  $\text{CDCl}_3$ )  $\delta$  = 8.79 (dd,  $J$  = 8.7, 1.5 Hz, 2H), 8.76 (dd,  $J$  = 7.9, 1.7 Hz, 4H), 8.68 (dd,  $J$  = 6.1, 1.7 Hz, 4H), 7.84 (dd,  $J$  = 7.2, 1.4 Hz, 2H), 7.73 (t,  $J$  = 7.7 Hz, 2H), 1.68 (s, 18H) ppm.  $^{13}\text{C}$  NMR (126 MHz,  $\text{CDCl}_3$ ): 202.2, 150.3, 142.5, 132.3, 131.2, 130.4, 128.4, 128.2, 127.7, 127.1, 126.3, 125.2, 125.1, 124.4, 124.3, 123.3, 123.2, 122.9, 122.3, 121.0, 120.2, 119.1, 35.8, 32.0 ppm. HR-MS (ESI-TOF):  $m/z$  calcd. for :  $\text{C}_{51}\text{H}_{32}\text{Br}_2\text{NaO}$  [ $\text{M}+\text{Na}$ ] $^+$ ; 843.0697, found: 843.0745. IR (ATR): 2956, 2925, 2855, 1725, 1681, 1576  $\text{cm}^{-1}$ .

## Compound 6

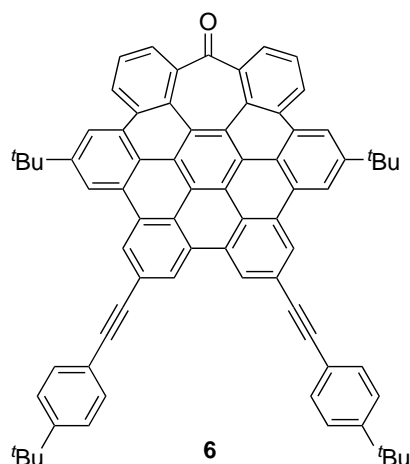

Compound **5** (270 mg, 0.33 mmol), Pd(PPh<sub>3</sub>)<sub>4</sub> (50 mg, 0.04 mmol) and CuI (15 mg, 0.08 mmol) were placed into a round bottom flask, capped properly and purged with Ar. The solids were suspended with a mixture of freshly distilled THF (2 mL) and NEt<sub>3</sub> (4 mL) and bubbled with Ar. The reaction mixture was placed at 70°C and *p*-*tert*-butylphenylacetylene (0.18 mL, 0.99 mmol) was added dropwise. The reaction mixture was kept at this temperature for 16 h. Once cooled to room temperature, the crude was diluted with CH<sub>2</sub>Cl<sub>2</sub> (100 mL) and washed with NH<sub>4</sub>Cl<sub>(sat)</sub> (2 × 100 mL). The organic layer was separated, dried with anhydrous Na<sub>2</sub>SO<sub>4</sub>, filtered and the solvent removed at the rotavapor. The crude was purified by flash column chromatography (SiO<sub>2</sub>, hexane/CH<sub>2</sub>Cl<sub>2</sub>, 1:1) affording **6** (208 mg, 65%) as a yellow solid. <sup>1</sup>H NMR (500 MHz, CD<sub>2</sub>Cl<sub>2</sub>): δ = 8.69 (s, 2H), 8.54 (s, 2H), 8.49 (s, 2H), 8.44 (d, *J*=7.7, 2H), 8.27 (s, 1H), 7.67 (d, *J*=7.2, 2H), 7.52 (d, *J*=8.0, 4H), 7.40 (d, *J*=8.0, 4H), 7.33 (t, *J*=7.1, 2H), 1.68 (s, 9H), 1.33 (s, 9H). <sup>13</sup>C NMR (126 MHz, CD<sub>2</sub>Cl<sub>2</sub>): δ = 202.37 (C), 152.13 (C), 150.06 (C), 142.45 (C), 131.95 (CH), 131.12 (C), 130.49 (C), 129.05 (C), 129.00 (C), 128.34 (C), 127.32 (C), 127.00 (C), 125.93 (CH), 124.89 (C), 124.71 (CH), 124.28 (CH), 124.04 (CH), 123.70 (C), 123.11 (C), 123.09 (C), 122.24 (C), 121.12 (CH), 120.64 (C), 120.39 (C), 118.91 (CH), 90.92 (C), 89.74 (C), 35.94 (C), 35.13 (C), 32.12 (CH<sub>3</sub>), 31.36 (CH<sub>3</sub>). HR-MS (MALDI dctb + PPG790): *m/z* calcd. for C<sub>75</sub>H<sub>58</sub>O [M]<sup>+</sup>: 974.4488, found: 974.4482. IR (ATR): 3076, 3036, 2956, 2904, 2866, 1913, 1740, 1678, 1609, 1584 cm<sup>-1</sup>.

## Compound 7

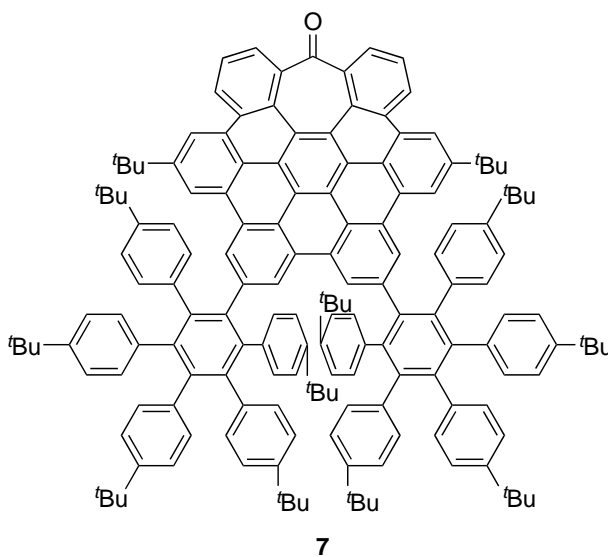

A solution of **6** (67 mg, 68.70 μmol) and 2,3,4,5-tetrakis-(*p*-*tert*-butyl-phenyl)-cyclopentadienone (84 mg, 137.4 μmol) in Ph<sub>2</sub>O (2 mL) was placed in a sand bath and refluxed overnight. The reaction mixture was cooled down to room temperature, diluted with hexane (10 mL) and purified by flash column chromatography (SiO<sub>2</sub>, hexane/CH<sub>2</sub>Cl<sub>2</sub>, 3:2) giving rise to **7** (44 mg, 30%) as a glassy yellow solid. <sup>1</sup>H NMR (500 MHz, CD<sub>2</sub>Cl<sub>2</sub>): δ = 8.62 (d, *J*=7.7, 2H), 8.49 (s, 2H), 8.32 (s, 5H), 7.92 (s, 2H), 7.62 (d, *J*=7.0, 2H), 7.54 (t, *J*=7.5, 2H), 7.05 (d, *J*=7.9, 4H), 6.99 – 6.90 (m, 14H), 6.89 – 6.78 (m, 17H), 6.75 (d, *J*=7.9, 4H), 6.61 (d, *J*=7.8, 4H), 1.54 (s, 18H), 1.17 (s, 18H), 1.16 (s, 36H), 0.69 (s, 36H). <sup>13</sup>C NMR (126 MHz, CD<sub>2</sub>Cl<sub>2</sub>): δ = 202.64 (C), 149.99 (C), 148.46 (C), 148.38 (C), 148.35 (C), 142.49 (C), 141.61 (C), 141.36 (C), 141.04 (C), 140.36 (C), 140.00 (C), 138.62 (C), 138.60 (C), 138.36 (C), 131.89 (CH), 131.81 (CH), 131.57 (CH), 131.50 (CH), 131.42 (CH), 129.78 (C), 129.50 (C), 128.79 (C), 128.44 (C), 127.56 (CH), 127.36 (C), 127.05 (CH), 126.90 (CH), 126.22 (CH), 124.49 (C), 123.80 (CH), 123.71 (CH), 123.13 (C), 123.03 (C), 122.28 (C), 121.06 (C), 120.57 (CH), 117.88 (CH), 35.74 (C), 34.46 (C), 34.13 (C), 31.96 (CH<sub>3</sub>), 31.40 (CH<sub>3</sub>), 31.00 (CH<sub>3</sub>). HR-MS (ESI-TOF): *m/z* calcd. for C<sub>163</sub>H<sub>162</sub>NaO [M+Na]<sup>+</sup>: 2159.2557, found: 2159.2610. IR (ATR): 3089, 3058, 3026, 2954, 2904, 2866, 1687, 1609, 1587, 1511 cm<sup>-1</sup>.

## Compound 1

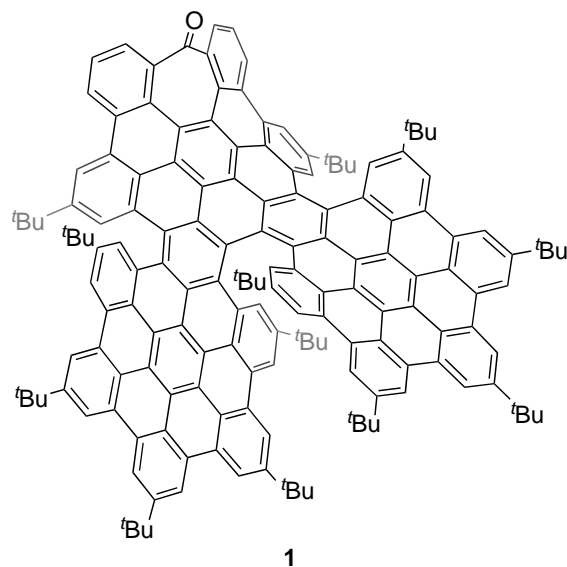

In a round bottom flask, compound **7** (34 mg, 16  $\mu$ mol) and DDQ (50 mg, 0.22 mmol) were purged with Ar and dissolved with dry  $\text{CH}_2\text{Cl}_2$  (6 mL). The reaction mixture was placed in an ice-water bath and trifluoromethanesulfonic acid (0.15 mL) were added dropwise and stirred for 10 min. The mixture was diluted with  $\text{CH}_2\text{Cl}_2$  (10 mL), silica gel was added and the solvent removed under vacuo. The crude material was purified by flash column chromatography ( $\text{SiO}_2$ ,  $\text{CH}_2\text{Cl}_2$ /hexane, 3:2) affording **1** as a dark green solid in a 50% yield. (*M,M,P/P,P,M*)-**1**:  $^1\text{H NMR}$  (500 MHz,  $\text{CD}_2\text{Cl}_2$ ):  $\delta$  = 9.71 (s, 1H), 9.48 – 9.22 (m, 13H), 9.15 (d,  $J=6.7$ , 3H), 9.01 (s, 1H), 8.84 (s, 1H), 8.78 (s, 1H), 8.49 (s, 1H), 8.29 – 8.04 (m, 7H), 8.00 (s, 1H), 7.68 (s, 1H), 1.94 (s, 9H), 1.90 (s, 18H), 1.89 (s, 9H), 1.59 (s, 9H), 1.55 (s, 9H), 1.45 (s, 9H), 1.43 (s, 9H), 1.41 (s, 9H), 0.13 (s, 9H), -0.26 (s, 9H). HR-MS (ESI-TOF):  $m/z$  calc. for  $\text{C}_{163}\text{H}_{139}\text{O}$  [ $\text{M}+\text{H}$ ] $^+$ : 2112.0781; found: 2112.0757. (*M,M,M/P,P,P*)-**1**:  $^1\text{H NMR}$  (500 MHz,  $\text{CD}_2\text{Cl}_2$ ):  $\delta$  = 9.61 (s, 2H), 9.47 (s, 2H), 9.46 – 9.41 (m, 6H), 9.33 (s, 2H), 9.31 – 9.26 (m, 4H), 9.17 (s, 2H), 8.93 (s, 2H), 8.45 (s, 2H), 8.23 (s, 2H), 8.15 – 8.02 (m, 4H), 7.93 (s, 2H), 1.92 (s, 18H), 1.86 (s, 18H), 1.50 (s, 18H), 1.49 (s, 18H), 1.31 (s, 18H), -0.22 (s, 18H). HR-MS (ESI-TOF):  $m/z$  calc. for  $\text{C}_{163}\text{H}_{138}\text{O}$  [ $\text{M}$ ] $^+$ : 2111.0748; found: 2111.0757. IR (ATR): 3076, 2955, 2924, 2855, 1734, 1681, 1602, 1579  $\text{cm}^{-1}$ .

$^1\text{H}$ ,  $^{13}\text{C}$  and 2D NMR spectra of new compounds

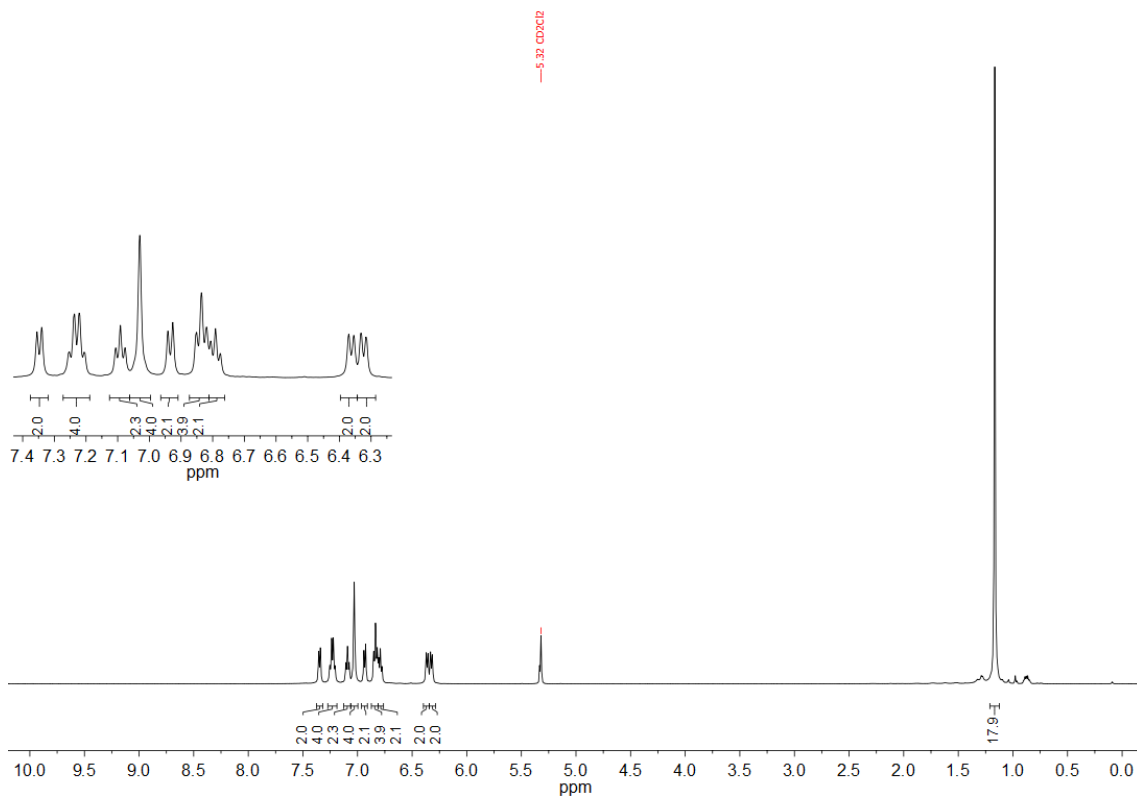

Figure S1.  $^1\text{H}$  NMR (400 MHz,  $\text{CD}_2\text{Cl}_2$ ) spectrum of compound 4.

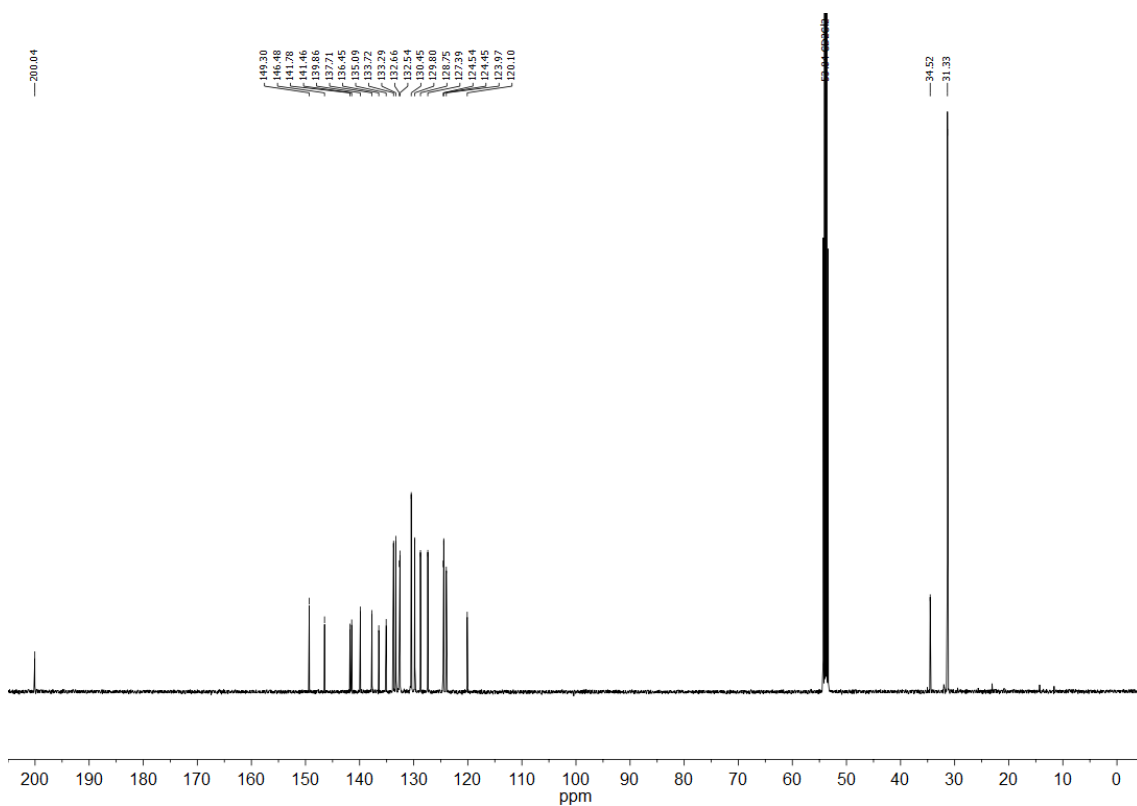

Figure S2.  $^{13}\text{C}$  NMR (126 MHz,  $\text{CDCl}_3$ ) spectrum of compound 4.



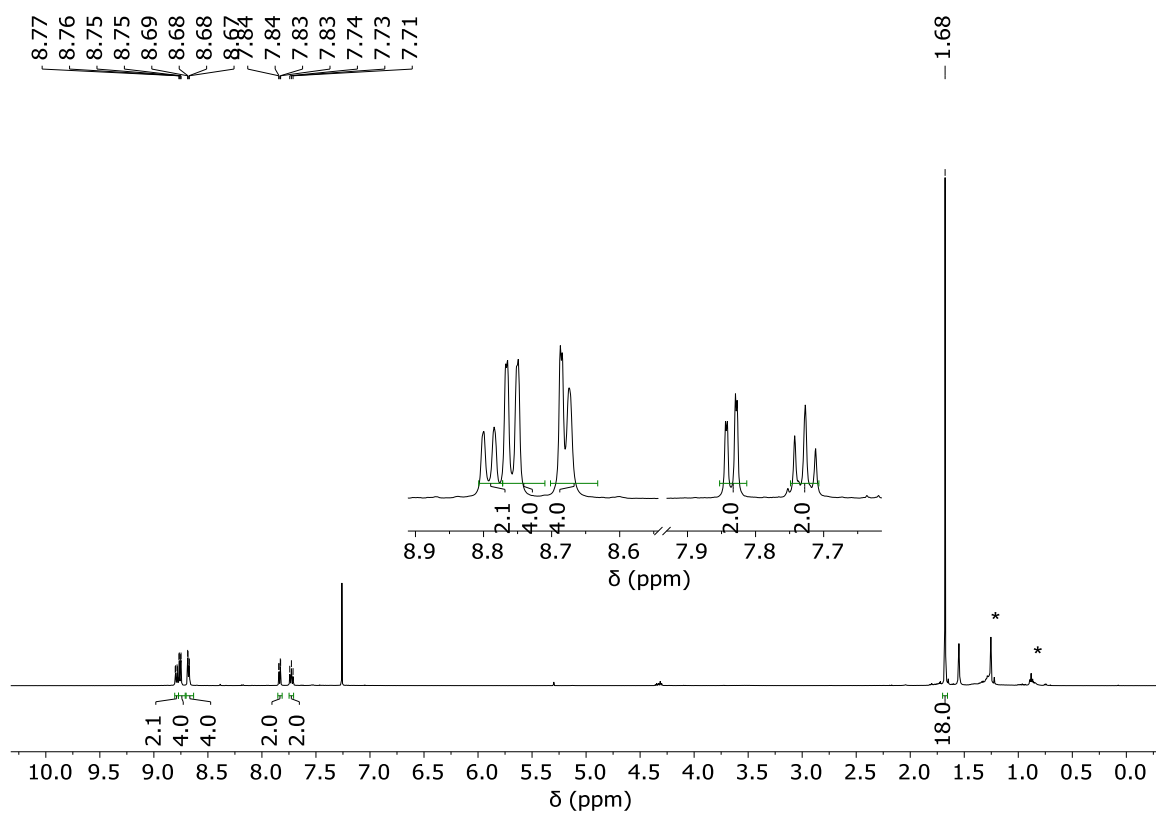

Figure S3.  $^1\text{H}$  NMR (500 MHz,  $\text{CDCl}_3$ ) spectrum of compound 5.

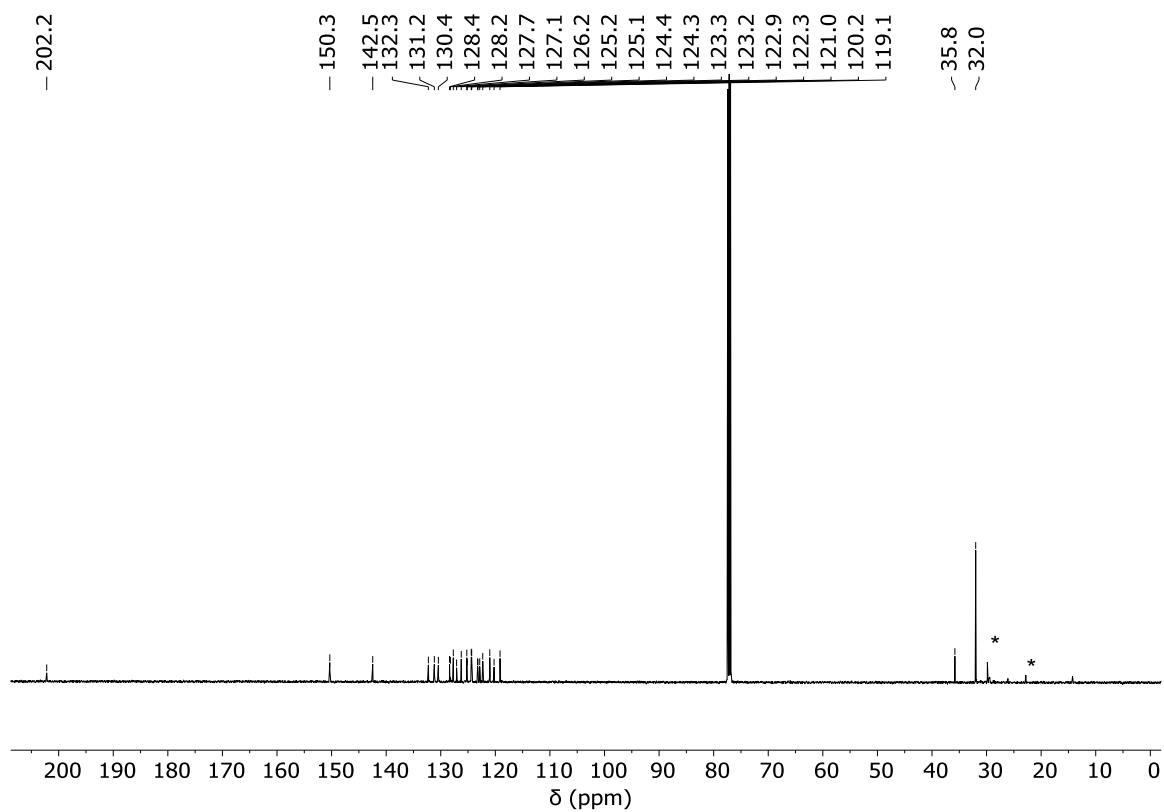

Figure S4.  $^{13}\text{C}$  NMR (126 MHz,  $\text{CDCl}_3$ ) spectrum of compound 5.

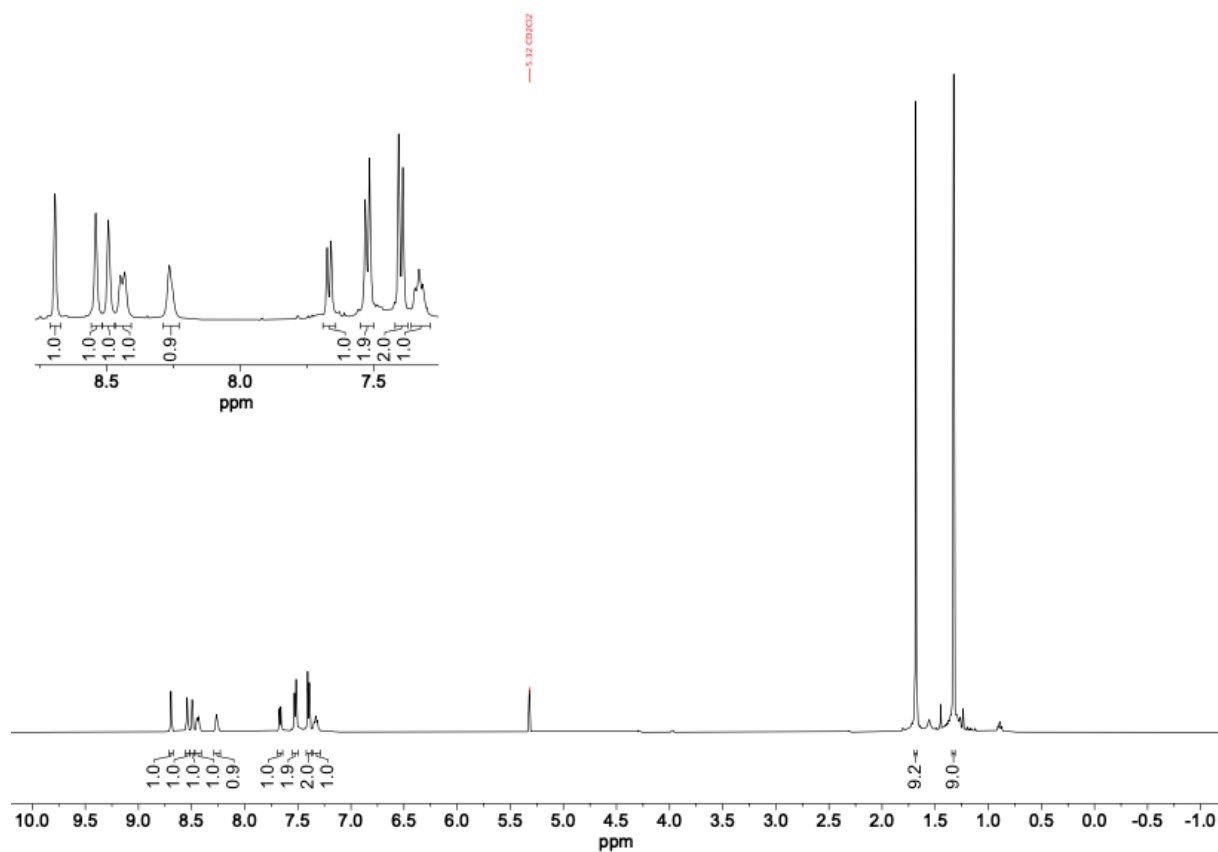

Figure S5.  $^1\text{H}$  NMR (500 MHz,  $\text{CD}_2\text{Cl}_2$ ) spectrum of compound 6.

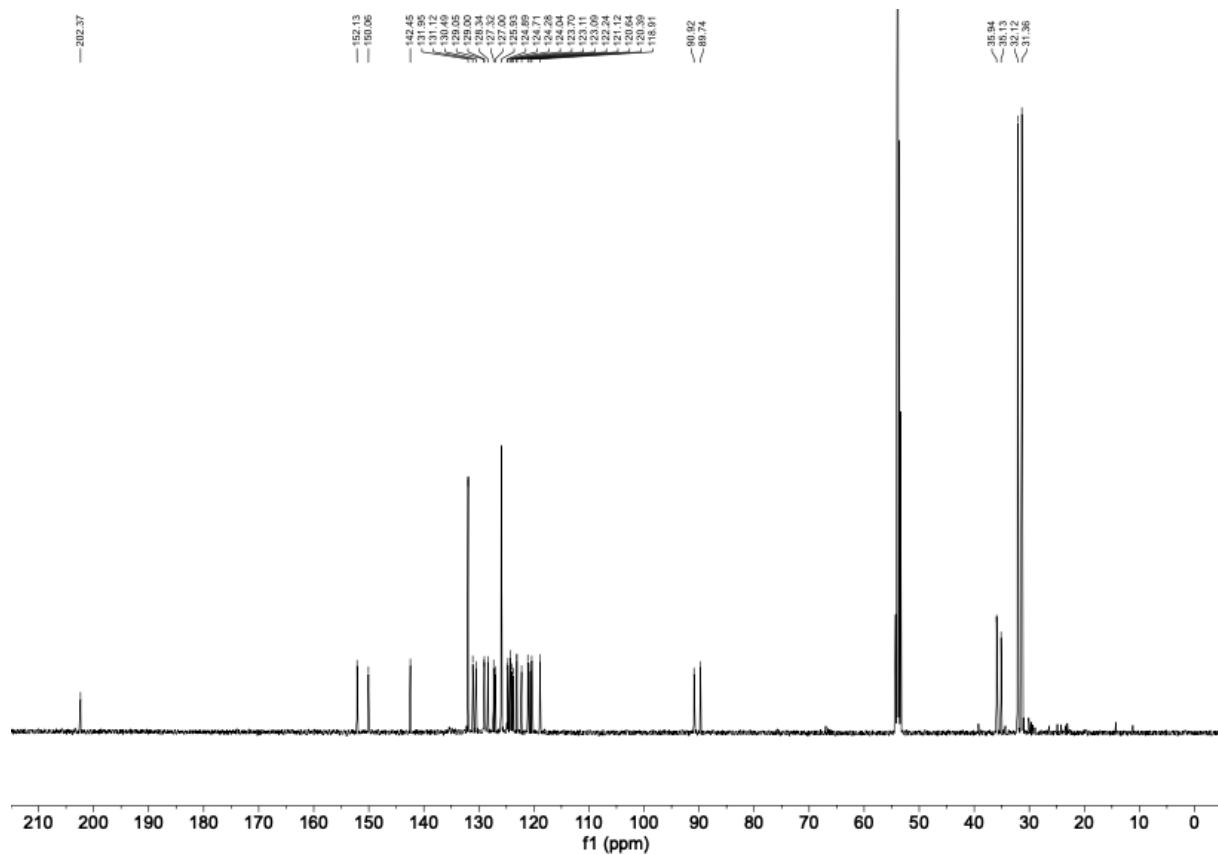

Figure S6.  $^{13}\text{C}$  NMR (126 MHz,  $\text{CD}_2\text{Cl}_2$ ) spectrum of compound 6.

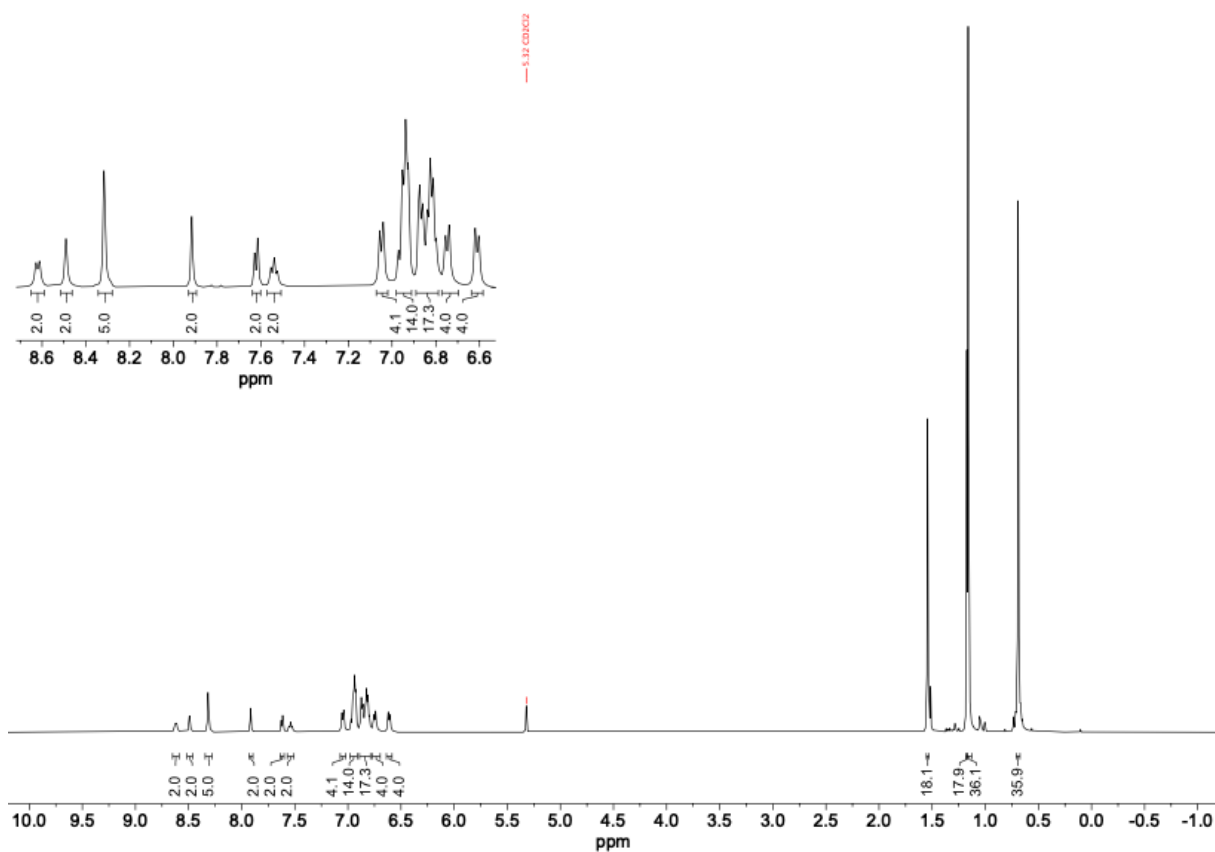

Figure S7.  $^1\text{H}$  NMR (500 MHz,  $\text{CD}_2\text{Cl}_2$ ) spectrum of compound 7.

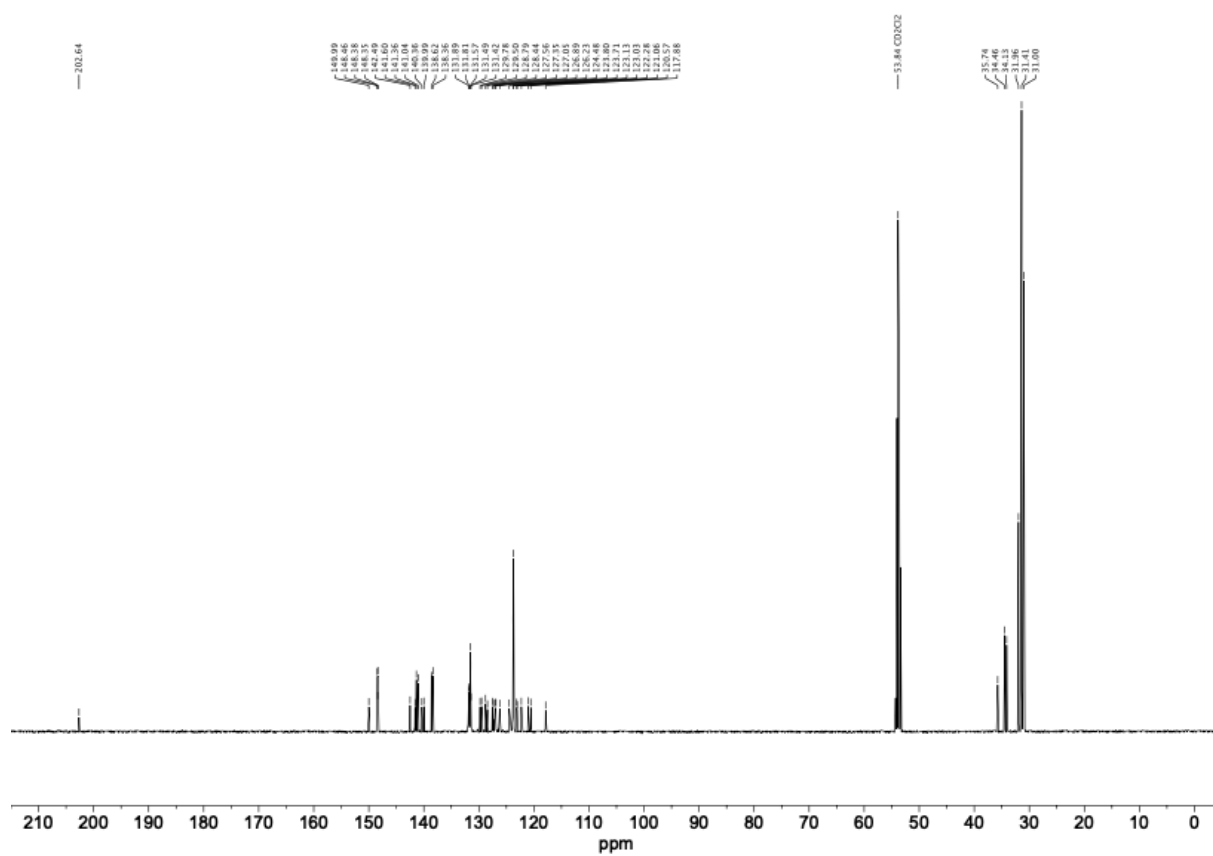

Figure S8.  $^{13}\text{C}$  NMR (126 MHz,  $\text{CD}_2\text{Cl}_2$ ) spectrum of compound 7.

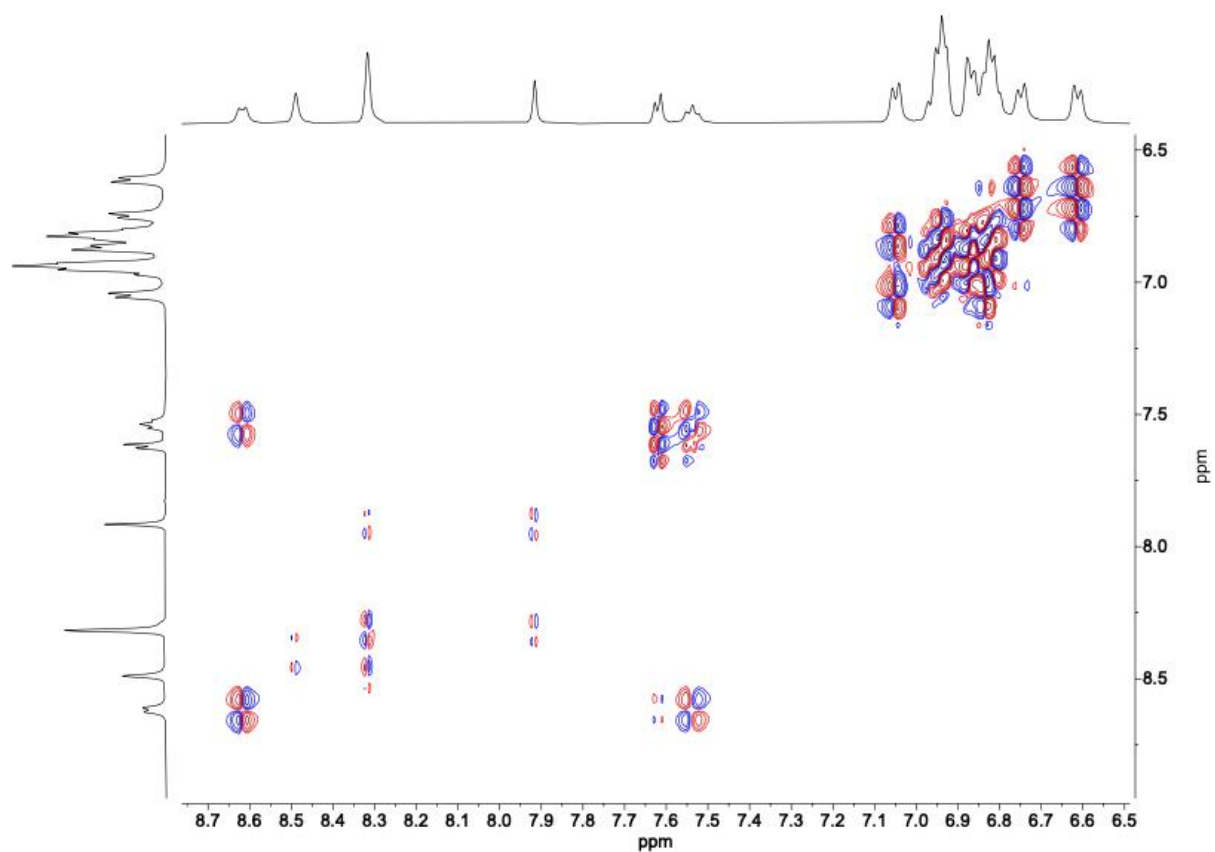

Figure S9.  $^1\text{H}$ - $^1\text{H}$  COSY (500 MHz,  $\text{CD}_2\text{Cl}_2$ ) spectrum of compound 7.

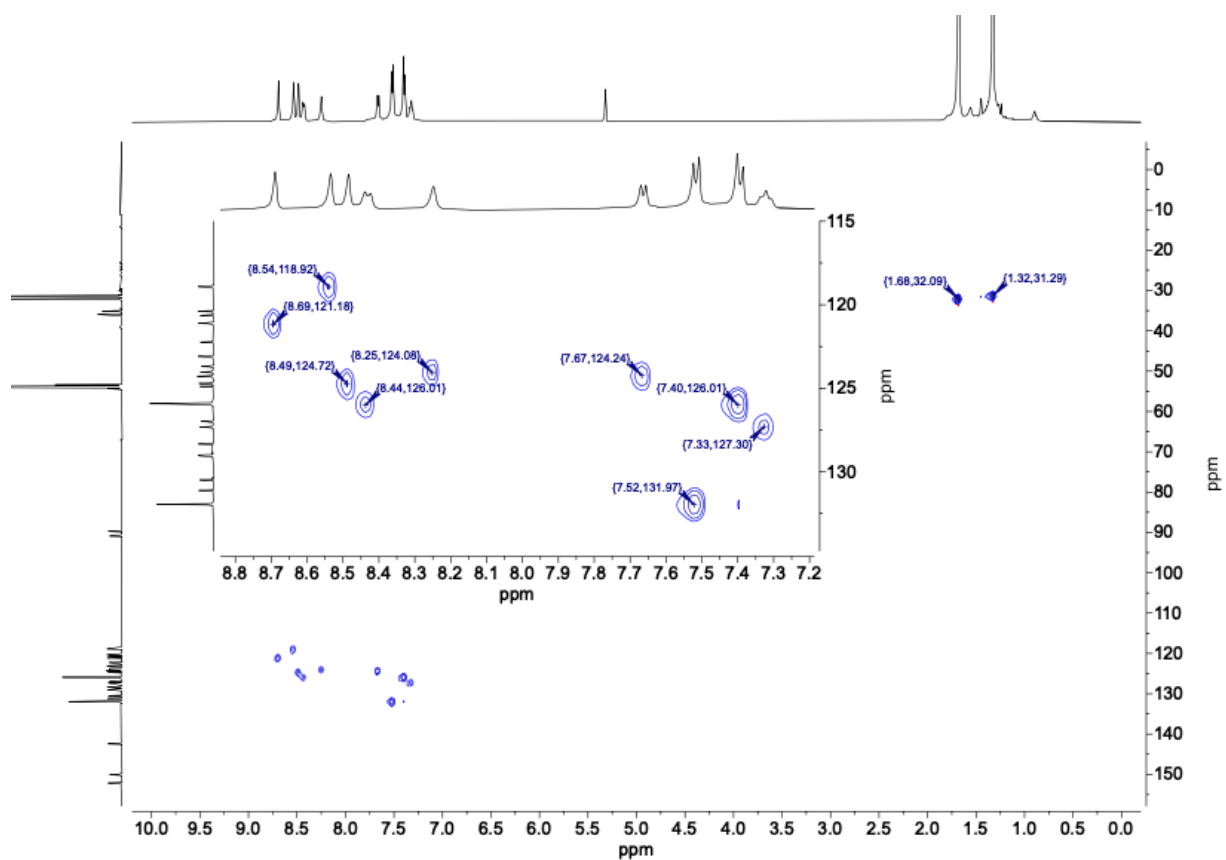

Figure S10.  $^1\text{H}$ - $^{13}\text{C}$  HSQC (500 MHz, 126 MHz,  $\text{CD}_2\text{Cl}_2$ ) spectrum of compound 7.

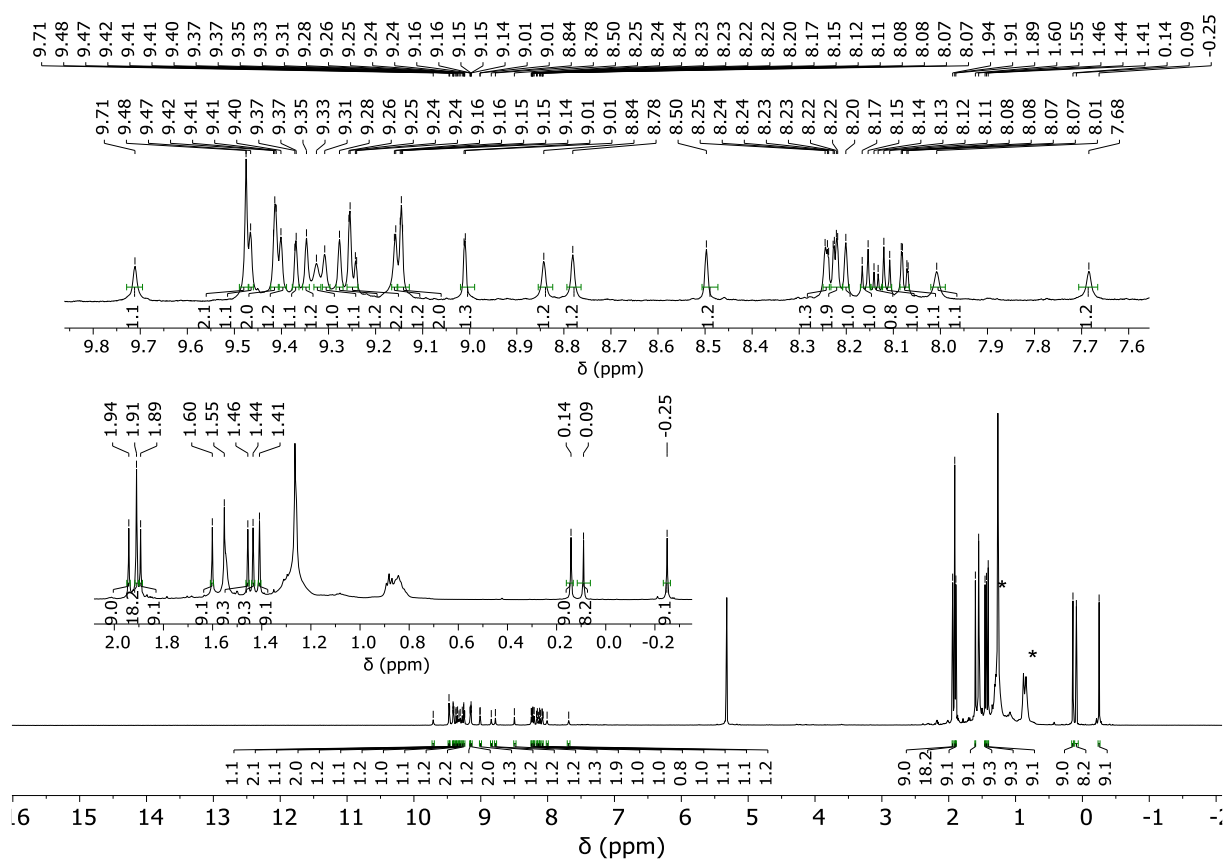

Figure S11.  $^1\text{H}$  NMR (400 MHz,  $\text{CD}_2\text{Cl}_2$ ) spectrum of compound  $(P,P,M)$ -1. \* Grease traces.

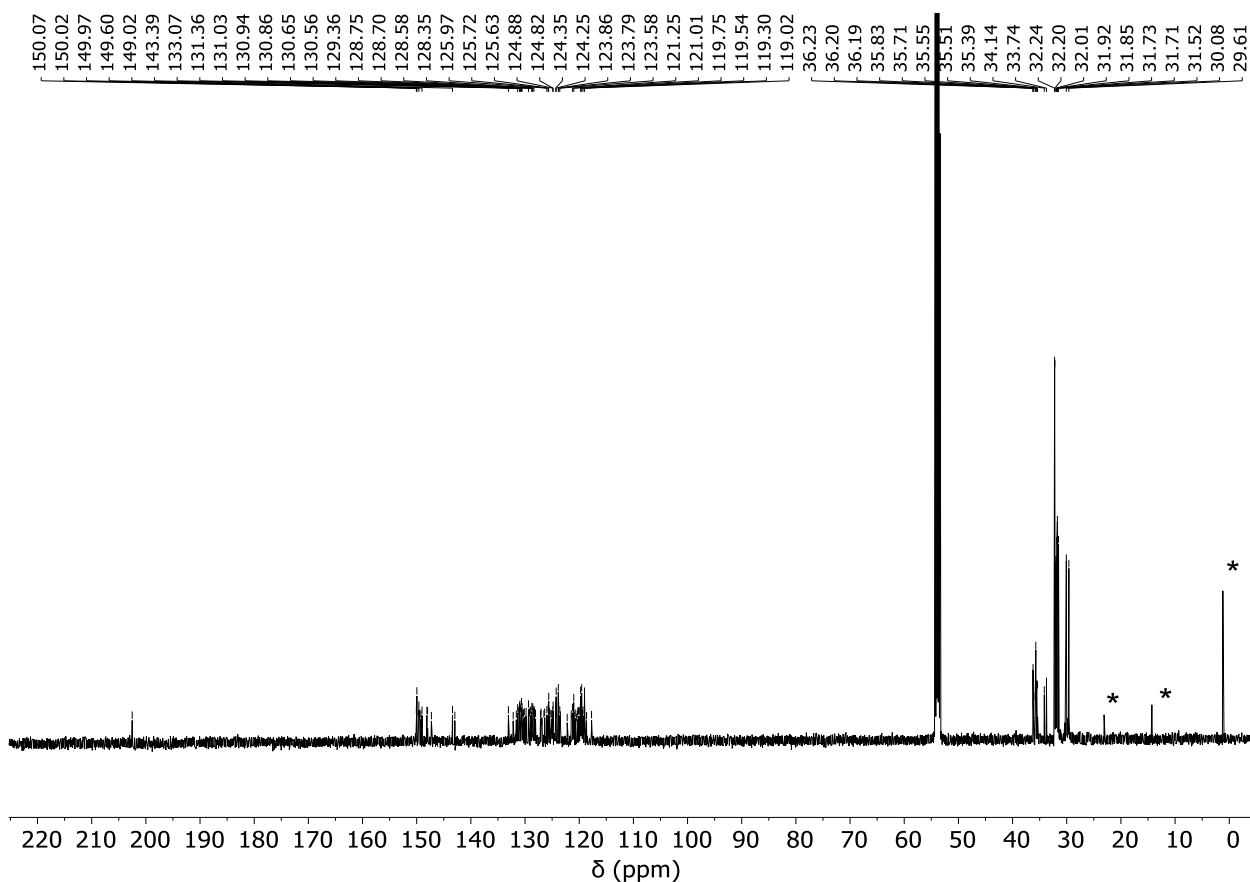

Figure S12.  $^{13}\text{C}$  NMR (101 MHz,  $\text{CD}_2\text{Cl}_2$ ) spectrum of compound  $(P,P,M)$ -1. \* Grease traces.

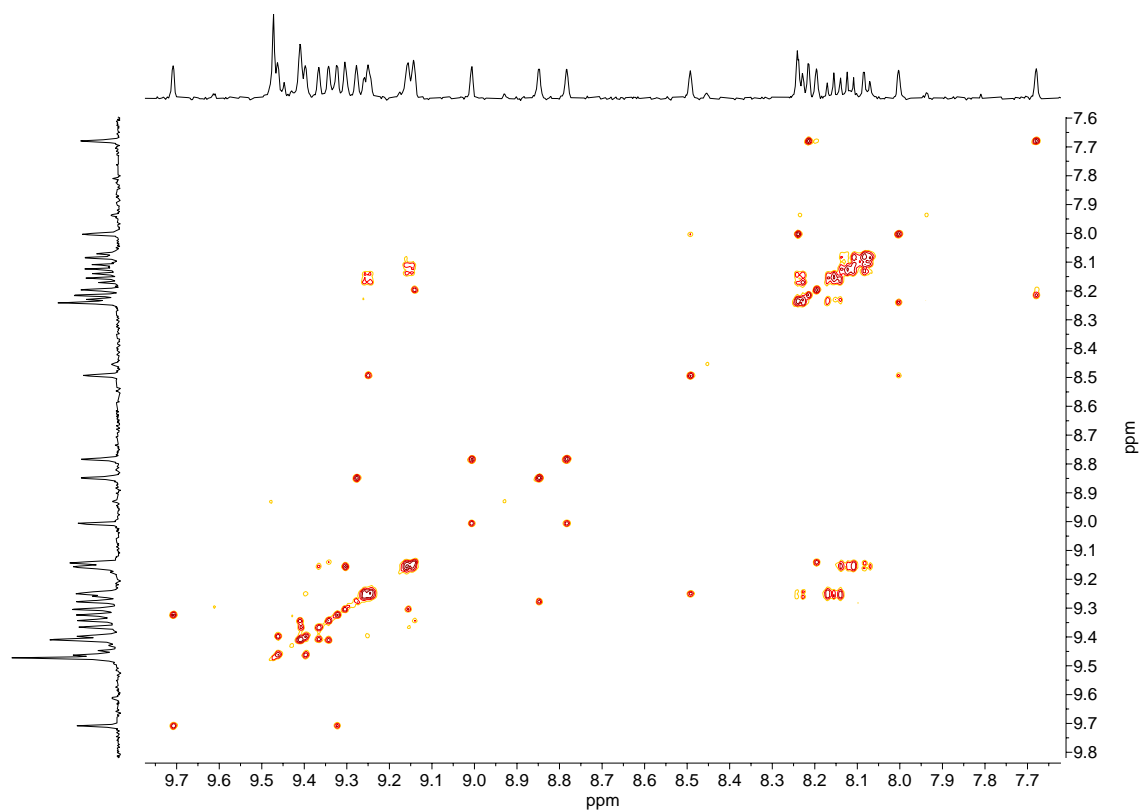

Figure S13. Partial  $^1\text{H}$ - $^1\text{H}$  COSY (500 MHz,  $\text{CD}_2\text{Cl}_2$ ) spectrum of compound (P,P,M)-1.

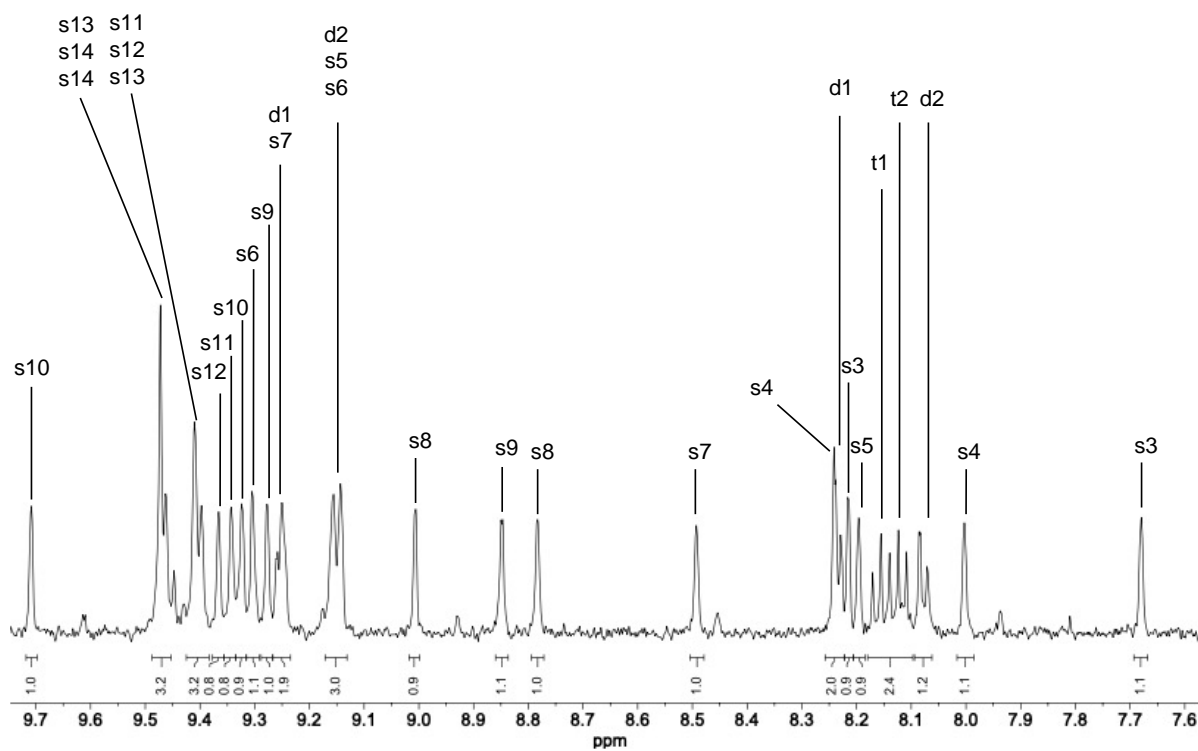

Figure S14. Partial  $^1\text{H}$  NMR (500 MHz,  $\text{CD}_2\text{Cl}_2$ ) spectrum showing the coupling systems observed in Figure S13.

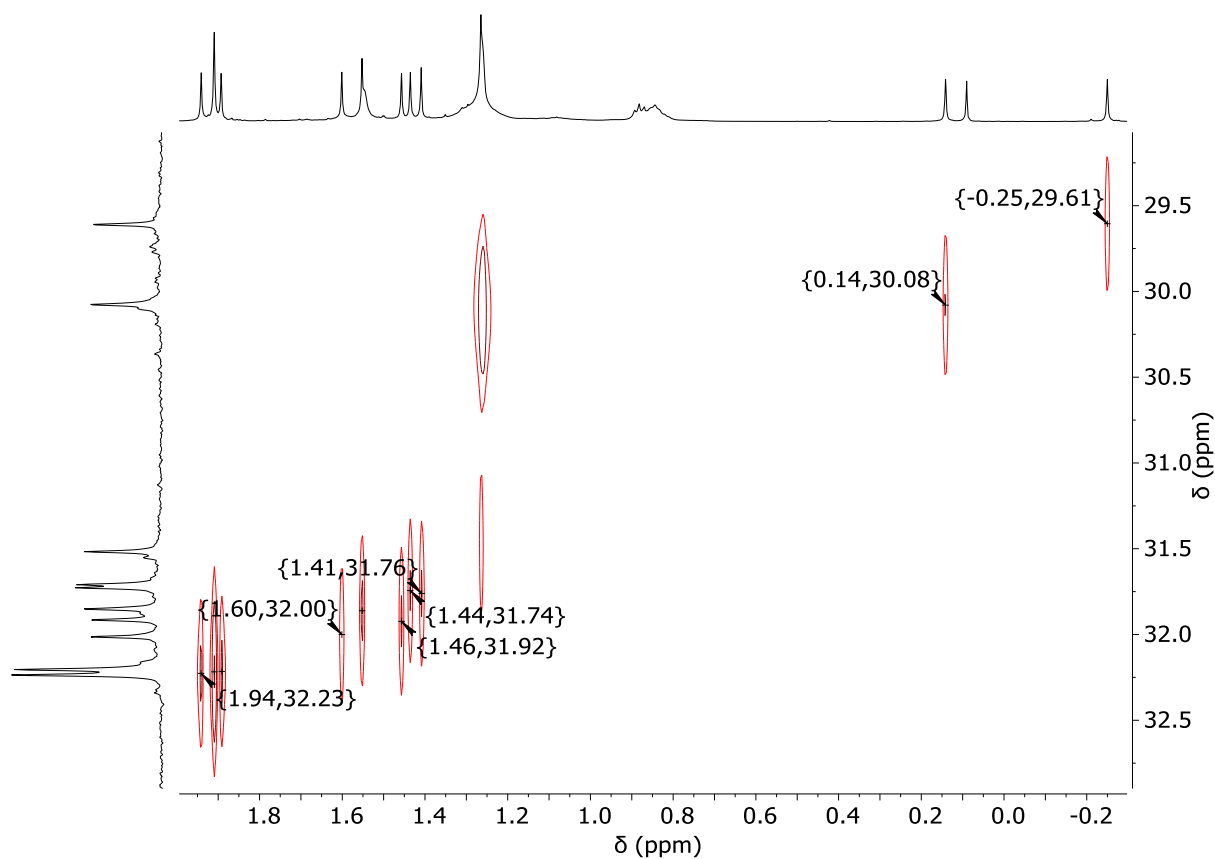

Figure S15. Partial  $^1\text{H}$ - $^{13}\text{C}$  HSQC (500 MHz, 126 MHz, MHz,  $\text{CD}_2\text{Cl}_2$ ) spectrum of compound (P,P,M)-1.

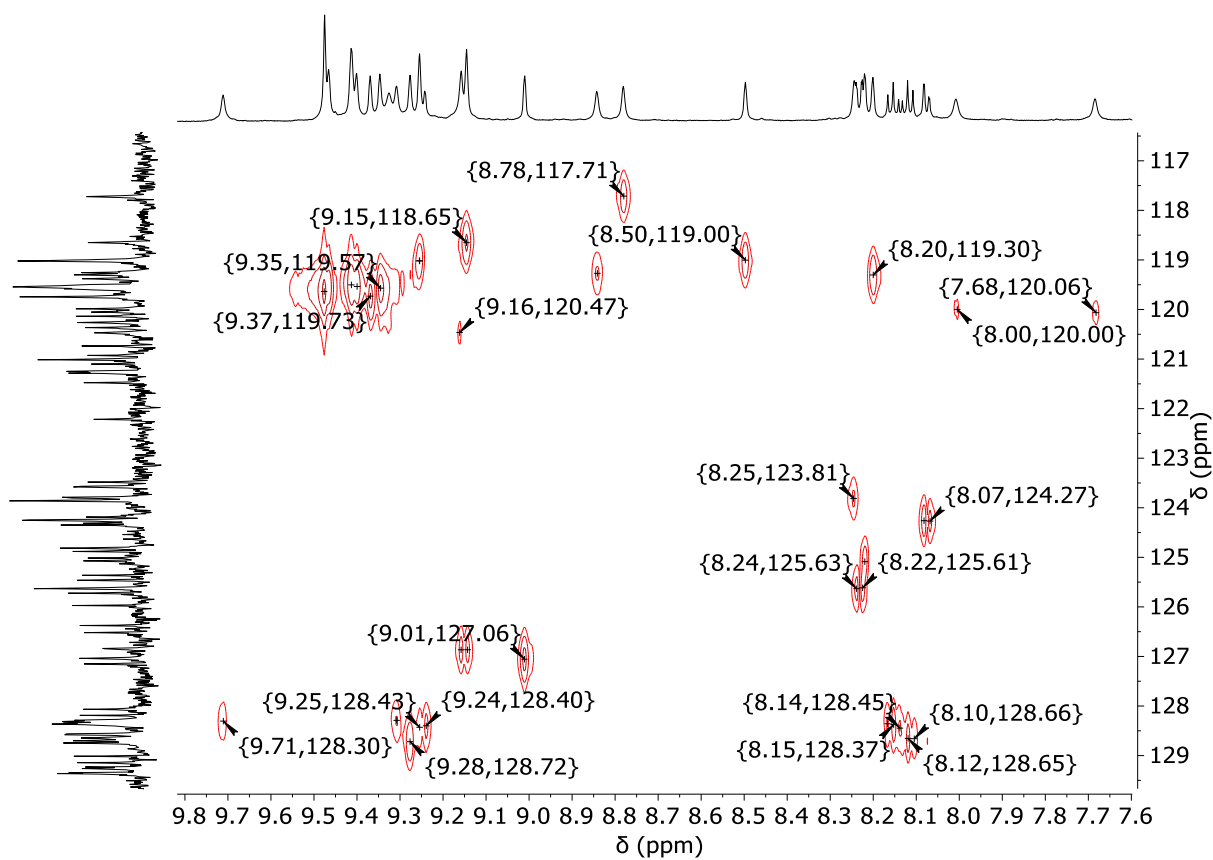

Figure S16. Partial  $^1\text{H}$ - $^{13}\text{C}$  HSQC (500 MHz, 126 MHz, MHz,  $\text{CD}_2\text{Cl}_2$ ) spectrum of compound (P,P,M)-1.

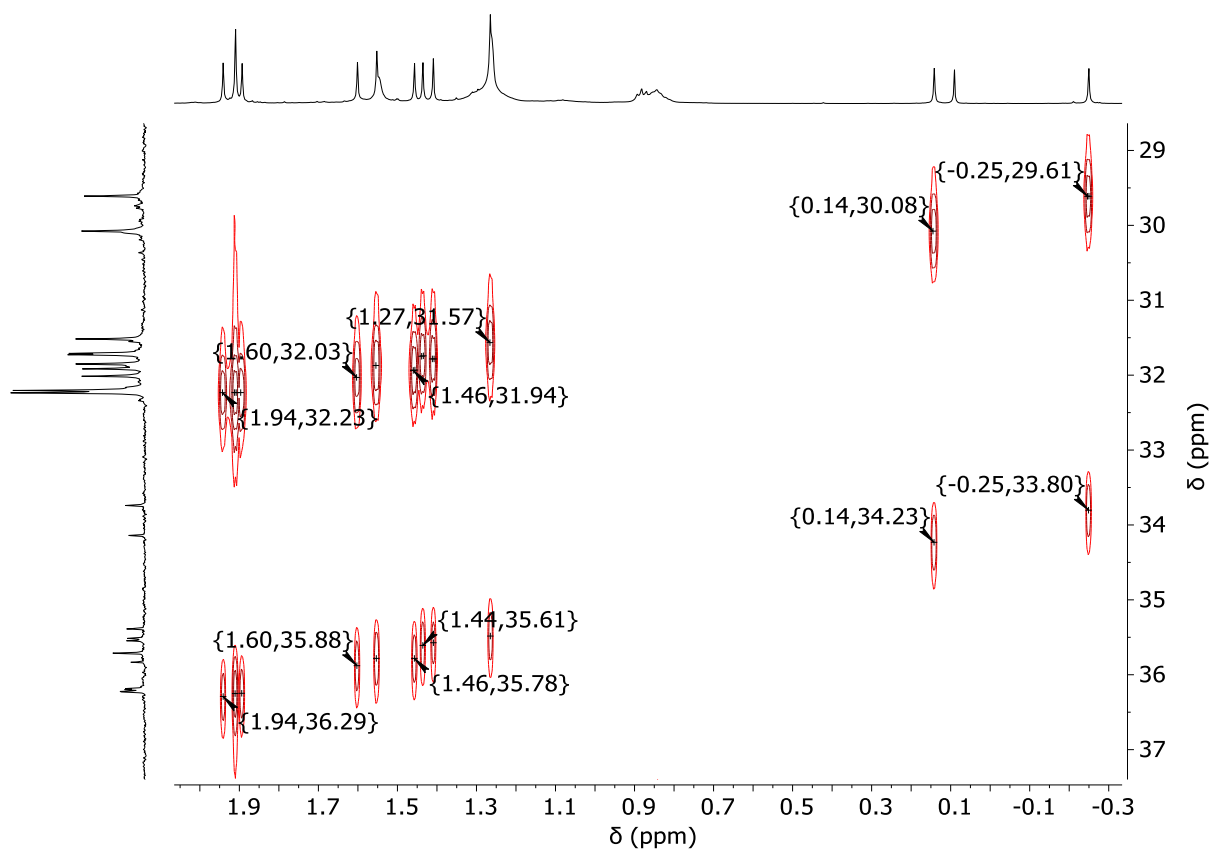

Figure S17. Partial  $^1\text{H}$ - $^{13}\text{C}$  HMBC (500 MHz, 126 MHz, MHz,  $\text{CD}_2\text{Cl}_2$ ) spectrum of compound  $(P,P,M)$ -1.

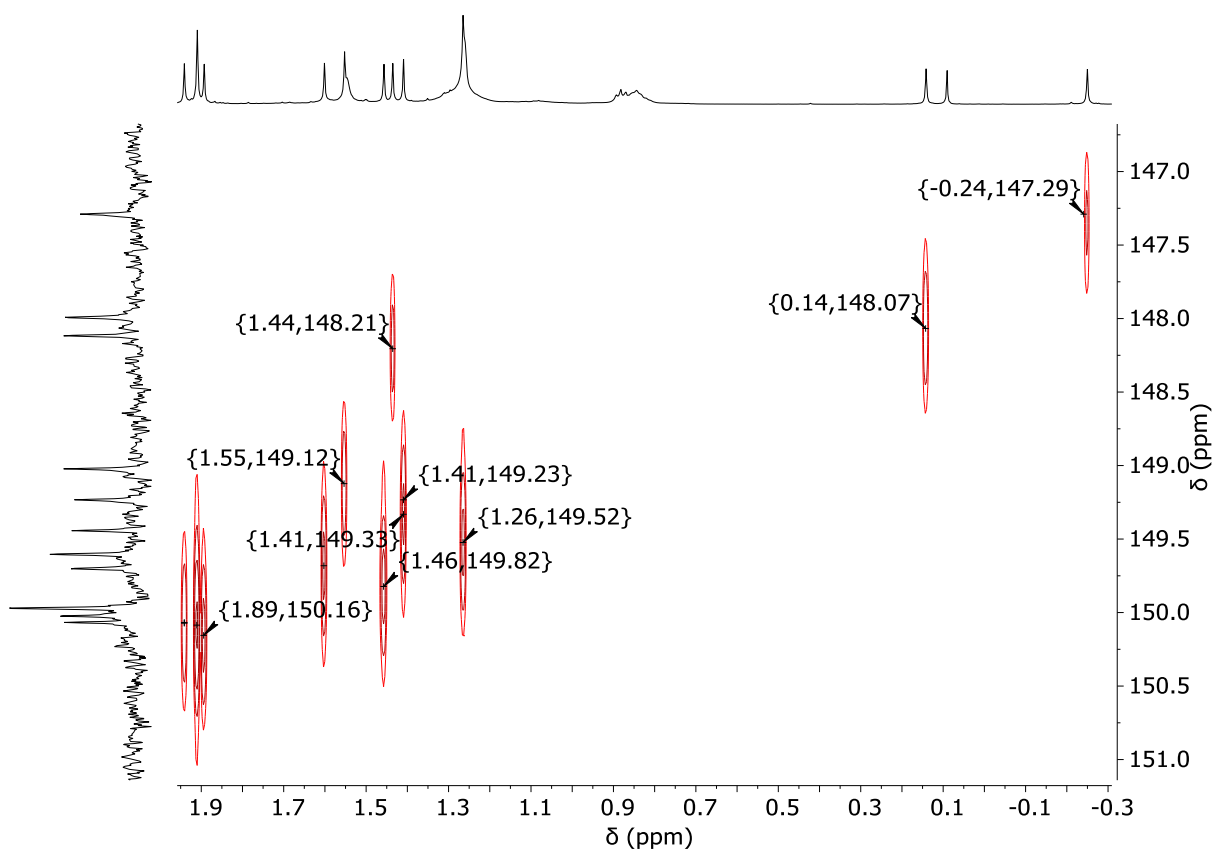

Figure S18. Partial  $^1\text{H}$ - $^{13}\text{C}$  HMBC (500 MHz, 126 MHz, MHz,  $\text{CD}_2\text{Cl}_2$ ) spectrum of compound  $(P,P,M)$ -1.



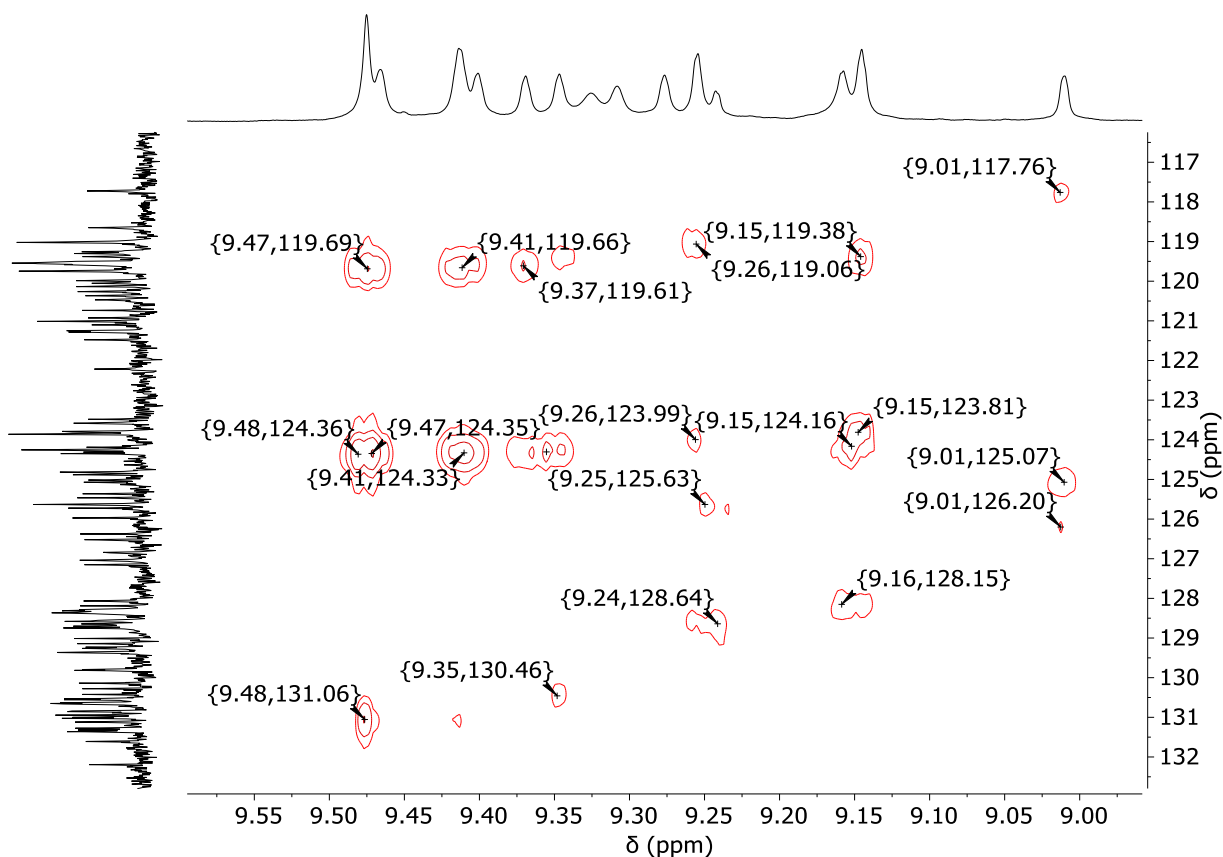

Figure S19. Partial  $^1\text{H}$ - $^{13}\text{C}$  HMBC (500 MHz, 126 MHz, MHz,  $\text{CD}_2\text{Cl}_2$ ) spectrum of compound (*P,P,M*)-1.

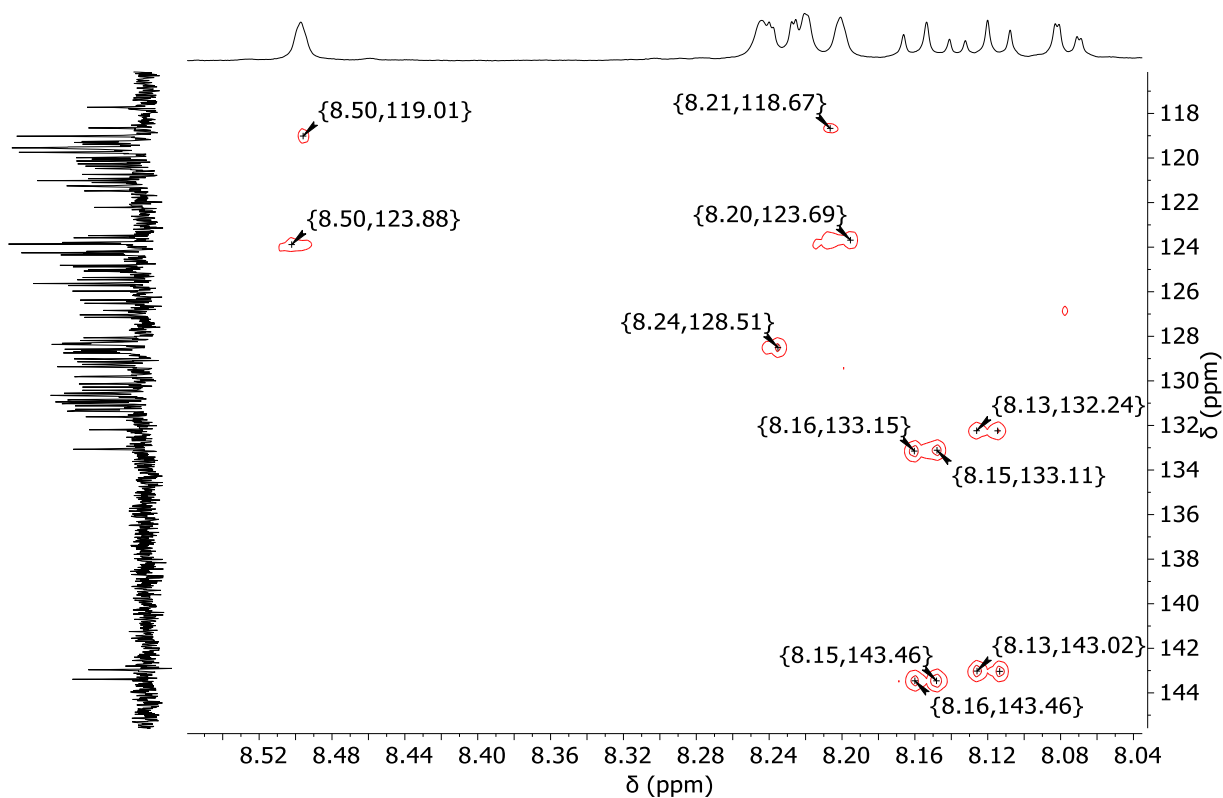

Figure S20. Partial  $^1\text{H}$ - $^{13}\text{C}$  HMBC (500 MHz, 126 MHz, MHz,  $\text{CD}_2\text{Cl}_2$ ) spectrum of compound (*P,P,M*)-1.

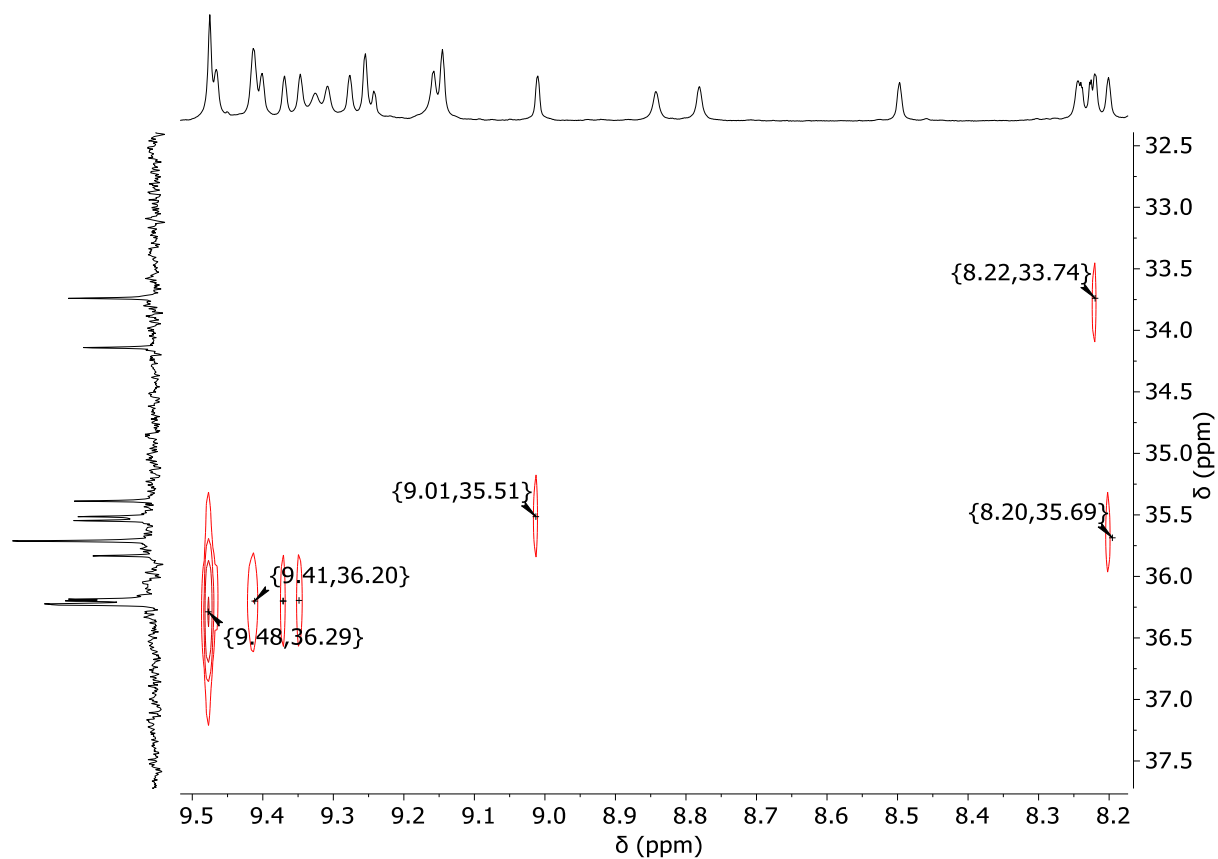

Figure S21. Partial  $^1\text{H}$ - $^{13}\text{C}$  HMBC (500 MHz, 126 MHz, MHz,  $\text{CD}_2\text{Cl}_2$ ) spectrum of compound (*P,P,M*)-1.

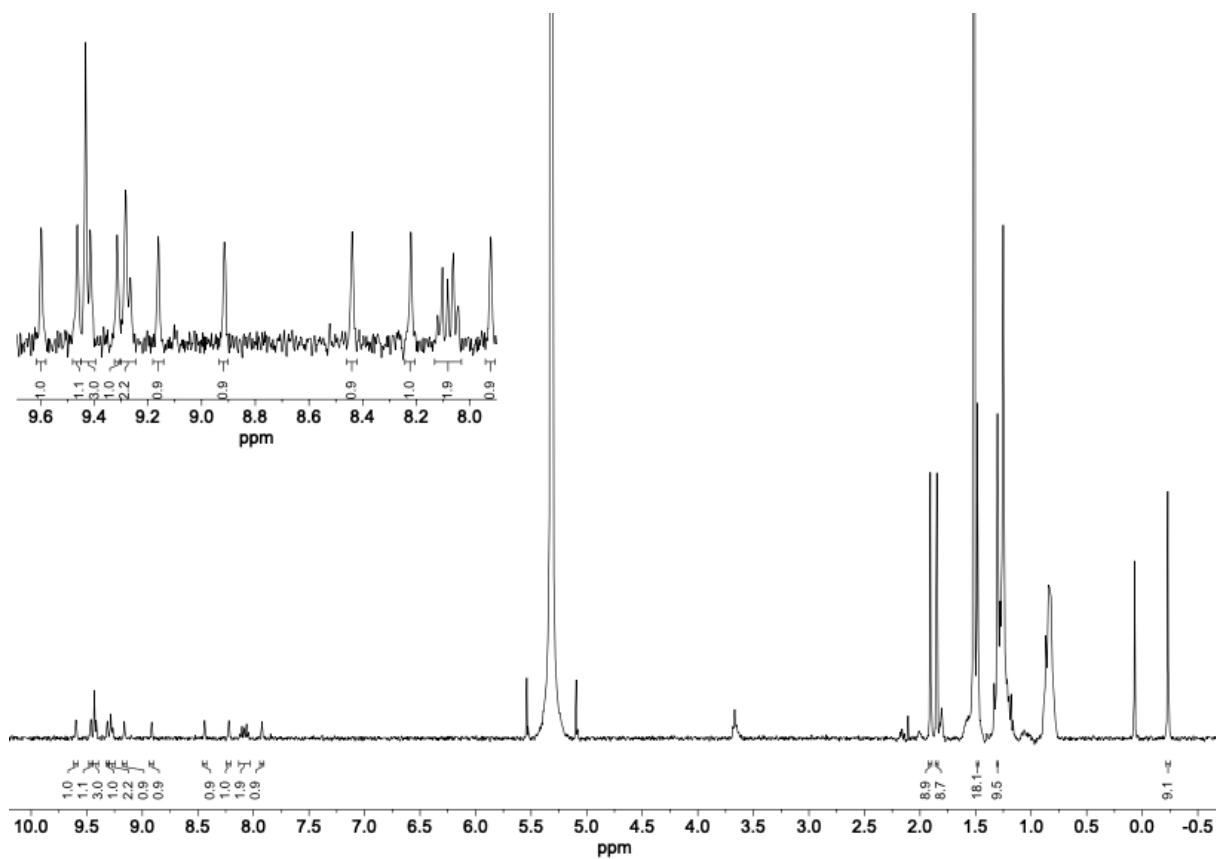

Figure S22.  $^1\text{H}$  NMR (500 MHz,  $\text{CD}_2\text{Cl}_2$ ) spectrum of compound (*M,M,M*)-1.

# ESI-TOF-HRMS spectra of compound 1

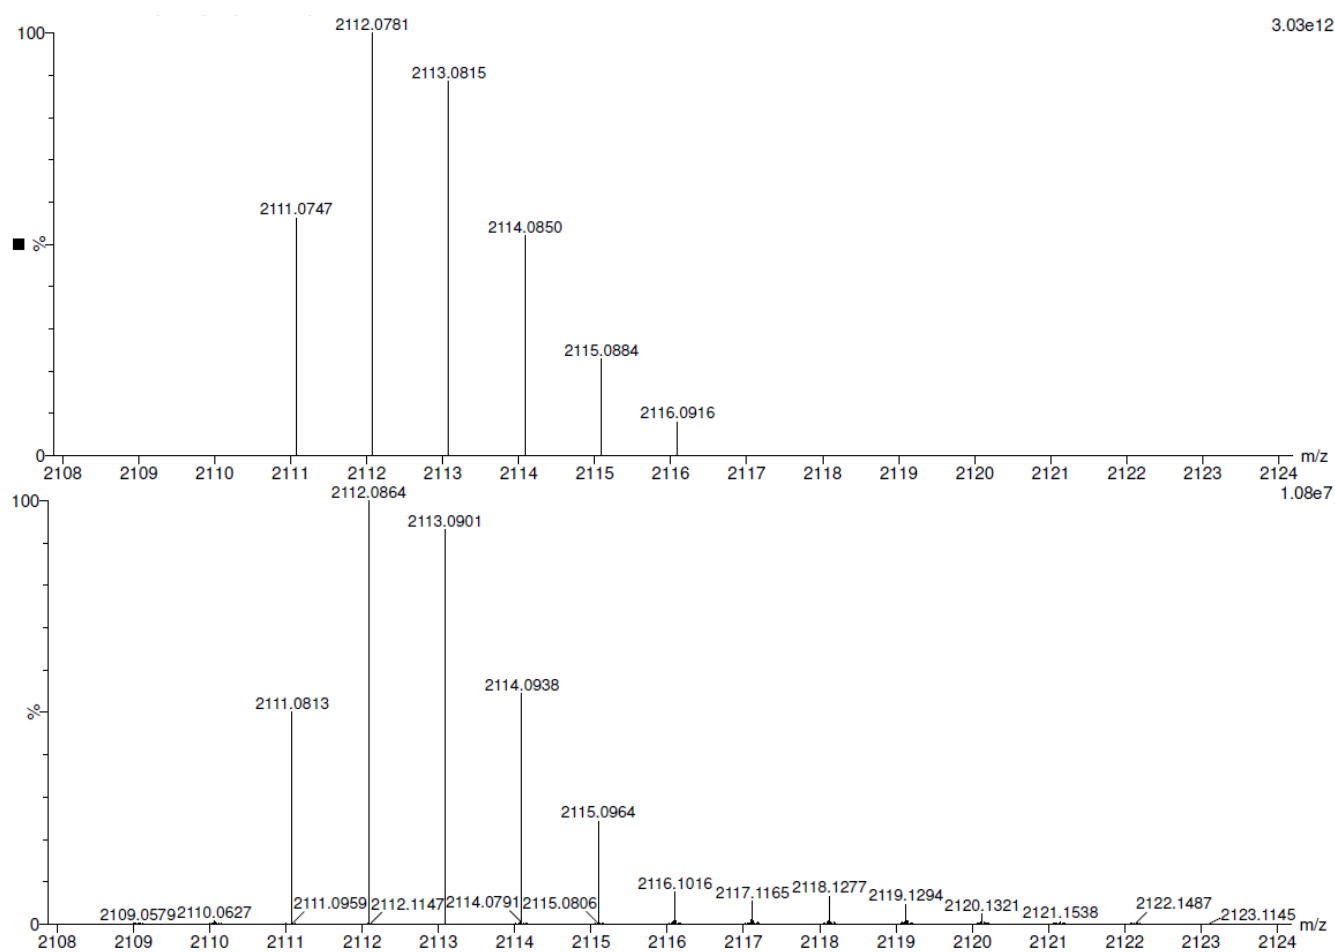

Figure S23. Theoretical (top) and experimental (bottom) ESI-TOF HRMS spectra of [M]<sup>+</sup> of compound 1.

## Single Crystal X-Ray Diffraction Structure

Single crystals of compound racemic (*P,P,M/M,M,P*)-**1** were obtained by slow evaporation of a solution of the compound in a mixture of dichloromethane and hexane. The diffraction measurements were carried out with Bruker D8 Venture diffractometer with a Mo radiation source and equipped with a PHOTON III detector. The structure was solved using SHELXT<sup>53</sup> and refined by means of the full-matrix least-squares against  $F^2$  procedure, using SHELX 2018<sup>54</sup> and the WinGX32<sup>55</sup> interface. C–H hydrogen atoms were placed in idealized positions ( $U_{\text{eg}}(\text{H}) = 1.2U_{\text{eg}}(\text{C})$  or  $U_{\text{eg}}(\text{H}) = 1.5U_{\text{eg}}(\text{C})$ ) and were allowed to ride on their parent atoms.

Unfortunately, the quality of the crystals was low and the X-ray diffraction data collected were of a too poor quality ( $R_{\text{int}} = 0.28$ ) for the adequate refinement of the structure, precluding the publication of the structure as a cif file. In this sense, after solving the structure the identity of the compound, the position of the atoms and its structure was unambiguously established. However, after applying anisotropy, a series of nearly 2D thermal ellipsoids or with an excessive prolate or oblate shape were observed in the main structure, probably due to the low quality of the data. Attempts to grow crystals of better quality or improve the diffraction data using a Cu radiation source proved unsuccessful.

Moreover, although a molecule of hexane and another one of chloroform could be located and modeled, a large amount of residual electron density was still present in the voids of the structure and could not be assigned to solvent molecules, despite it probably corresponds to disordered molecules of these solvents, especially chloroform, which has Cl atoms that have a higher electron density. Therefore, the SQUEEZE<sup>56</sup> routine included in PLATON<sup>57</sup> was applied and a density of 289 e<sup>-</sup> in an approximately 1063 Å<sup>3</sup> volume was identified. This could correspond to around 6 molecules of dichloromethane per asymmetric unit. This density was removed, and the data refined against the model.

Summary of the X-ray diffraction measurement and refinement data: Chemical formula, C<sub>17</sub>H<sub>15</sub>Cl<sub>2</sub>O; *Mr*, 2283.82; crystal size [mm<sup>3</sup>], 0.185 x 0.104 x 0.103; temperature, 100(2) K; wavelength [Å], 0.71073 (Mo K $\alpha$ ), crystal system, triclinic; space group, *P*-1; *a* [Å], 19.498(2); *b* [Å], 19.742(2); *c* [Å], 21.334(2);  $\alpha$  [°], 81.337(4);  $\beta$  [°], 74.395(4);  $\gamma$  [°], 60.717(4); *V* [Å<sup>3</sup>], 6896.7(13); *Z*, 2;  $\rho_{\text{calcd}}$  [Mg m<sup>-3</sup>], 1.100;  $\mu$  [mm<sup>-1</sup>], 0.100; *F*(000), 2432;  $\vartheta$  range [°], 2.169 to 28.471; *hkl* ranges, -26/26, -26/26, -28/28; reflections collected, 174202; independent reflections, 34092;  $R_{\text{int}}$ , 0.2838; completeness to  $\vartheta = 25.242^\circ$ , 98.8%; absorption correction, numerical; refinement method; full-matrix least-squares on  $F^2$ ; Final *R* indices [ $>2\sigma(I)$ ],  $R_1 = 0.1361$ ,  $wR_2 = 0.3010$ ; *R* indices (all data),  $R_1 = 0.2590$ ,  $wR_2 = 0.3595$ ; goodness-of-fit on  $F^2$ , 1.034.

The unit cell of the crystal structure contains the two enantiomers, (*M,M,P*)- and (*P,P,M*)-**1**, held together by the interplay of two C–H $\cdots\pi$  interactions ( $d_{\text{C}\cdots\pi_{\text{centroid}}} = 3.570$  Å) between the two terminal HBCs. The overall network is formed by alternation of homoenantiomeric layers with disordered solvent (hexane and CH<sub>2</sub>Cl<sub>2</sub> molecules) between them. Same configuration molecules within the same layer are also interacting through C–H $\cdots\pi$  interactions, but in this case between one terminal HBC *tert*-butyl and one of the benzene rings attached to the carbonyl of the tropone ( $d_{\text{C}\cdots\pi_{\text{centroid}}} = 3.583$  Å). When looking to a single (*M,M,P/P,P,M*)-**1** molecule, it is worth mentioning the angle between the terminal HBC moieties of ca. 30°, and the feasibility of intramolecular parallel displaced  $\pi$ – $\pi$  ( $d_{\text{C}\cdots\pi_{\text{centroid}}} = 3.634$  Å) and C–H $\cdots\pi$  ( $d_{\text{C}\cdots\pi_{\text{centroid}}} = 3.701$  Å) interactions.

**Table S1.** Atomic coordinates for the solid-state structure of **1**.

| Atom | X       | Y       | Z      |   |         |         |        |
|------|---------|---------|--------|---|---------|---------|--------|
|      |         |         |        | H | 25.2106 | 7.3614  | 7.7574 |
| C    | 31.4724 | 15.5577 | 4.2543 | H | 25.1092 | 8.9325  | 8.0446 |
| C    | 30.7551 | 16.5177 | 5.1315 | C | 19.8819 | 13.7113 | 1.1216 |
| C    | 23.2561 | 8.0473  | 7.7794 | H | 20.6706 | 13.4833 | 0.5856 |
| C    | 28.9752 | 17.2852 | 6.5530 | H | 19.5143 | 14.5657 | 0.8145 |
| C    | 29.5408 | 16.2229 | 5.7970 | H | 19.2051 | 13.0090 | 1.0196 |
| C    | 29.8725 | 7.1076  | 1.6495 | C | 28.7873 | 14.9625 | 5.6512 |
| C    | 19.0348 | 14.1992 | 3.4265 | C | 30.6263 | 5.7682  | 1.7358 |
| H    | 18.3339 | 13.5288 | 3.2829 | H | 30.6457 | 5.4628  | 2.6677 |
| H    | 18.7063 | 15.0790 | 3.1446 | H | 31.5448 | 5.8891  | 1.4142 |
| H    | 19.2697 | 14.2276 | 4.3770 | H | 30.1718 | 5.1001  | 1.1828 |
| C    | 21.3074 | 14.9536 | 2.7506 | C | 30.7654 | 8.1474  | 2.3213 |
| H    | 21.6093 | 14.9963 | 3.6827 | H | 30.3594 | 9.0353  | 2.2296 |
| H    | 20.8950 | 15.8068 | 2.5020 | H | 31.6470 | 8.1470  | 1.8918 |
| H    | 22.0752 | 14.7790 | 2.1671 | H | 30.8649 | 7.9304  | 3.2711 |
| C    | 24.7536 | 8.1928  | 7.5103 | C | 22.5319 | 21.1705 | 4.6076 |
| H    | 24.8978 | 8.3753  | 6.5594 | H | 21.5685 | 21.3423 | 4.6492 |

|   |         |         |         |   |         |         |         |
|---|---------|---------|---------|---|---------|---------|---------|
| H | 22.9650 | 21.8675 | 4.0704  | C | 28.4994 | 12.5439 | 5.2999  |
| H | 22.9054 | 21.1782 | 5.5134  | C | 27.0969 | 12.6884 | 5.2938  |
| C | 29.6339 | 7.4901  | 0.2136  | C | 26.5195 | 13.9373 | 5.6204  |
| H | 29.0199 | 6.8458  | -0.1979 | C | 27.3768 | 15.0483 | 5.8628  |
| H | 30.4851 | 7.4852  | -0.2712 | C | 26.7749 | 16.2043 | 6.4975  |
| H | 29.2401 | 8.3863  | 0.1751  | C | 27.5948 | 17.2200 | 7.0193  |
| C | 22.1096 | 19.7286 | 2.6048  | C | 27.0459 | 18.1953 | 7.8821  |
| H | 22.3233 | 18.8721 | 2.1791  | H | 27.6176 | 18.8490 | 8.2647  |
| H | 22.4309 | 20.4630 | 2.0426  | C | 25.6887 | 18.2193 | 8.1820  |
| H | 21.1384 | 19.8034 | 2.7174  | C | 24.8733 | 17.2726 | 7.5904  |
| C | 24.2805 | 19.6473 | 3.8024  | H | 23.9415 | 17.2972 | 7.7710  |
| H | 24.7015 | 19.6132 | 4.6866  | C | 25.3689 | 16.2768 | 6.7317  |
| H | 24.6346 | 20.4118 | 3.3014  | C | 24.4893 | 15.2385 | 6.2017  |
| H | 24.4751 | 18.8195 | 3.3155  | C | 25.0869 | 14.0219 | 5.7806  |
| C | 29.3644 | 13.6704 | 5.3924  | C | 24.2849 | 12.8709 | 5.5957  |
| C | 30.8212 | 13.3540 | 5.3348  | C | 20.2809 | 13.8257 | 2.5966  |
| C | 31.8005 | 14.2450 | 4.8377  | C | 24.8414 | 11.7433 | 4.8480  |
| C | 31.4018 | 17.7415 | 5.2609  | C | 26.2354 | 11.5783 | 4.9384  |
| H | 32.1936 | 17.9139 | 4.7678  | C | 26.8104 | 10.3095 | 4.6446  |
| C | 30.8865 | 18.7096 | 6.1113  | C | 25.0774 | 19.2724 | 9.1372  |
| H | 31.3601 | 19.5209 | 6.2575  | C | 22.7821 | 19.7990 | 3.9626  |
| C | 29.6992 | 18.4843 | 6.7317  | C | 26.1369 | 20.1865 | 9.7330  |
| H | 29.3448 | 19.1537 | 7.3039  | H | 25.7108 | 20.8261 | 10.3424 |
| C | 33.1619 | 13.9144 | 4.8398  | H | 26.5911 | 20.6736 | 9.0145  |
| H | 33.7962 | 14.5243 | 4.4819  | H | 26.7900 | 19.6499 | 10.2285 |
| C | 33.5856 | 12.7054 | 5.3595  | C | 24.3442 | 18.5458 | 10.2773 |
| H | 34.5121 | 12.5142 | 5.4373  | H | 24.9784 | 17.9828 | 10.7666 |
| C | 32.6468 | 11.7795 | 5.7601  | H | 23.6315 | 17.9861 | 9.9024  |
| H | 32.9411 | 10.9332 | 6.0776  | H | 23.9535 | 19.2059 | 10.8870 |
| C | 31.2649 | 12.0522 | 5.7149  | C | 24.0865 | 20.1442 | 8.3258  |
| C | 30.3139 | 10.9593 | 5.8874  | H | 23.6718 | 20.8039 | 8.9192  |
| C | 30.6364 | 9.6933  | 6.4030  | H | 23.3929 | 19.5724 | 7.9361  |
| H | 31.5048 | 9.5469  | 6.7581  | H | 24.5700 | 20.6063 | 7.6095  |
| C | 29.7166 | 8.6413  | 6.4092  | C | 23.0650 | 7.7867  | 9.2708  |
| C | 28.5061 | 8.8522  | 5.7621  | H | 23.6047 | 7.0146  | 9.5388  |
| H | 27.9020 | 8.1222  | 5.6835  | H | 22.1195 | 7.6042  | 9.4516  |
| C | 28.1336 | 10.0815 | 5.2239  | H | 23.3484 | 8.5761  | 9.7776  |
| C | 28.9920 | 11.1910 | 5.4006  | C | 29.9801 | 7.2892  | 7.0748  |

|   |         |         |        |   |         |         |        |
|---|---------|---------|--------|---|---------|---------|--------|
| C | 22.7478 | 6.8492  | 6.9597 | C | 25.5574 | 4.6010  | 2.5842 |
| H | 22.9222 | 7.0061  | 6.0088 | C | 26.1235 | 3.3303  | 2.3562 |
| H | 21.7841 | 6.7414  | 7.1023 | H | 27.0662 | 3.2550  | 2.2717 |
| H | 23.2132 | 6.0359  | 7.2479 | C | 25.3472 | 2.1948  | 2.2494 |
| C | 31.2844 | 7.2282  | 7.8020 | C | 23.9698 | 2.3292  | 2.3295 |
| H | 32.0200 | 7.3258  | 7.1612 | H | 23.4285 | 1.5551  | 2.2265 |
| H | 31.3633 | 6.3671  | 8.2616 | C | 23.3488 | 3.5621  | 2.5555 |
| H | 31.3266 | 7.9548  | 8.4591 | C | 21.8755 | 3.7093  | 2.5924 |
| C | 29.9169 | 6.1867  | 5.9901 | C | 21.2959 | 4.9899  | 2.7999 |
| H | 30.6481 | 6.3165  | 5.3506 | C | 19.8830 | 5.1321  | 2.7671 |
| H | 29.0589 | 6.2368  | 5.5219 | C | 19.2866 | 6.4726  | 2.9540 |
| H | 30.0075 | 5.3068  | 6.4143 | C | 17.8973 | 6.6745  | 2.8985 |
| C | 28.8608 | 7.0168  | 8.1224 | H | 17.3329 | 5.9284  | 2.7369 |
| H | 28.9860 | 6.1256  | 8.5087 | C | 17.3194 | 7.9217  | 3.0731 |
| H | 27.9860 | 7.0652  | 7.6850 | C | 18.1646 | 9.0133  | 3.2231 |
| H | 28.9092 | 7.6909  | 8.8328 | H | 17.7851 | 9.8796  | 3.3094 |
| C | 26.0405 | 9.3295  | 4.0304 | C | 19.5616 | 8.8797  | 3.2519 |
| C | 24.6341 | 9.5086  | 3.8784 | C | 20.1241 | 7.5794  | 3.1676 |
| C | 24.0449 | 10.7710 | 4.1906 | C | 21.5669 | 7.4174  | 3.2375 |
| C | 22.6561 | 10.9852 | 3.7675 | C | 22.1402 | 6.1298  | 3.0279 |
| C | 22.1604 | 12.2680 | 3.4593 | C | 23.5491 | 5.9972  | 3.0259 |
| H | 22.7424 | 13.0168 | 3.5207 | C | 24.1512 | 4.7162  | 2.7280 |
| C | 20.8360 | 12.4674 | 3.0670 | C | 25.9738 | 0.7821  | 2.0645 |
| C | 19.9791 | 11.3504 | 3.0875 | C | 27.5119 | 0.8516  | 1.9392 |
| H | 19.0514 | 11.4868 | 2.9354 | H | 27.8887 | 1.2639  | 2.7442 |
| C | 20.4342 | 10.0574 | 3.3237 | H | 27.7517 | 1.3901  | 1.1547 |
| C | 21.8280 | 9.8629  | 3.5559 | H | 27.8734 | -0.0531 | 1.8353 |
| C | 22.3882 | 8.5388  | 3.4840 | C | 25.6481 | -0.0734 | 3.2929 |
| C | 23.7956 | 8.3831  | 3.5251 | H | 26.0495 | -0.9608 | 3.1870 |
| C | 24.3720 | 7.1135  | 3.2744 | H | 24.6767 | -0.1611 | 3.3795 |
| C | 25.8037 | 6.9975  | 3.1697 | H | 26.0114 | 0.3564  | 4.0951 |
| C | 26.3977 | 5.8016  | 2.6767 | C | 25.4076 | 0.1386  | 0.7970 |
| C | 27.7313 | 5.8439  | 2.2658 | H | 25.5686 | 0.7267  | 0.0305 |
| H | 28.1339 | 5.0490  | 1.9341 | H | 24.4422 | 0.0000  | 0.9047 |
| C | 28.4928 | 7.0075  | 2.3233 | H | 25.8450 | -0.7251 | 0.6444 |
| C | 27.9414 | 8.1267  | 2.9252 | C | 18.7058 | 1.5217  | 2.1795 |
| H | 28.4666 | 8.9131  | 3.0158 | C | 17.9626 | 1.2794  | 3.4922 |
| C | 26.6130 | 8.1221  | 3.4080 | H | 17.3830 | 0.4939  | 3.3997 |

|   |         |         |        |   |         |         |        |
|---|---------|---------|--------|---|---------|---------|--------|
| H | 17.4176 | 2.0637  | 3.7091 | C | 20.9440 | 14.1365 | 6.6598 |
| H | 18.6110 | 1.1228  | 4.2107 | C | 20.2403 | 12.9321 | 6.9269 |
| C | 17.7030 | 1.7906  | 1.0559 | C | 20.9536 | 11.6739 | 6.9536 |
| H | 18.1873 | 1.9641  | 0.2207 | C | 20.2854 | 10.4701 | 7.3233 |
| H | 17.1569 | 2.5705  | 1.2846 | C | 21.0540 | 9.3189  | 7.5082 |
| H | 17.1242 | 1.0081  | 0.9398 | H | 20.6078 | 8.5090  | 7.7308 |
| C | 19.4853 | 0.2499  | 1.8324 | C | 22.4475 | 9.3004  | 7.3767 |
| H | 18.8565 | -0.4873 | 1.6804 | C | 23.0675 | 10.4825 | 6.9597 |
| H | 20.0823 | 0.0199  | 2.5757 | H | 24.0132 | 10.4974 | 6.8737 |
| H | 20.0142 | 0.4005  | 1.0227 | C | 22.3419 | 11.6450 | 6.6639 |
| C | 15.7992 | 8.1359  | 2.9540 | C | 23.0046 | 12.8539 | 6.2120 |
| C | 15.4721 | 8.4245  | 1.4790 | C | 22.3554 | 14.1074 | 6.3620 |
| H | 15.7687 | 7.6713  | 0.9252 | C | 18.8450 | 10.5032 | 7.5698 |
| H | 15.9356 | 9.2400  | 1.1940 | C | 18.1713 | 11.7573 | 7.5904 |
| H | 14.5056 | 8.5448  | 1.3753 | C | 18.8568 | 12.9739 | 7.2514 |
| C | 15.0206 | 6.8978  | 3.4059 | C | 18.1789 | 14.2105 | 7.2638 |
| H | 15.1923 | 6.1592  | 2.7848 | C | 18.8647 | 15.4097 | 6.9187 |
| H | 14.0616 | 7.1003  | 3.4150 | C | 18.1478 | 16.6635 | 6.8509 |
| H | 15.3091 | 6.6413  | 4.3063 | C | 18.7967 | 17.8231 | 6.3558 |
| C | 15.3176 | 9.3462  | 3.7798 | C | 18.0968 | 19.0399 | 6.3270 |
| H | 14.3383 | 9.3728  | 3.7808 | H | 18.5390 | 19.8200 | 6.0099 |
| H | 15.6661 | 10.1727 | 3.3832 | C | 16.7707 | 19.1339 | 6.7502 |
| H | 15.6435 | 9.2641  | 4.7004 | C | 16.1496 | 17.9697 | 7.1980 |
| C | 19.0968 | 3.9997  | 2.5657 | H | 15.2436 | 18.0221 | 7.4748 |
| H | 18.1516 | 4.0962  | 2.5543 | C | 16.7876 | 16.7416 | 7.2597 |
| C | 19.6467 | 2.7281  | 2.3809 | C | 16.1226 | 15.5284 | 7.7486 |
| C | 21.0230 | 2.6097  | 2.3952 | C | 16.7926 | 14.2769 | 7.6869 |
| H | 21.4082 | 1.7520  | 2.2641 | C | 16.1262 | 13.0965 | 8.1019 |
| C | 23.0724 | 15.3056 | 6.2017 | C | 16.8013 | 11.7984 | 7.9602 |
| C | 22.3156 | 16.5239 | 5.9347 | C | 16.1260 | 10.6006 | 8.2169 |
| C | 22.9004 | 17.5997 | 5.2362 | H | 15.2036 | 10.6338 | 8.4412 |
| H | 23.8255 | 17.5589 | 5.0232 | C | 16.7612 | 9.3542  | 8.1532 |
| C | 22.1721 | 18.7153 | 4.8459 | C | 18.1143 | 9.3364  | 7.8246 |
| C | 20.8291 | 18.7795 | 5.2465 | H | 18.5606 | 8.4996  | 7.7720 |
| H | 20.3298 | 19.5619 | 5.0418 | C | 14.8541 | 13.2142 | 8.6627 |
| C | 20.1943 | 17.7429 | 5.9306 | H | 14.4102 | 12.4287 | 8.9631 |
| C | 20.9289 | 16.5576 | 6.2058 | C | 14.2066 | 14.4449 | 8.7942 |
| C | 20.2474 | 15.3708 | 6.6434 | C | 14.8425 | 15.5669 | 8.3073 |

|   |         |         |         |    |         |         |         |
|---|---------|---------|---------|----|---------|---------|---------|
| H | 14.3917 | 16.4024 | 8.3544  | H  | 16.2814 | 7.3630  | 6.4949  |
| C | 16.0011 | 20.4686 | 6.7605  | H  | 14.8704 | 8.0900  | 6.6988  |
| C | 16.8071 | 21.6070 | 6.1606  | H  | 15.0913 | 6.6033  | 7.2484  |
| H | 16.2697 | 22.4260 | 6.1671  | C  | 14.8022 | 8.2831  | 9.3694  |
| H | 17.0513 | 21.3830 | 5.2385  | H  | 14.4069 | 7.4243  | 9.6271  |
| H | 17.6203 | 21.7451 | 6.6898  | H  | 14.1304 | 8.8262  | 8.9065  |
| C | 15.7022 | 20.8289 | 8.2231  | H  | 15.1085 | 8.7557  | 10.1712 |
| H | 16.5447 | 20.8982 | 8.7213  | O  | 31.9453 | 15.9069 | 3.1800  |
| H | 15.1434 | 20.1313 | 8.6244  | C  | 19.1138 | 4.9112  | 6.0867  |
| H | 15.2310 | 21.6869 | 8.2594  | H  | 19.7165 | 4.3791  | 5.5084  |
| C | 14.6962 | 20.3183 | 5.9778  | H  | 19.1707 | 5.8553  | 5.7932  |
| H | 14.2194 | 21.1743 | 5.9708  | Cl | 17.4704 | 4.3455  | 5.8696  |
| H | 14.1376 | 19.6352 | 6.4018  | Cl | 19.6651 | 4.7966  | 7.7373  |
| H | 14.8984 | 20.0501 | 5.0563  | C  | 28.0149 | 11.6217 | 8.9030  |
| C | 12.8305 | 14.5758 | 9.4782  | H  | 28.4605 | 12.3550 | 8.4305  |
| C | 11.8426 | 15.2813 | 8.5456  | H  | 28.2525 | 10.7691 | 8.4823  |
| H | 11.7135 | 14.7432 | 7.7365  | H  | 28.3042 | 11.6141 | 9.8404  |
| H | 12.1977 | 16.1612 | 8.2986  | C  | 26.5363 | 11.8132 | 8.8414  |
| H | 10.9827 | 15.3938 | 9.0029  | H  | 26.1025 | 11.0570 | 9.3096  |
| C | 12.9999 | 15.4277 | 10.7498 | H  | 26.2562 | 11.7750 | 7.8920  |
| H | 13.4252 | 16.2798 | 10.5159 | C  | 26.0199 | 13.1131 | 9.4433  |
| H | 13.5632 | 14.9473 | 11.3913 | H  | 26.3858 | 13.8705 | 8.9208  |
| H | 12.1221 | 15.5994 | 11.1482 | H  | 26.3673 | 13.1929 | 10.3670 |
| C | 12.2421 | 13.2222 | 9.8480  | C  | 24.4777 | 13.2432 | 9.4844  |
| H | 11.3362 | 13.3451 | 10.2016 | H  | 24.1279 | 13.1343 | 8.5643  |
| H | 12.8039 | 12.7983 | 10.5300 | H  | 24.1137 | 12.5021 | 10.0312 |
| H | 12.2076 | 12.6521 | 9.0521  | C  | 23.9726 | 14.5403 | 10.0390 |
| C | 16.0000 | 8.0362  | 8.4285  | H  | 22.9918 | 14.5764 | 9.9127  |
| C | 16.9114 | 7.0031  | 9.1126  | H  | 24.3690 | 15.2818 | 9.5159  |
| H | 17.6587 | 6.7837  | 8.5169  | C  | 24.2820 | 14.7648 | 11.5099 |
| H | 16.3981 | 6.1920  | 9.3055  | H  | 23.9317 | 14.0149 | 12.0356 |
| H | 17.2594 | 7.3778  | 9.9483  | H  | 23.8620 | 15.5975 | 11.8090 |
| C | 15.5185 | 7.4723  | 7.0994  | H  | 25.2525 | 14.8248 | 11.6346 |

---



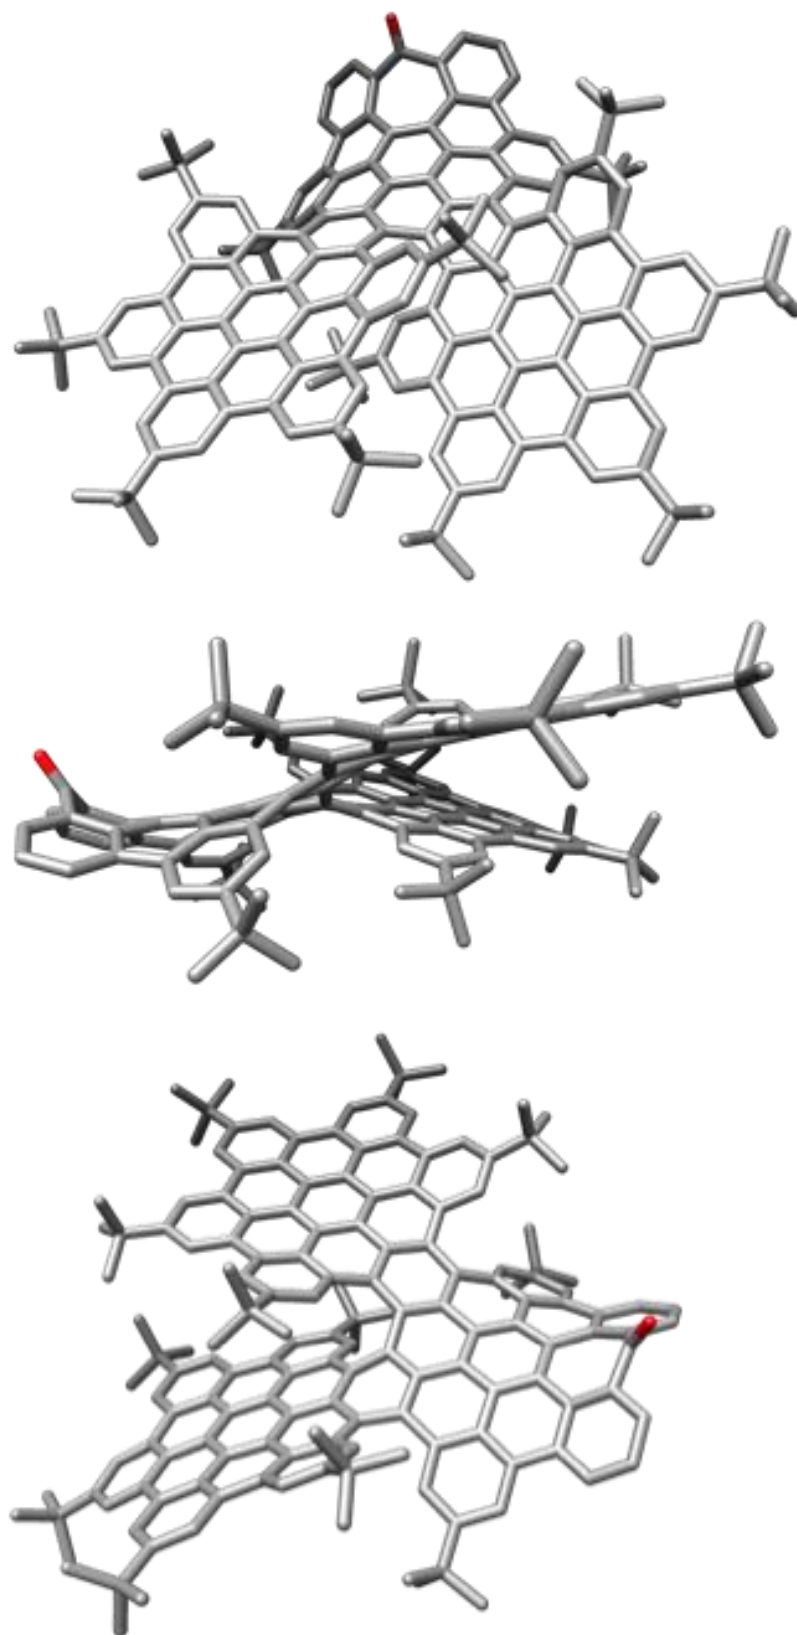

Figure S24. Front (top), side (middle) and top (bottom) views of compound (P,P,M)-1 extracted from XRD. H atoms and solvent molecules have been omitted for clarity.

## CSP-HPLC traces of compound 1

Diastereomeric resolution was neither possible by flash column chromatography, nor preparative Thin Layer Chromatography. In addition, normal phase High Performance Liquid Chromatography (HPLC) did not afford any separation. Chiral stationary phase HPLC (CSP-HPLC) was used to perform both diastereomeric and racemic resolution simultaneously.

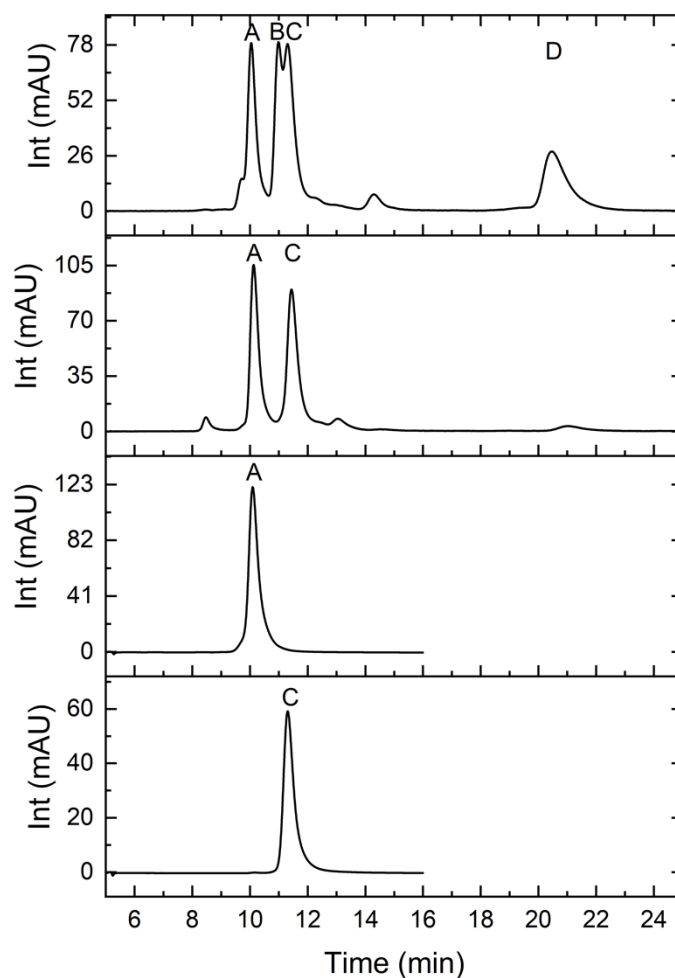

**Figure S25.** CSP-HPLC traces of compound 1. From top to bottom, First: chromatogram before reflux of 1 in toluene, containing a mixture of four main compounds: A = (*P,P,M*)-1, B = (*P,P,P*)-1, C = (*M,M,P*)-1, and D = (*M,M,M*)-1. Second: chromatogram after reflux of 1 in toluene; Third: traces of the collected fraction A; Fourth: traces of the collected fraction C. Conditions: Chiralpak® IA, *n*-Hex:DCM 8:2, flow = 3.8 mL min<sup>-1</sup>.

## Optical properties

The linear absorption spectra were recorded in a JASCO V-540 spectrophotometer. The fluorescence spectra were recorded using a Horiba Jobin Yvon Fluorlog 3-22 Spectrofluorometer with a xenon lamp of 450 W as the excitation source. The absorption and emission spectra were recorded at  $\mu\text{M}$  concentrations either in spectroscopic grade dimethyl sulfoxide (DMSO) or chloroform ( $\text{CH}_3\text{Cl}$ ). The excitation independent emission and the overlap between the absorption and excitation spectra confirmed the purity of the samples and the absence of aggregates (Figure S26).

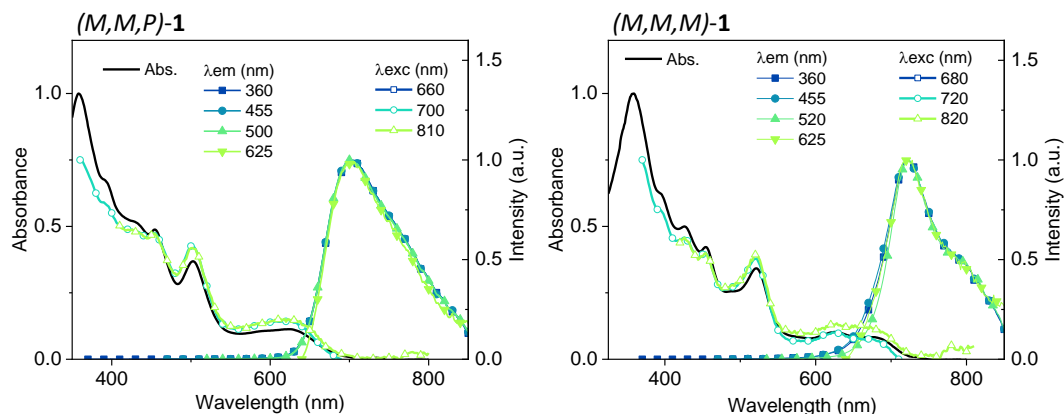

**Figure 26.** Excitation wavelength independent emission spectra ( $\lambda_{\text{exc}}$  at 660-810 nm) and emission wavenlength independent excitation spectra ( $\lambda_{\text{em}}$  at 360-625 nm) for the enantiomers pairs isolated in DMSO. The excitation spectra show a good overlap with the corresponding absorption spectra.

## Quantum Yield ( $\phi_F$ )

The fluorescence quantum yields were measured using Tetraphenylporphyrine (TPP) in toluene as standard ( $\phi_F = 0.11$ ).<sup>58</sup> For each sample, several solutions were prepared in the 0.06-1  $\mu\text{M}$  concentration range. To avoid non-linear effects the absorbances in the 5 mm quartz cuvettes were kept below 0.06 at the excitation wavelength (590 nm for  $\text{CH}_3\text{Cl}$  and 514 for DMSO). The fluorescence spectra were measured for each sample and standard at the same conditions. The plots of the absorbance versus integrated fluorescence intensity showed a good linear correlation, as illustrated in Figure S27 for the compounds in  $\text{CH}_3\text{Cl}$ . The slopes ( $m$ ) obtained from the linear fit were used to calculate  $\phi_F$  according to the following equation:

$$\phi_F = \phi_S \cdot \frac{m}{m_S} \cdot \frac{n^2}{n_S^2} \quad (1)$$

where the subscripts  $S$  denote the standard,  $m$  is the slope from the plot of integrated fluorescence intensity versus the absorbance (Figure S24), and  $\eta$  the refractive index of the solvent.

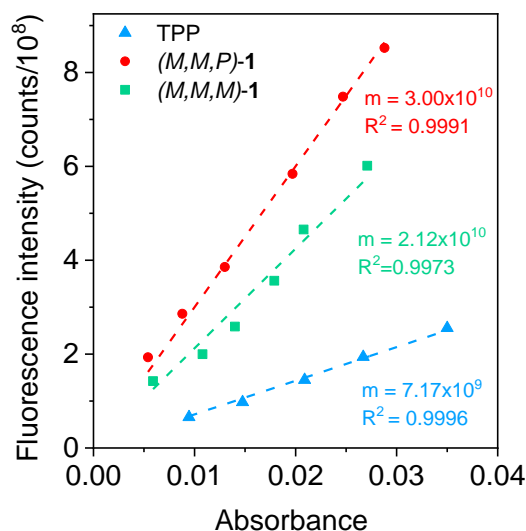

**Figure S27.** Integrated fluorescence intensity vs absorbance plots for the compounds ( $M,M,M/P,P,P$ )-1 and ( $M,M,P/P,P,M$ )-1 in  $\text{CH}_3\text{Cl}$  and the standard (TPP) fitted by a linear fit with intercept equal to zero. The legend includes the R-square and the slope.

## Emission lifetimes ( $\tau$ )

The emission lifetimes were measured by the Single-Photon Timing technique in a home-built setup using a linear excitation source operating at 330 nm with a 4 MHz repetition rate (second harmonic of a Coherent Radiation Dye laser 700 series, 560–610 nm, 130 mW, 5 ps, 4 MHz), an Hamamatsu R2809U-01 MCP-PMT as the detector and an SPC-160 photon counting board from Becker & Hickl GmbH. The emission at 680 nm (*(M,M,P)*-1, peak A) and 715 nm (*(M,M,M)*-1, peak B) was collected at the magic angle. The instrument response functions (IRF) for deconvolution (140 ps FWHM) were generated by scattering dispersions of colloidal silica in water. The solution was kept under gentle stirring during the data collection. Blank decays were acquired to ensure that dark photon counts were negligible. Decay curves were stored in 1024 channels with 39.06 ps per channel and an accumulation of 10k counts in the peak channel. The fluorescence decays were analyzed by a non-linear least-squares reconvolution method using the TRFA DP software by SSTC (Scientific Software Technologies Center, Belarusian State University, Minsk, Belarus). In both DMSO and CH<sub>3</sub>Cl, *(M,M,P)*-1 showed a slightly longer lifetime (6–7 ns) than *(M,M,M)*-1 (5 ns) as illustrated in Figure S28.

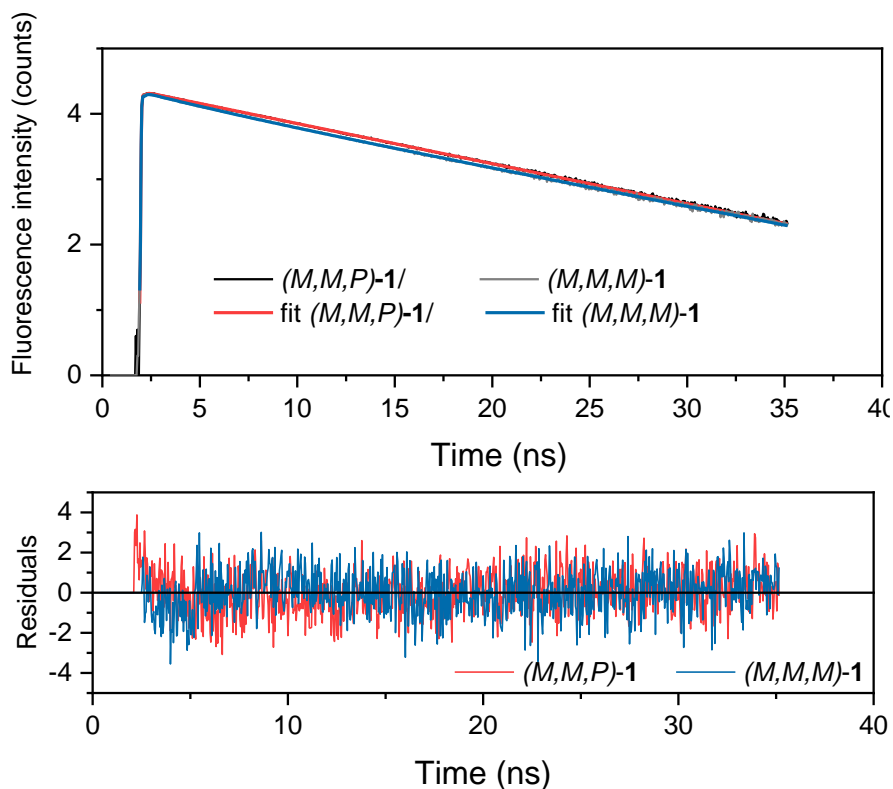

**Figure S28.** Fluorescence emission decays of compounds *(M,M,M/P,P,P)*-1 (peak D) and *(M,M,P/P,P,M)*-1 (peak A) in DMSO (black and gray, respectively). The exponential fitting of the decay is shown in red (A) and blue (D). For a better judgment of the quality of the fits, the corresponding residuals are presented.

$$\Phi_F = \frac{k_f}{k_f + k_{nr}} = k_f \tau_{av}$$

**Table S2.** Summary of photophysical properties for compound **1** diastereoisomers and undecabenz[7]helicene reported by Campaña and coworkers (*Angew. Chem. Int. Ed.*, 2018, **57**, 14782–14786), including calculated fluorescence emission rate constant ( $k_f$ ) and nonradiative decay rate constant ( $k_{nr}$ )

| Compound                        | $\Phi$ | $\tau_{av}$ (ns) | $k_f$ (ns <sup>-1</sup> ) | $k_{nr}$ (ns <sup>-1</sup> ) |
|---------------------------------|--------|------------------|---------------------------|------------------------------|
| <i>(M,M,P)</i> -1               | 0.43   | 6.1              | 0.070                     | 0.093                        |
| <i>(M,M,M)</i> -1               | 0.30   | 5.3              | 0.057                     | 0.132                        |
| Undecabenz[7]helicene (Campaña) | 0.098  | 18.0             | 0.005                     | 0.050                        |

## Two-photon absorption cross-section ( $\sigma_2$ )

The TPA spectra were measured by two-photon induced fluorescence (TPF) using Zn-2,9,16,23-tetra-tert-butyl-29H,31H-phthalocyanine as a standard to account for the collection efficiency and excitation pulse characteristics. The two-photon absorption cross-section of the reference was taken from reference.<sup>59</sup> The excitation source was a Ti:sapphire laser (Tsunami BB, Spectra-Physics, 710-990 nm, 1.7 W, 100 fs, 82 MHz). A modified setup that follows the one described by Xu and Webb was used to estimate the TPA cross-section in the 710-920 nm region.<sup>510</sup> The two-photon absorption cross-section was calculated from the following equation:

$$\sigma_2 = \left( \frac{F_2}{\phi C n} \right)_s \left( \frac{\phi C n \sigma_2}{F_2} \right)_{ref} \quad (2)$$

where  $F_2$  stands for two-photon induced fluorescence intensity,  $\phi$  is the one-photon excited fluorescence quantum yield,  $n$  refers to the refractive index in solution,  $C$  is the concentration and  $s$  and  $ref$  are relative to the sample and the TPA reference, respectively. The two-photon emission was measured within a narrow wavelength bandwidth centered at 700 nm selected by the H20Vis Jobin Yvon monochromator placed at the entrance of a PMC-100-4 photomultiplier tube (Becker and Hickl GmbH). The integrated intensity over the entire emission band was extrapolated using the emission spectra corrected by the detector sensitivity recorded by commercial spectrofluorometer. The emission intensity dependence on the excitation power was checked to be quadratic (Figure S29). Figure S30 shows the experimental one-photon absorption (OPA, black), one-photon emission (OPE, dashed black), two-photon absorption (TPA, red line with symbols) and two-photon emission (TPE, dashed red) spectra of for the racemic mixture of the high energy enantiomers ( $M,M,P/P,P,M$ )-1 measured in  $\text{CHCl}_3$  at ca.  $1 \times 10^{-6}$  M,  $\lambda_{exc} = 370$  nm for OPE and  $\lambda_{exc} = 900$  nm for TPE.

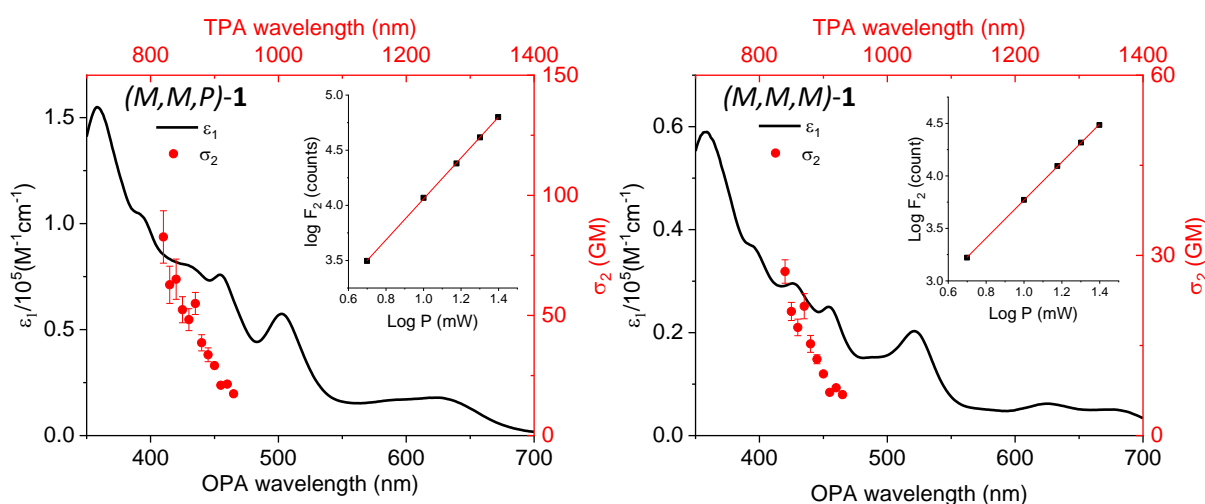

**Figure S29.** Linear molar absorptivity ( $\epsilon_1$ , black line) and two photon absorption cross-section ( $\sigma_2$ , red dots) for ( $M,M,P/P,P,M$ )-1 (peak A) and ( $M,M,M/P,P,P$ )-1 (peak D) in DMSO. The insert shows the power dependence of the two-photon emission upon excitation at 820 nm in a log-log plot. The experimental data (squares) is well represented by a linear fit with a slope  $\sim 2$  (1.9 for ( $M,M,P/P,P,M$ )-1 and 1.8 for ( $M,M,M/P,P,P$ )-1).

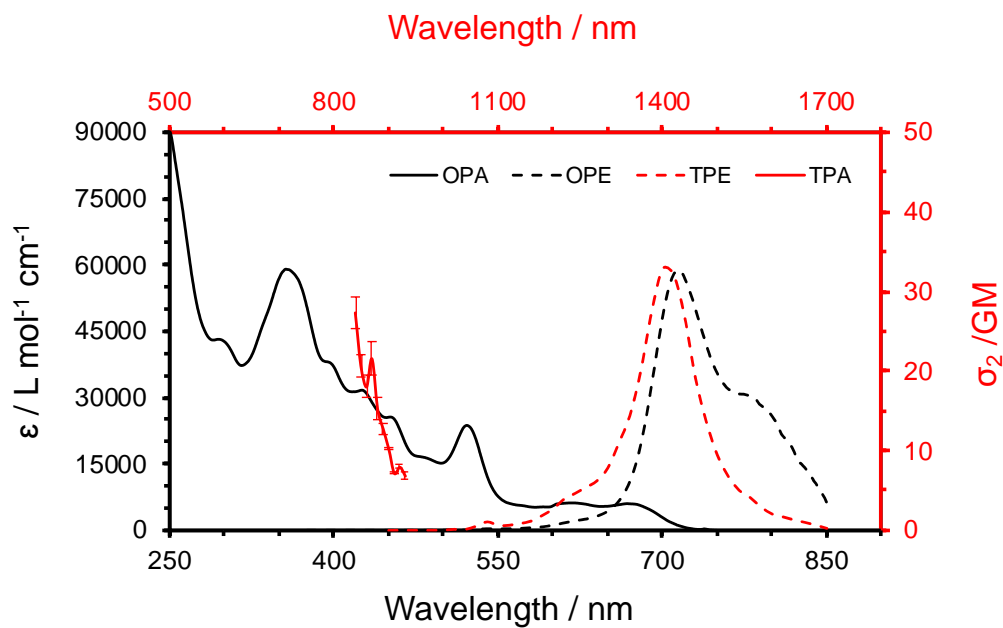

**Figure S30.** Experimental OPA (black), OPE (black, dashed), TPA (red line plus symbol) and TPE (red, dashed) spectra of  $(M,M,M/P,P,P)$ -1. Measured in  $\text{CHCl}_3$  at ca.  $1 \times 10^{-6}$  M,  $\lambda_{\text{exc}} = 370$  nm for OPE,  $\lambda_{\text{exc}} = 900$  nm for TPE.

A summary of the optical properties of the isolated enantiomer pairs is given in Table S1.

**Table S3** Summary of optical properties studied for  $(M,M,P/P,P,M)$ -1 and  $(M,M,M/P,P,P)$ -1

| compound               | solvent                | $\phi_F$ | $\tau$ (ns)       | $\epsilon_1$ ( $\text{M}^{-1}\text{cm}^{-1}$ )/ $10^5$ | $\sigma_2$ (GM) | $\phi_F \sigma_2$ |
|------------------------|------------------------|----------|-------------------|--------------------------------------------------------|-----------------|-------------------|
| $M,M,P$ -1/ $P,P,M$ -1 | $\text{CH}_3\text{Cl}$ | 0.43     | 6.1               | 1.55                                                   | $110 \pm 5$     | 47                |
|                        | DMSO                   | 0.50     | 7.1               | 1.45                                                   | $63 \pm 7$      | 32                |
| $M,M,M$ -1/ $P,P,P$ -1 | $\text{CH}_3\text{Cl}$ | 0.30     | 5.3 <sup>a)</sup> | 0.59                                                   | $30 \pm 3$      | 9                 |
|                        | DMSO                   | 0.39     | 5.4 <sup>a)</sup> | 0.59                                                   | $27 \pm 2$      | 10                |

<sup>a)</sup>Average decay estimated from a biexponential fit

## Electrochemistry

Cyclic Voltammetry (CV) and Square Wave Voltammetry (SWV) were carried out on a PGSTAT2014 potentiostat/galvanostat (Metrohm Autolab B. V.) with a three-electrode cell under Ar atmosphere at 25°C. A Pt-wire counterelectrode, an Ag wire quasireference electrode and a glassy carbon disk working electrode were used. Freshly distilled THF was used as solvent to prepare a 0.1 M solution of tetra-*n*-butylammonium hexfluorophosphate (TBAPF<sub>6</sub>) which was used as work solution. The scan rate was 0.05 V/s. Potential values are referred to the ferrocenium/ferrocene (Fc<sup>+</sup>/Fc) system, Fc was added as an internal reference after each measurement.

Electrochemical measurements of a THF solution of (*M,M,P/P,P,M*)-**1** show oxidation waves at 0.74 (quasi-reversible) and 0.45 V (reversible), three reductions centered at -1.50 (reversible), -1.70 (quasi-reversible), -1.95 V (quasi-reversible), and another three irreversible reductions with potentials at -2.28, -2.44, and -2.76 V respectively. The estimated electrochemical bandgap is in perfect agreement with the optical bandgap (1.95 eV).

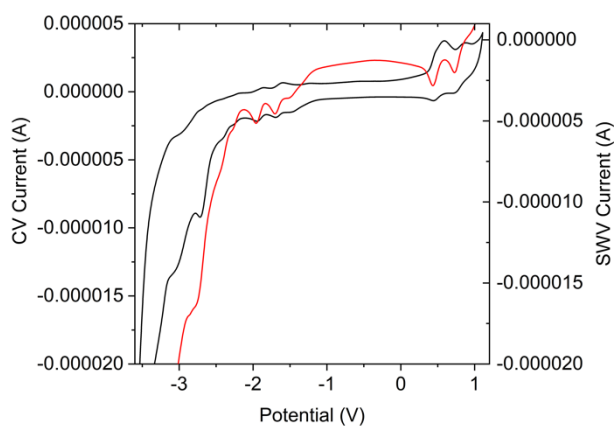

**Figure S31.** Cyclic (black) and square wave (red) voltammetry of (*M,M,P/P,P,M*)-**1** measured in THF at ca.  $1 \times 10^{-3}$  M (internal standard Fc/Fc<sup>+</sup>,  $\nu = 0.05$  Vs<sup>-1</sup>).

## Theoretical Calculations

All the calculations were performed by using the Gaussian09 suite.<sup>S11</sup> Geometry optimizations of (*M,M,M*)-**1**, (*M,M,P*)-**1** and (*P,M,P*)-**1** were carried out at DFT-CAMB3LYP/6-31G(d,p) level of theory (lateral <sup>t</sup>Bu groups that are not taking part of any helicene moiety were removed for reducing calculation costs). Harmonic frequencies were calculated in order to corroborate that found geometries were true minima. Electronic transitions were studied by TDDFT method at the same level of theory.

**Table S4.** DFT-CAMB3LYP/6-31G(d,p) energies for (*MMM*)-**1**\*, (*MMP*)-**1**\* and (*PMP*)-**1**\* (\*without lateral <sup>t</sup>Bu groups).

| Compound                   | SCF Energy (au) | Relative energy (kcal mol <sup>-1</sup> ) |
|----------------------------|-----------------|-------------------------------------------|
| ( <i>M,M,M</i> )- <b>1</b> | -5736.055601    | 3.32                                      |
| ( <i>M,M,P</i> )- <b>1</b> | -5736.060894    | 0.00                                      |
| ( <i>P,M,P</i> )- <b>1</b> | -5736.044078    | 10.55                                     |

## Optimized structures

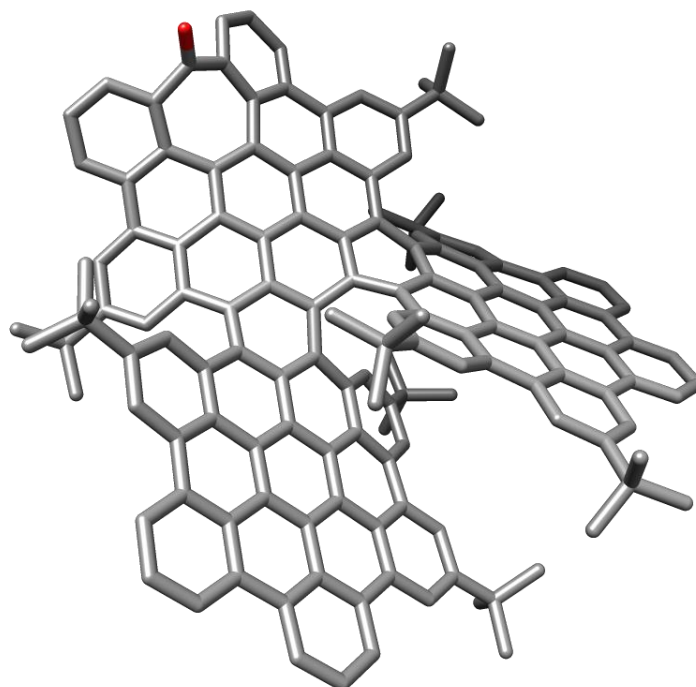

**Figure S32.** Optimized geometry of (*M,M,M*)-**1**.



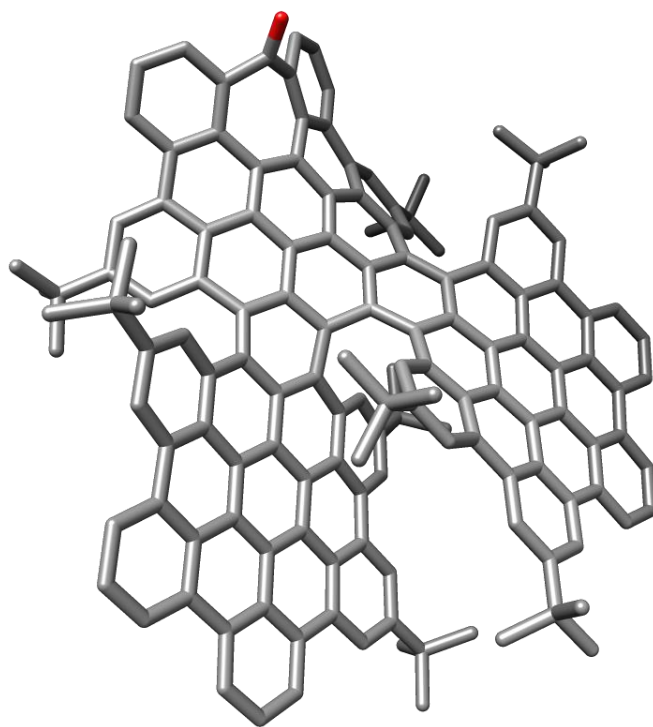

Figure S33. Optimized geometry of  $(M,M,P)$ -1.

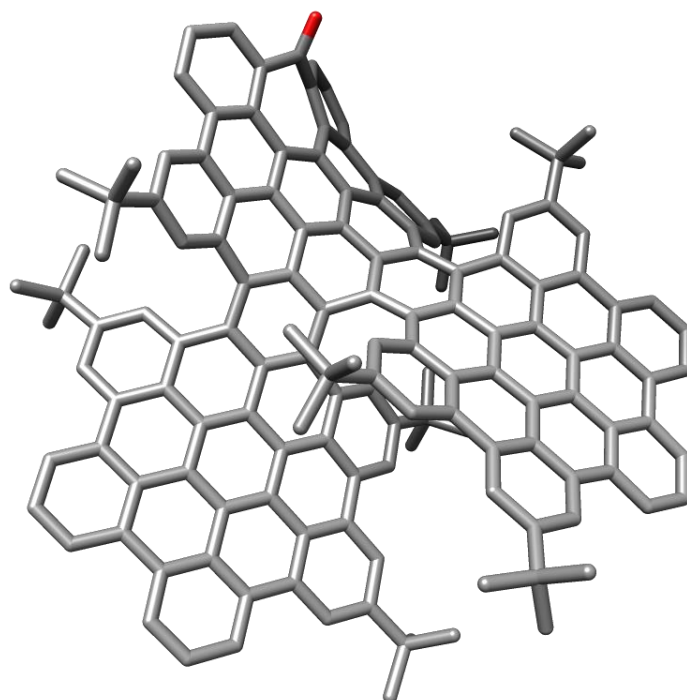

Figure S34. Optimized geometry of  $(P,M,P)$ -1.

Frontier molecular orbitals of (*M,M,M*)-1

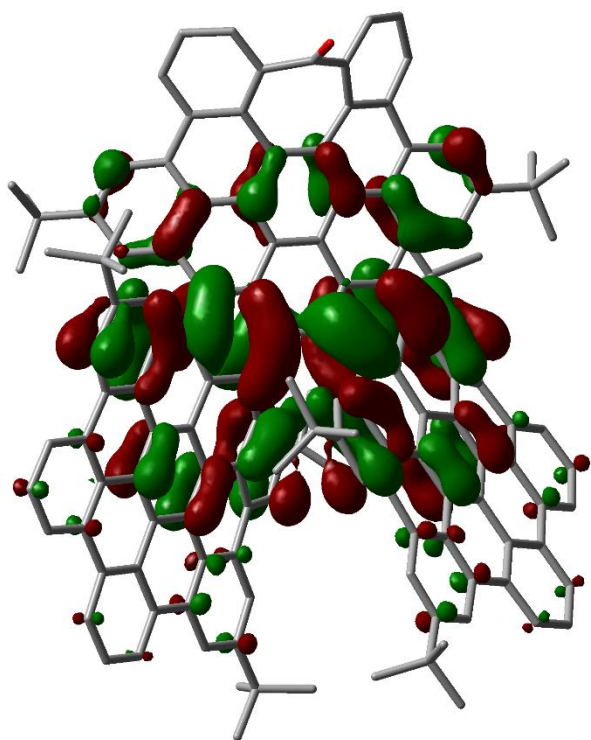

HOMO

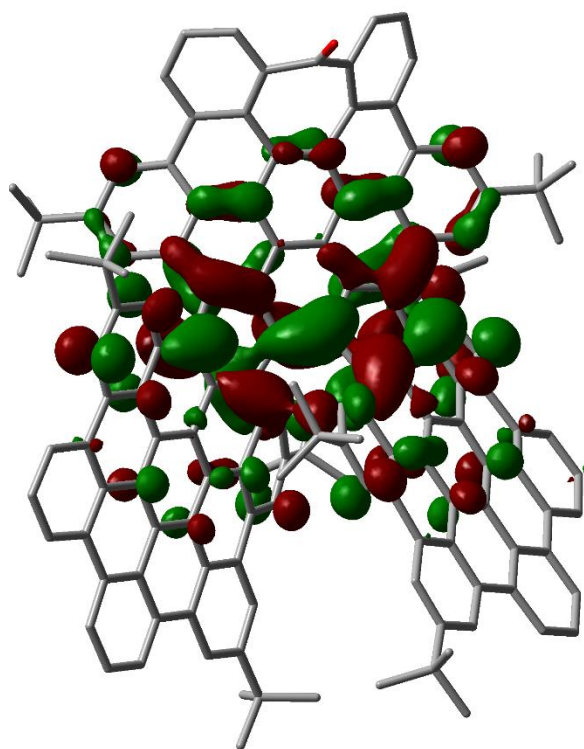

LUMO

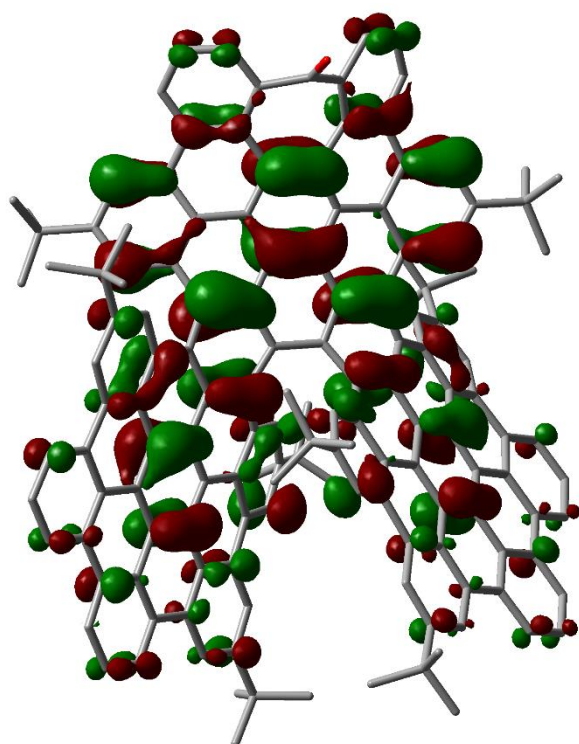

HOMO-1

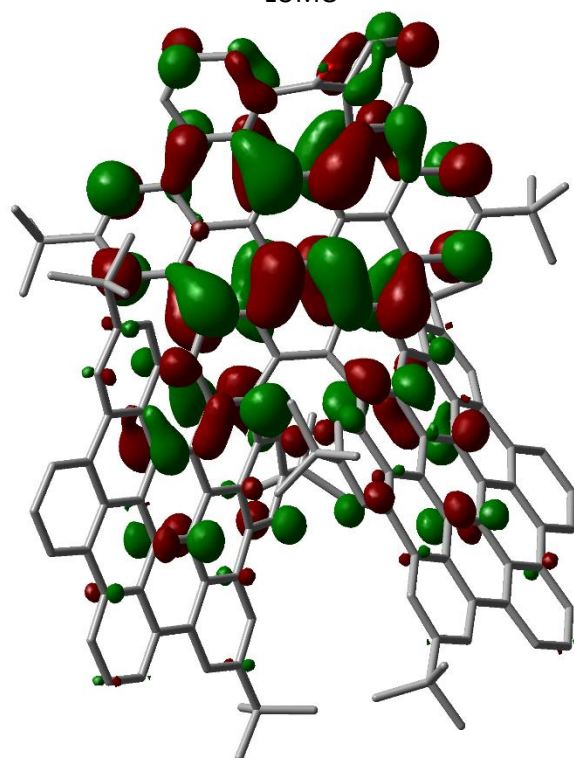

LUMO+1

Figure S35. Frontier molecular orbitals of (*M,M,M*)-1

Frontier molecular orbitals of (*M,M,P*)-1

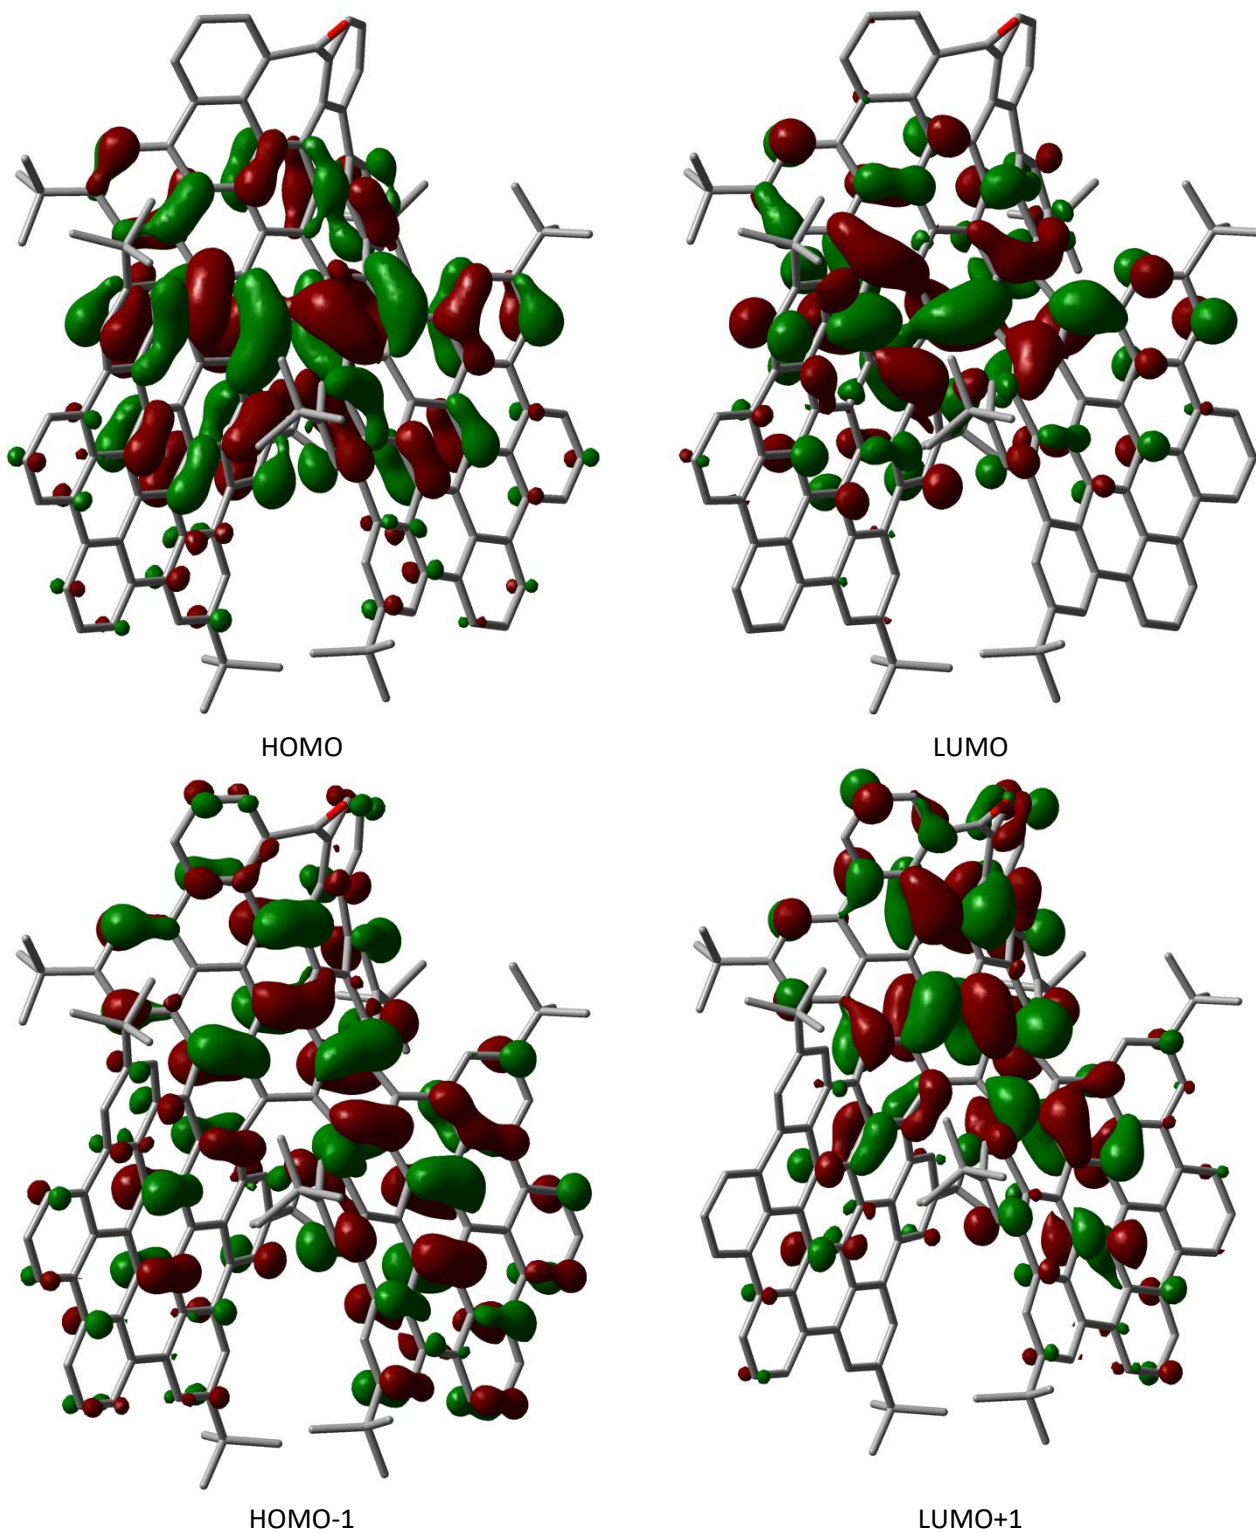

Figure S36. Frontier molecular orbitals of (*M,M,P*)-1

Frontier molecular orbitals of (P,M,P)-1

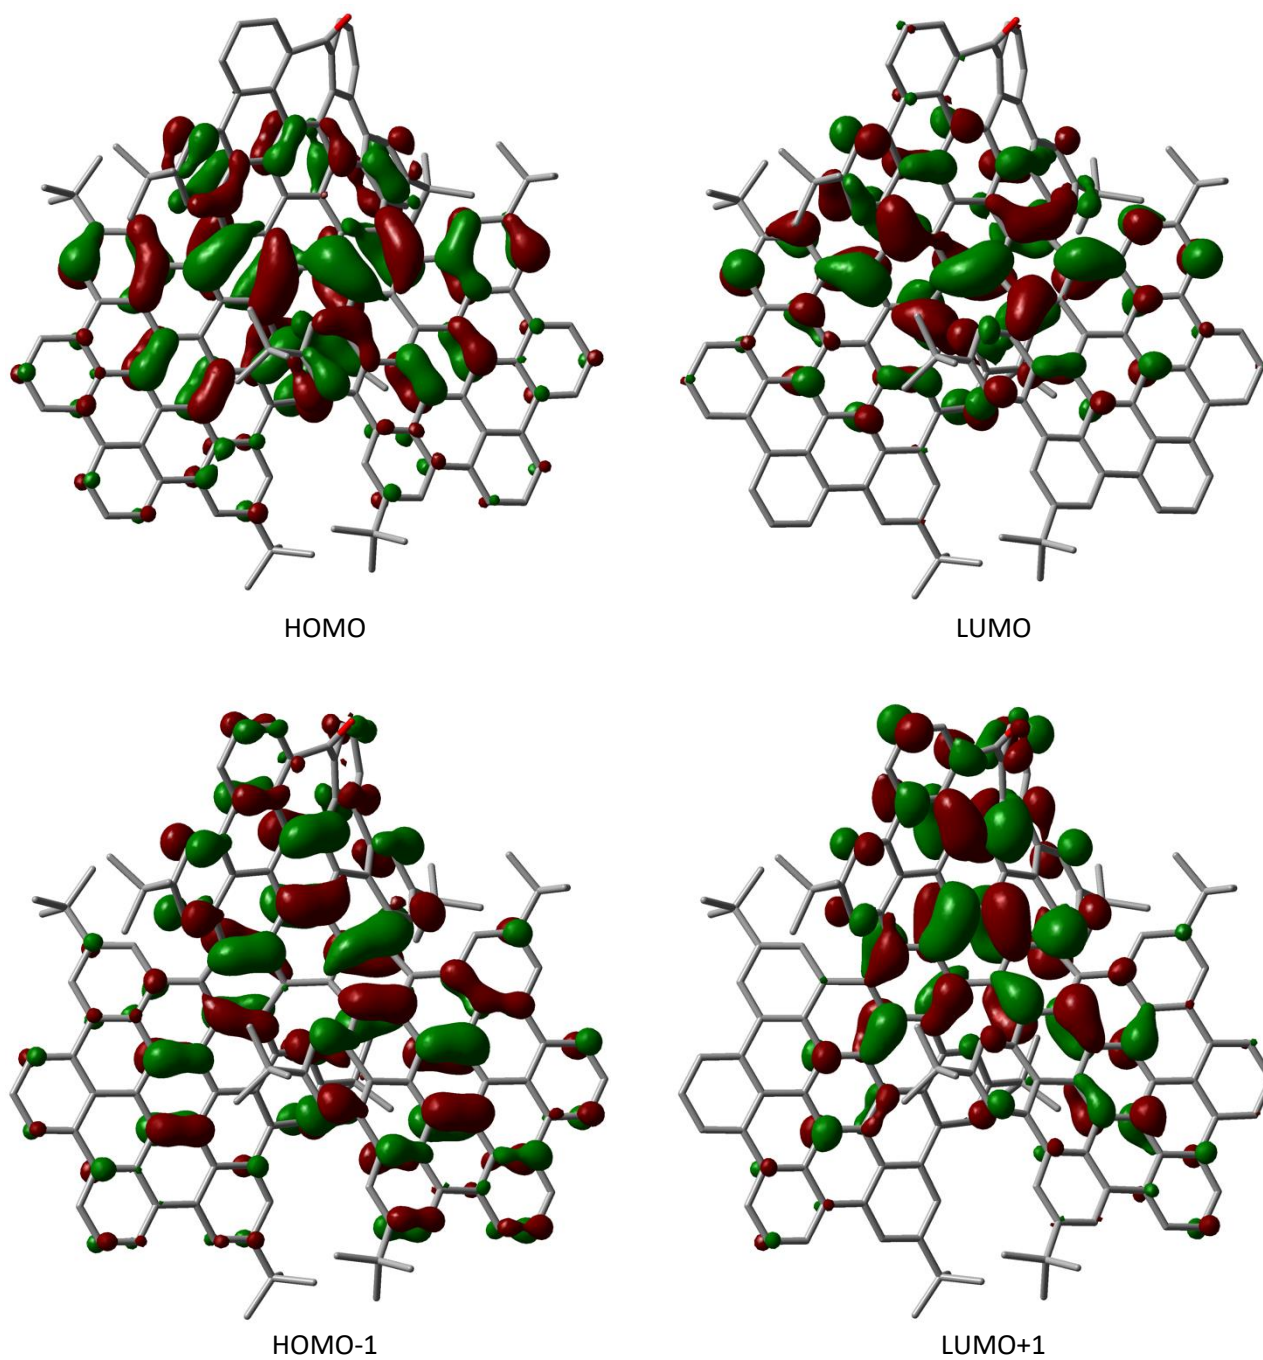

Figure S37. Frontier molecular orbitals of (P,M,P)-1

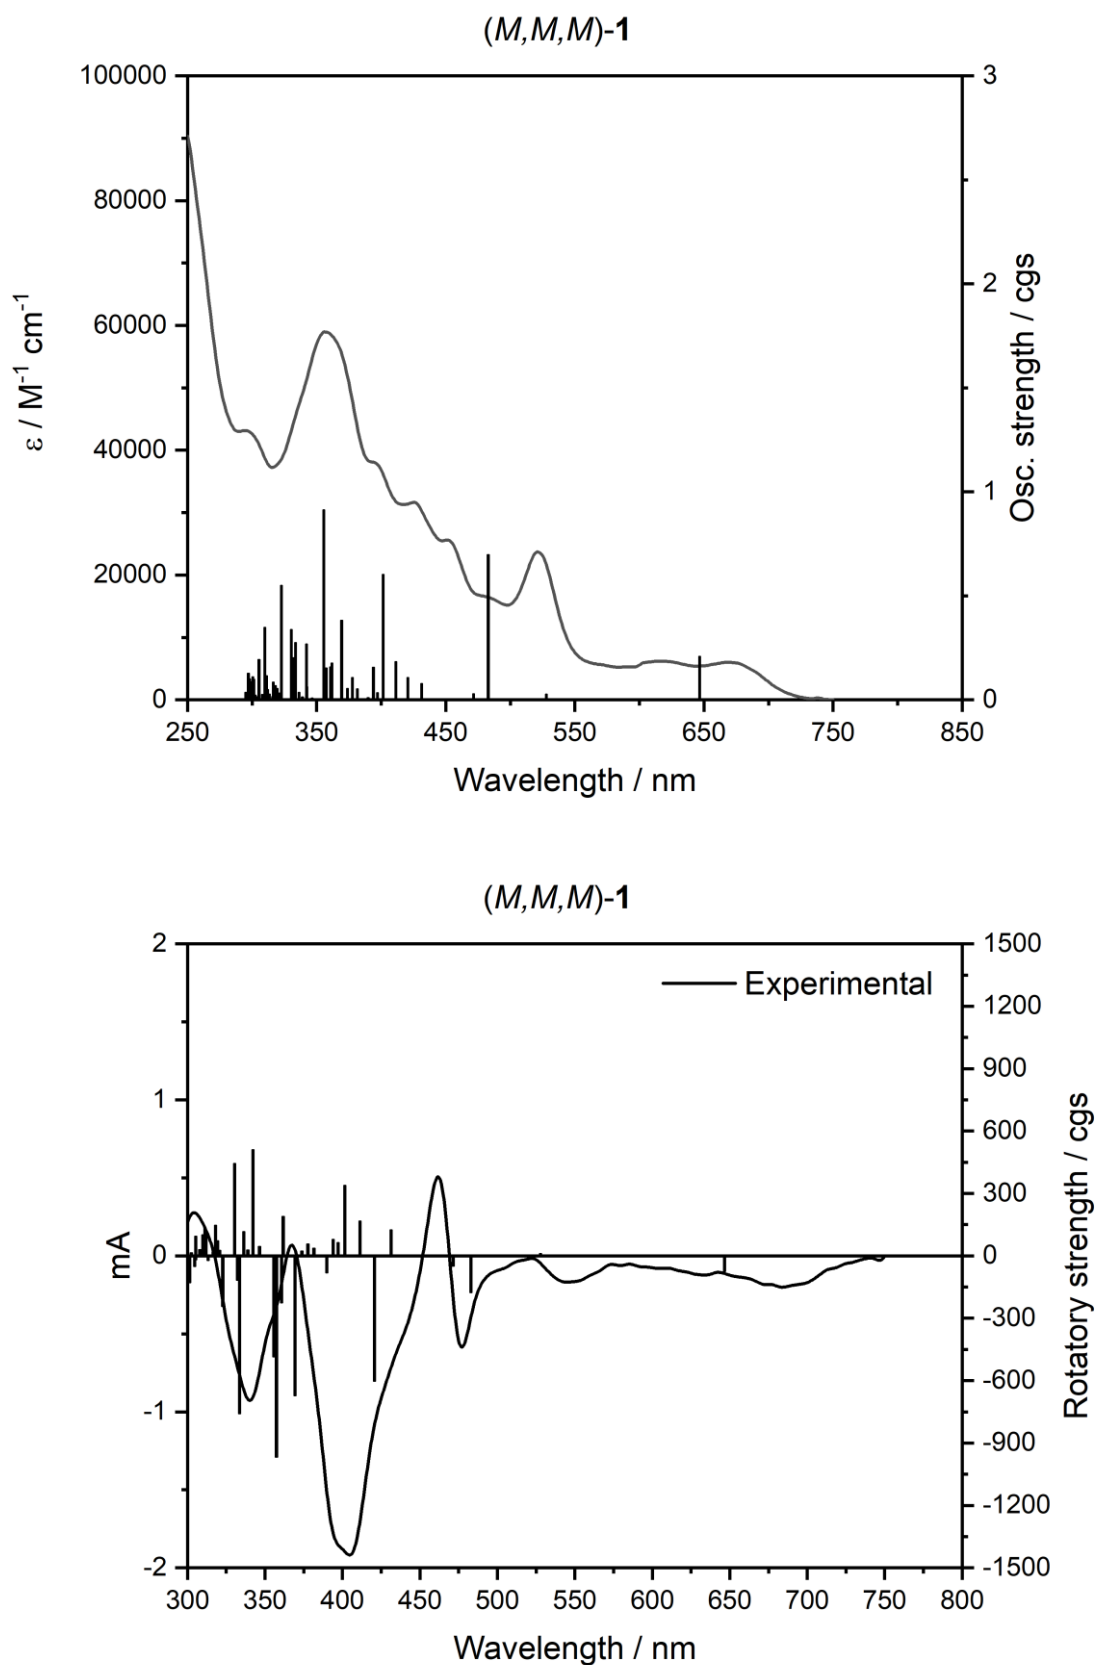

**Figure S38.** Top: Experimental (gray) UV-Vis spectrum of compound *(M,M,M)*-1 (fraction D in Figure S22) and calculated oscillatory strength for the first 50 electronic transitions (black bars). Bottom: Experimental (black) ECD spectrum of compound *(M,M,M)*-1 and calculated rotatory strength for the first 50 electronic transitions (black bars).

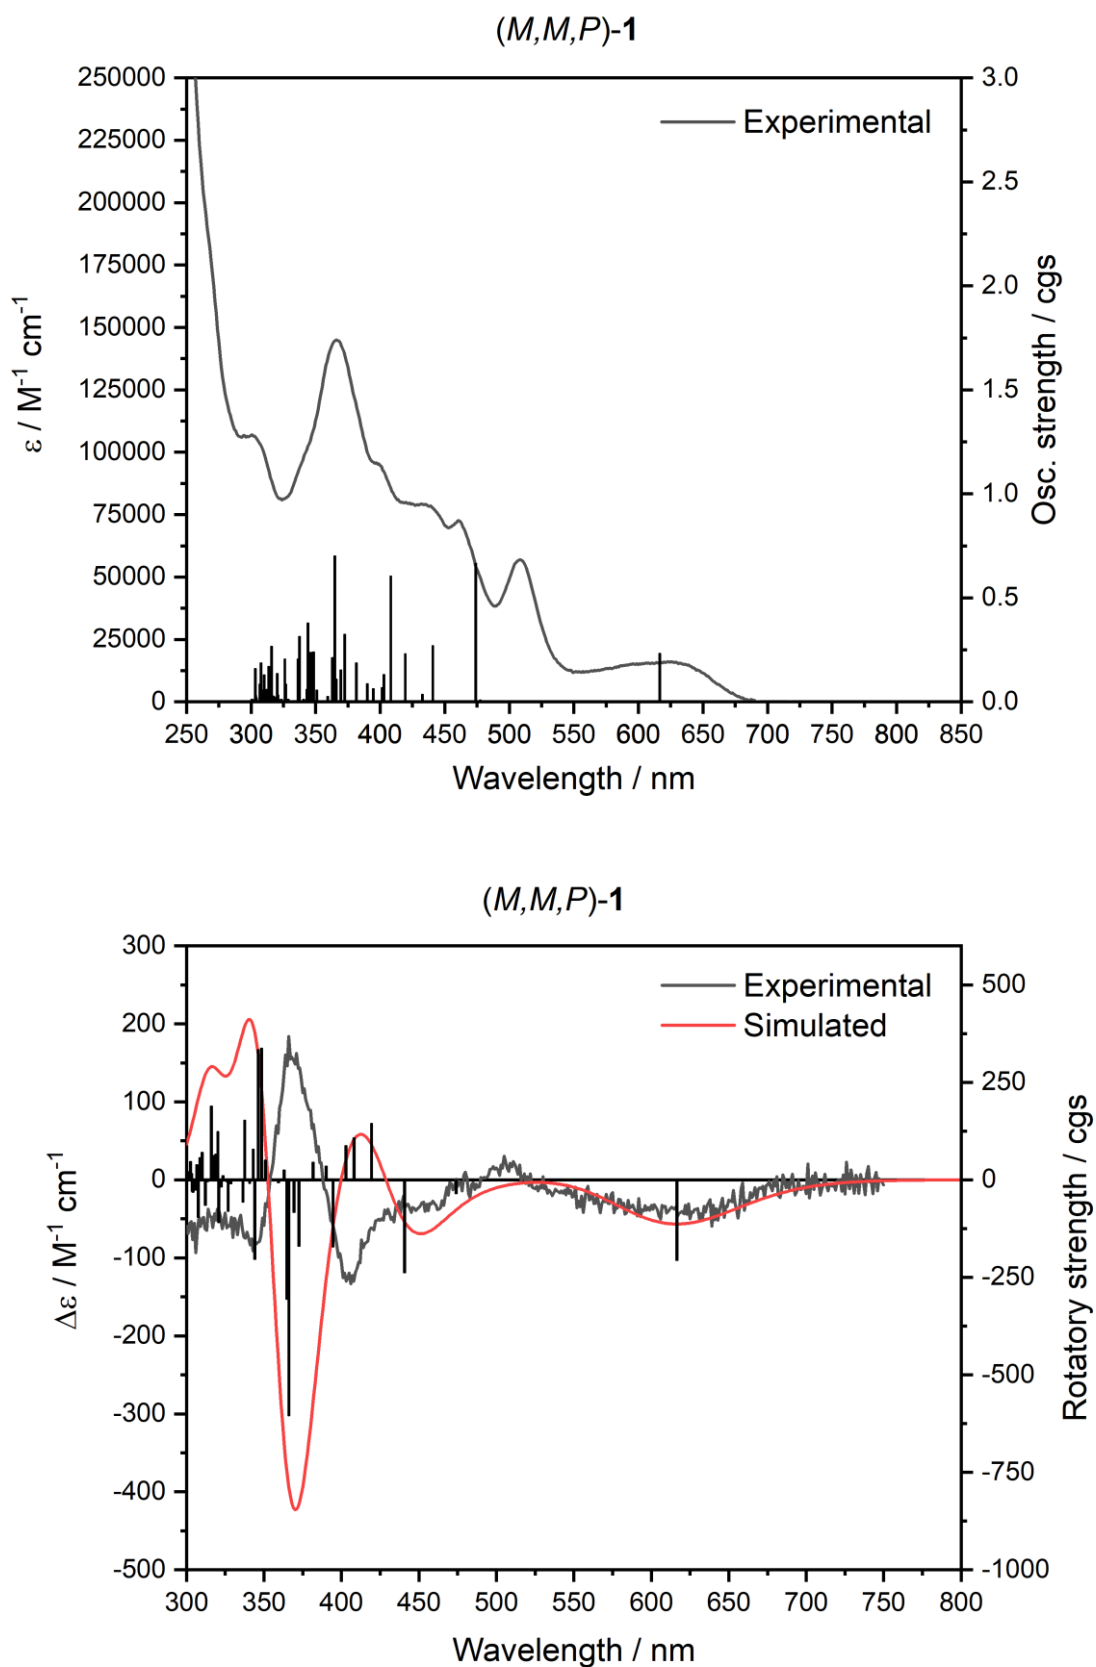

**Figure S39.** Top: Experimental (gray) and simulated (red) UV-Vis spectra of compound (M,M,P)-1 and calculated oscillatory strength for the first 50 electronic transitions (black bars). Bottom: Experimental (gray) and simulated (red) ECD spectra of compound (M,M,P)-1 and calculated rotatory strength for the first 50 electronic transitions (black bars).

Analysis of the lowest energy transition of (M,M,M)-1

| Wavelength (nm) | Orbitals Contributing to the lowest energy transition | % Contribution (gaussian coefficient) | Oscillator strength (f) |
|-----------------|-------------------------------------------------------|---------------------------------------|-------------------------|
| 646.62          | H -> L                                                | 100% (0.67239)                        | 0.2090                  |

  

| Transition electric dipole moment (esu cm) | Transition magnetic dipole moment (erg G <sup>-1</sup> ) | Angle between moments (°) | Dipole Strength (esu <sup>2</sup> cm <sup>2</sup> ) | Calculated g <sub>abs</sub> value |
|--------------------------------------------|----------------------------------------------------------|---------------------------|-----------------------------------------------------|-----------------------------------|
| $4.9299 \times 10^{-18}$                   | $2.0545 \times 10^{-20}$                                 | 93.3385                   | $2.4303 \times 10^{-35}$                            | $9.7078 \times 10^{-4}$           |

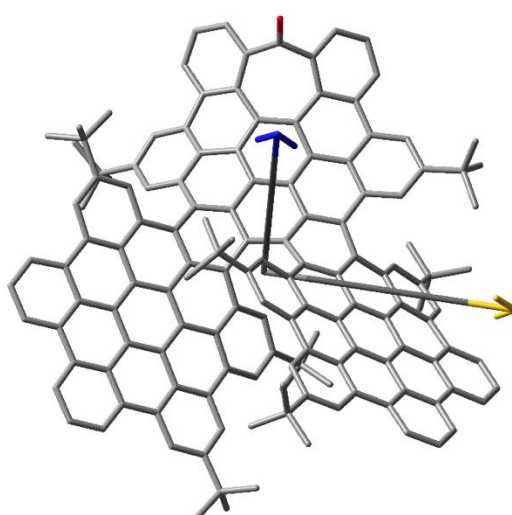

Figure S40. Calculated electric (yellow headed arrow) and magnetic (blue headed arrow) transition dipole moments for the lowest energy transition of (M,M,P)-1.

Analysis of the lowest energy transition of (M,M,P)-1

| Wavelength (nm) | Orbitals Contributing to the lowest energy transition | % Contribution (gaussian coefficient) | Oscillator strength (f) |
|-----------------|-------------------------------------------------------|---------------------------------------|-------------------------|
| 616.55          | H -> L                                                | 100% (0.66609)                        | 0.2338                  |

  

| Transition electric dipole moment (esu cm) | Transition magnetic dipole moment (erg G <sup>-1</sup> ) | Angle between moments (°) | Dipole Strength (esu <sup>2</sup> cm <sup>2</sup> ) | Calculated g <sub>abs</sub> value |
|--------------------------------------------|----------------------------------------------------------|---------------------------|-----------------------------------------------------|-----------------------------------|
| $5.0052 \times 10^{-18}$                   | $2.2230 \times 10^{-20}$                                 | 99.3042                   | $2.5052 \times 10^{-35}$                            | $2.8723 \times 10^{-3}$           |

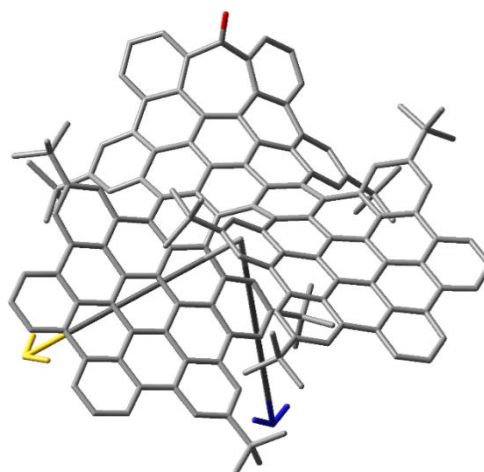

Figure S41. Calculated electric (yellow headed arrow) and magnetic (blue headed arrow) transition dipole moments for the lowest energy transition of (M,M,P)-1.

Analysis of the lowest energy transition of (P,M,P)-1

| Wavelength (nm) | Orbitals Contributing to the lowest energy transition | % Contribution to excitation (gaussian coefficient) | Oscillator strength (f) |
|-----------------|-------------------------------------------------------|-----------------------------------------------------|-------------------------|
| 562.56          | H -> L<br>H-1 -> L+1                                  | 97% (0.65422)<br>3% (0.10941)                       | 0.2566                  |

  

| Transition electric dipole moment (esu cm) | Transition magnetic dipole moment (erg G <sup>-1</sup> ) | Angle between moments (°) | Dipole Strength (esu <sup>2</sup> cm <sup>2</sup> ) | Calculated g <sub>abs</sub> value |
|--------------------------------------------|----------------------------------------------------------|---------------------------|-----------------------------------------------------|-----------------------------------|
| $5.0489 \times 10^{-18}$                   | $2.1678 \times 10^{-20}$                                 | 112.3508                  | $2.5491 \times 10^{-35}$                            | $6.5311 \times 10^{-3}$           |

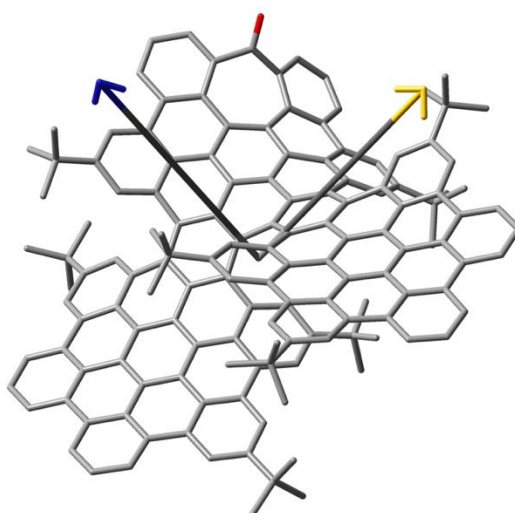

Figure S42. Calculated electric (yellow headed arrow) and magnetic (blue headed arrow) transition dipole moments for the lowest energy transition of (P,M,P)-1.



## Geometries

(M,M,M)-1

|   |             |             |             |
|---|-------------|-------------|-------------|
| C | 3.48310800  | 1.69499800  | -0.25554000 |
| C | 3.85800100  | 0.35800100  | -0.05423100 |
| C | 5.23211000  | 0.02284000  | -0.02779800 |
| C | 6.22974600  | 0.94106400  | -0.44902700 |
| C | 5.83841400  | 2.29321500  | -0.73684900 |
| C | 4.47943600  | 2.67250500  | -0.50357500 |
| C | 7.61354200  | 0.39571400  | -0.46770400 |
| C | 8.62725600  | 0.81034400  | -1.35196500 |
| C | 8.45565600  | 1.87414800  | -2.35617200 |
| C | 7.98608100  | 3.17455700  | -1.83838800 |
| C | 6.76151800  | 3.37023600  | -1.16314000 |
| C | 8.87113400  | 4.21146300  | -2.10404100 |
| C | 8.59909900  | 5.49330700  | -1.65589700 |
| C | 7.35335600  | 5.74075300  | -1.12581200 |
| C | 6.39422100  | 4.72679900  | -0.98382500 |
| C | 7.94796900  | -0.70387100 | 0.36642900  |
| C | 9.26303600  | -1.18423200 | 0.41397200  |
| C | 10.25004300 | -0.69869400 | -0.41584400 |
| C | 9.90644300  | 0.26598700  | -1.34503300 |
| O | 8.89345600  | 1.76585600  | -3.48602500 |
| C | 5.57860900  | -1.23674200 | 0.59777100  |
| C | 4.05102900  | 4.05444600  | -0.58980500 |
| C | 2.07859300  | 2.04941000  | -0.22698800 |
| C | 2.84853500  | -0.65150300 | 0.18939600  |
| C | 4.99263700  | 5.08098900  | -0.80378000 |
| C | 4.56471500  | 6.38950500  | -1.01317600 |
| C | 3.21773700  | 6.73296400  | -1.06258000 |
| C | 2.30241300  | 5.72612900  | -0.81012900 |
| C | 2.68457900  | 4.41477300  | -0.49966500 |
| C | 4.59295500  | -2.18591600 | 0.91743000  |
| C | 4.89407200  | -3.22921200 | 1.80109000  |
| C | 6.15794500  | -3.38395100 | 2.35023600  |
| C | 7.15522500  | -2.50693500 | 1.91953100  |
| C | 6.89767700  | -1.47497600 | 1.02307100  |
| C | 1.47691900  | -0.31092300 | 0.18751000  |
| C | 0.56214400  | -1.27546200 | 0.68115500  |
| C | 0.91587900  | -2.63741300 | 0.54948400  |
| C | 2.26097800  | -2.99935400 | 0.31728300  |
| C | 3.23382500  | -1.98159700 | 0.44275400  |
| C | 1.67728500  | 3.39929000  | -0.22161500 |
| C | 0.30028700  | 3.67152400  | -0.00384900 |
| C | -0.62344000 | 2.69747000  | -0.44136900 |
| C | -0.19016800 | 1.38049200  | -0.70584100 |
| C | 1.09902100  | 1.02442400  | -0.24229100 |
| C | -2.02038400 | 3.04006000  | -0.58835800 |
| C | -0.10115100 | -3.66044700 | 0.65625600  |
| C | -2.48881200 | 4.29718100  | -0.15272000 |
| C | -3.85200700 | 4.63479600  | -0.29036200 |
| C | -4.74065300 | 3.73037500  | -0.91179200 |
| C | -4.27197200 | 2.47041100  | -1.34634000 |
| C | -2.91868200 | 2.11495700  | -1.15777300 |
| C | -1.41472200 | -3.30822300 | 1.02638600  |
| C | -2.41590600 | -4.29738300 | 1.11469900  |
| C | -2.11631500 | -5.63728600 | 0.78722200  |
| C | -0.79812200 | -5.99453100 | 0.42456000  |
| C | 0.21347200  | -5.00832700 | 0.38159900  |
| C | -1.59025300 | 5.17883500  | 0.54738000  |
| C | -4.33234600 | 5.90291200  | 0.21009000  |
| C | -6.12481800 | 4.09562600  | -1.10914400 |
| C | -5.17751000 | 1.53733600  | -1.97399500 |
| C | -2.42873200 | 0.84185000  | -1.62468900 |
| C | -1.69280600 | -1.95569000 | 1.43834600  |
| C | 1.55442900  | -5.35922000 | -0.01386600 |
| C | -0.47973100 | -7.36870500 | 0.10903700  |
| C | -3.16109700 | -6.63554300 | 0.81863400  |

|   |             |              |             |
|---|-------------|--------------|-------------|
| C | -3.74597400 | -3.93310300  | 1.54159000  |
| C | -0.22716800 | 4.84501000   | 0.68717800  |
| C | 0.55841000  | 5.56026000   | 1.60075200  |
| C | 0.06356700  | 6.64294400   | 2.31183100  |
| C | -1.25202800 | 7.03590300   | 2.05720300  |
| C | -2.08317300 | 6.34030000   | 1.18461600  |
| C | -3.46147500 | 6.76176600   | 0.92505900  |
| C | -3.93383900 | 8.00072300   | 1.35659300  |
| C | -5.24359200 | 8.38181700   | 1.12397100  |
| C | -6.10743200 | 7.52968600   | 0.46101000  |
| C | -5.67686300 | 6.28588300   | -0.00658800 |
| C | -6.58811700 | 5.36939700   | -0.69641000 |
| C | -7.91692700 | 5.71758500   | -0.94277800 |
| C | -8.77985700 | 4.83737700   | -1.56928600 |
| C | -8.33693200 | 3.58534900   | -1.95368800 |
| C | -7.01764100 | 3.18728200   | -1.73004000 |
| C | -6.53998400 | 1.86356500   | -2.13687100 |
| C | -7.40768800 | 0.91659200   | -2.68914800 |
| C | -6.97633900 | -0.33658700  | -3.09814400 |
| C | -5.62087100 | -0.62642800  | -2.96190500 |
| C | -4.71078700 | 0.28085300   | -2.42862000 |
| C | -3.28382400 | -0.03818900  | -2.32613300 |
| C | -2.74127700 | -1.16869000  | -2.92817700 |
| C | -1.38181300 | -1.47268400  | -2.86762100 |
| C | -0.57199600 | -0.63789000  | -2.11250600 |
| C | -1.07361300 | 0.48889900   | -1.44964500 |
| C | -0.69578600 | -0.96300300  | 1.35443400  |
| C | -0.86968300 | 0.23484700   | 2.06010200  |
| C | -2.02638300 | 0.50312500   | 2.78010300  |
| C | -3.06547100 | -0.42423700  | 2.70078100  |
| C | -2.93159200 | -1.63783700  | 2.03629600  |
| C | -4.02044900 | -2.61505400  | 1.97612700  |
| C | -5.32133500 | -2.27260100  | 2.32823800  |
| C | -6.36762700 | -3.19249900  | 2.30536000  |
| C | -6.07102100 | -4.49241800  | 1.92183800  |
| C | -4.78463400 | -4.88580700  | 1.53864100  |
| C | -4.48903500 | -6.26806500  | 1.15337200  |
| C | -5.48563600 | -7.24498700  | 1.12549400  |
| C | -5.19391200 | -8.55380500  | 0.78801500  |
| C | -3.89617400 | -8.91945100  | 0.48203100  |
| C | -2.86235200 | -7.98174900  | 0.49755100  |
| C | -1.48512900 | -8.36297300  | 0.17708000  |
| C | -1.13801800 | -9.69333300  | -0.06615200 |
| C | 0.16060600  | -10.04479700 | -0.38439800 |
| C | 1.13743400  | -9.07106600  | -0.48783100 |
| C | 0.83993500  | -7.72716200  | -0.26001000 |
| C | 1.86237000  | -6.68653700  | -0.39355400 |
| C | 3.12407300  | -6.96821400  | -0.90884500 |
| C | 4.10097200  | -5.98832200  | -1.07654200 |
| C | 3.79652600  | -4.70212000  | -0.65982200 |
| C | 2.56278300  | -4.37195100  | -0.08531100 |
| C | 6.48712900  | -4.46373100  | 3.38744200  |
| C | 6.91083200  | -3.78383900  | 4.70153800  |
| C | 7.64116100  | -5.34434200  | 2.87626600  |
| C | 5.28675100  | -5.37204700  | 3.67706300  |
| C | 2.80543200  | 8.16140200   | -1.43563800 |
| C | 3.27869300  | 8.46585400   | -2.86858000 |
| C | 1.28620300  | 8.35971700   | -1.37777100 |
| C | 3.46021500  | 9.15898400   | -0.46414900 |
| C | 0.88689600  | 7.38109700   | 3.37470900  |
| C | 0.89823100  | 8.89150000   | 3.08139600  |
| C | 2.33986200  | 6.89346400   | 3.42305600  |
| C | 0.24721900  | 7.13955200   | 4.75404600  |
| C | -2.19013200 | 1.73454400   | 3.68012600  |
| C | -2.43167500 | 1.26709900   | 5.12748500  |
| C | -0.94548400 | 2.62737900   | 3.67500400  |
| C | -3.39410000 | 2.56883400   | 3.20993000  |
| C | -0.84227300 | -2.68206700  | -3.64167600 |
| C | 0.66910800  | -2.86169700  | -3.46078300 |
| C | -1.54286800 | -3.96107700  | -3.15004200 |

|   |             |              |             |
|---|-------------|--------------|-------------|
| C | -1.12514200 | -2.48994200  | -5.14271500 |
| C | 5.44481700  | -6.35374400  | -1.71851900 |
| C | 6.40439100  | -5.15933300  | -1.77684600 |
| C | 5.20424800  | -6.85186000  | -3.15478500 |
| C | 6.11787000  | -7.46945600  | -0.89966400 |
| H | 9.78106300  | 3.98550100   | -2.64683300 |
| H | 9.32180500  | 6.29322000   | -1.77356400 |
| H | 7.09991200  | 6.75220000   | -0.83747100 |
| H | 9.49850500  | -2.01334800  | 1.06754900  |
| H | 11.25433500 | -1.10632500  | -0.37894300 |
| H | 10.61729000 | 0.62037000   | -2.08177300 |
| H | 5.29512100  | 7.15288000   | -1.23977800 |
| H | 1.24956300  | 5.94717400   | -0.86595500 |
| H | 4.09585700  | -3.90359600  | 2.07592400  |
| H | 8.15788300  | -2.63198800  | 2.30706500  |
| H | 1.57526400  | 5.23281600   | 1.75879800  |
| H | -1.65220300 | 7.88273600   | 2.59899800  |
| H | -3.27087600 | 8.69047400   | 1.86291800  |
| H | -7.12968400 | 7.84893600   | 0.30919200  |
| H | -8.29359100 | 6.68839100   | -0.65015400 |
| H | -9.03371700 | 2.92152700   | -2.44732600 |
| H | -8.45400300 | 1.16048400   | -2.78790400 |
| H | -5.27064000 | -1.60402100  | -3.26478700 |
| H | -3.38495900 | -1.81548700  | -3.50903200 |
| H | 0.48690800  | -0.83730900  | -2.05147600 |
| H | -0.05024900 | 0.93884600   | 2.07887000  |
| H | -3.98495300 | -0.21695700  | 3.23232500  |
| H | -5.53457400 | -1.24925900  | 2.60877500  |
| H | -6.86533700 | -5.22268100  | 1.91763100  |
| H | -6.50923000 | -6.99085600  | 1.36554300  |
| H | -3.69908100 | -9.94915200  | 0.21605700  |
| H | -1.88116600 | -10.47583400 | 0.00697200  |
| H | 2.14725500  | -9.37411100  | -0.73085400 |
| H | 3.34716200  | -7.97512400  | -1.23480800 |
| H | 4.52366300  | -3.91752900  | -0.79370800 |
| H | 6.10415400  | -3.15940500  | 5.09538200  |
| H | 7.78871000  | -3.14730100  | 4.56357600  |
| H | 7.15842200  | -4.53636800  | 5.45675800  |
| H | 8.55326700  | -4.76771500  | 2.70394600  |
| H | 7.87618600  | -6.12140900  | 3.60994300  |
| H | 7.37358000  | -5.83541500  | 1.93629700  |
| H | 4.94399900  | -5.89192700  | 2.77782800  |
| H | 4.44343800  | -4.81217300  | 4.09043700  |
| H | 5.56975900  | -6.13036800  | 4.41208400  |
| H | 4.36431600  | 8.38286000   | -2.96446400 |
| H | 2.82689800  | 7.77329600   | -3.58402700 |
| H | 2.99463300  | 9.48354200   | -3.15447800 |
| H | 0.88340400  | 8.14818100   | -0.38330200 |
| H | 0.76570400  | 7.72248800   | -2.09797500 |
| H | 1.04237200  | 9.39693400   | -1.62362700 |
| H | 3.15189000  | 8.96466700   | 0.56699400  |
| H | 4.55143000  | 9.11041300   | -0.49942100 |
| H | 3.16751500  | 10.18222100  | -0.71877700 |
| H | -0.10611600 | 9.32155400   | 3.09262300  |
| H | 1.33893400  | 9.10088900   | 2.10278600  |
| H | 1.48850400  | 9.41707500   | 3.83813300  |
| H | 2.40680400  | 5.83986000   | 3.70752300  |
| H | 2.84413300  | 7.01829700   | 2.46038400  |
| H | 2.89541300  | 7.46901100   | 4.16852300  |
| H | 0.23164900  | 6.07270100   | 4.99451200  |
| H | -0.78228700 | 7.50530600   | 4.79043000  |
| H | 0.81520500  | 7.65621900   | 5.53422400  |
| H | -1.59052800 | 0.67028200   | 5.49149700  |
| H | -2.54645200 | 2.13207300   | 5.78838700  |
| H | -3.33535500 | 0.65904000   | 5.21619100  |
| H | -0.72136200 | 3.01252700   | 2.67869600  |
| H | -0.06486600 | 2.09423700   | 4.04537100  |
| H | -1.11037800 | 3.48862900   | 4.32872700  |
| H | -3.25901500 | 2.91062200   | 2.18149400  |
| H | -4.32589600 | 1.99896500   | 3.25379700  |

|   |              |              |             |
|---|--------------|--------------|-------------|
| H | -3.51503800  | 3.44984700   | 3.84780300  |
| H | 1.22776700   | -1.99687100  | -3.83024100 |
| H | 1.00347000   | -3.73571700  | -4.02625300 |
| H | 0.93849300   | -3.02464400  | -2.41438600 |
| H | -2.62470800  | -3.91710500  | -3.29962400 |
| H | -1.16824600  | -4.83118800  | -3.69800900 |
| H | -1.35874600  | -4.12554900  | -2.08551200 |
| H | -2.19468600  | -2.39921100  | -5.34867700 |
| H | -0.74848000  | -3.34624400  | -5.71083500 |
| H | -0.63458000  | -1.58863400  | -5.52104500 |
| H | 6.62065800   | -4.76026500  | -0.78162900 |
| H | 6.00691300   | -4.34664100  | -2.39093700 |
| H | 7.35251100   | -5.47225300  | -2.22277100 |
| H | 4.55898200   | -7.73392300  | -3.17740200 |
| H | 4.73018600   | -6.07586500  | -3.76210800 |
| H | 6.15379000   | -7.12093500  | -3.62795000 |
| H | 5.50803800   | -8.37549400  | -0.86185800 |
| H | 6.29716800   | -7.14585500  | 0.12977300  |
| H | 7.08126400   | -7.73688600  | -1.34444000 |
| H | 0.41376400   | -11.08613100 | -0.55353400 |
| H | -5.98506800  | -9.29588100  | 0.76468700  |
| H | -9.80726100  | 5.12980800   | -1.75918400 |
| H | -5.59439600  | 9.35068500   | 1.46355200  |
| C | -7.78015000  | -2.74426100  | 2.69976400  |
| C | -7.76620800  | -2.22622700  | 4.14902700  |
| H | -8.76737600  | -1.89749500  | 4.44491100  |
| H | -7.44687300  | -3.01029500  | 4.84136300  |
| H | -7.08884600  | -1.37755500  | 4.27064100  |
| C | -8.23881400  | -1.61604600  | 1.75872400  |
| H | -7.57744400  | -0.74786100  | 1.80683700  |
| H | -8.25960300  | -1.95898400  | 0.72030000  |
| H | -9.24585400  | -1.28261600  | 2.02835900  |
| C | -8.80117600  | -3.88430900  | 2.61110600  |
| H | -8.55058200  | -4.70888800  | 3.28467200  |
| H | -9.78907600  | -3.51393700  | 2.89807500  |
| H | -8.88055400  | -4.28139000  | 1.59499400  |
| C | -7.92332800  | -1.38988200  | -3.68638600 |
| C | -7.45868800  | -1.75796300  | -5.10692600 |
| H | -8.12490200  | -2.50978700  | -5.54141400 |
| H | -7.46373900  | -0.88056900  | -5.75974500 |
| H | -6.44671500  | -2.17010000  | -5.11060200 |
| C | -9.37029700  | -0.89061600  | -3.77328000 |
| H | -9.45906000  | -0.00955000  | -4.41537800 |
| H | -10.00290100 | -1.67372900  | -4.20001000 |
| H | -9.77484900  | -0.64107500  | -2.78819700 |
| C | -7.90288200  | -2.64833300  | -2.80080500 |
| H | -6.90174000  | -3.07882800  | -2.72470500 |
| H | -8.24306200  | -2.41673100  | -1.78730900 |
| H | -8.56505300  | -3.41514300  | -3.21501200 |

|                                              |                             |
|----------------------------------------------|-----------------------------|
| Zero-point correction=                       | 2.108276 (Hartree/Particle) |
| Thermal correction to Energy=                | 2.221509                    |
| Thermal correction to Enthalpy=              | 2.222453                    |
| Thermal correction to Gibbs Free Energy=     | 1.961811                    |
| Sum of electronic and zero-point Energies=   | -5736.055601                |
| Sum of electronic and thermal Energies=      | -5735.942368                |
| Sum of electronic and thermal Enthalpies=    | -5735.941424                |
| Sum of electronic and thermal Free Energies= | -5736.202066                |

(M,M,P)-1

|   |             |             |             |
|---|-------------|-------------|-------------|
| C | -3.63999300 | 1.31831600  | -0.04216600 |
| C | -3.84547900 | -0.06562000 | 0.00515000  |
| C | -5.15949400 | -0.56211600 | 0.10421900  |
| C | -6.28726200 | 0.27396100  | -0.08004600 |
| C | -6.07974900 | 1.68173600  | -0.21106500 |
| C | -4.75563500 | 2.18435100  | -0.05999800 |
| C | -7.59720200 | -0.40784800 | -0.00092700 |
| C | -8.74983800 | 0.00973500  | -0.68987800 |

|   |              |             |             |
|---|--------------|-------------|-------------|
| C | -8.77644200  | 1.14434800  | -1.64111300 |
| C | -8.33026000  | 2.46267700  | -1.13612000 |
| C | -7.13395600  | 2.69783900  | -0.42455100 |
| C | -9.24271400  | 3.47784800  | -1.40306300 |
| C | -9.02765300  | 4.76292900  | -0.93693100 |
| C | -7.85802500  | 5.02962300  | -0.25916700 |
| C | -6.89882600  | 4.03687100  | -0.02245900 |
| C | -7.70519000  | -1.61881200 | 0.73356000  |
| C | -8.95407000  | -2.22875500 | 0.89681800  |
| C | -10.08725800 | -1.74358500 | 0.27659400  |
| C | -9.96596500  | -0.65339100 | -0.56743800 |
| C | -4.51293100  | 3.57210000  | 0.26893400  |
| C | -5.28617200  | -1.92003900 | 0.58270200  |
| C | -2.72749600  | -0.98020300 | -0.10370900 |
| C | -2.29095000  | 1.83341000  | 0.04210600  |
| C | -5.60116500  | 4.42998100  | 0.51755500  |
| C | -5.39653200  | 5.63345300  | 1.18159200  |
| C | -4.12372700  | 6.05669400  | 1.56889000  |
| C | -3.04830800  | 5.26513400  | 1.19511200  |
| C | -3.20920500  | 4.05085700  | 0.51466500  |
| C | -4.16933800  | -2.77140900 | 0.65218400  |
| C | -4.22185400  | -3.88361900 | 1.49856500  |
| C | -5.36597400  | -4.20989100 | 2.21768000  |
| C | -6.51352300  | -3.44687100 | 1.99035900  |
| C | -6.50126100  | -2.33388900 | 1.15624800  |
| C | -1.44291900  | -0.45874700 | -0.34999100 |
| C | -0.45254400  | -1.31016900 | -0.88388500 |
| C | -0.65785000  | -2.70708500 | -0.83427000 |
| C | -1.92416900  | -3.24813700 | -0.49108500 |
| C | -2.93738200  | -2.37423500 | -0.04296400 |
| C | -2.05989900  | 3.21446100  | 0.18397600  |
| C | -0.72274400  | 3.67838900  | 0.08583500  |
| C | 0.30512400   | 2.77448900  | 0.43362400  |
| C | 0.02059600   | 1.39645700  | 0.57601100  |
| C | -1.20604700  | 0.92645300  | 0.05893800  |
| C | 1.66014800   | 3.24804600  | 0.61934600  |
| C | 0.47717200   | -3.59061400 | -1.01421400 |
| C | 1.98713600   | 4.59011500  | 0.33136600  |
| C | 3.31774800   | 5.04405600  | 0.47627400  |
| C | 4.31638700   | 4.16235800  | 0.94565800  |
| C | 3.98363900   | 2.82506300  | 1.25632100  |
| C | 2.66238400   | 2.36511100  | 1.07437500  |
| C | 1.75652700   | -3.06014400 | -1.26997900 |
| C | 2.88493200   | -3.90262900 | -1.30302300 |
| C | 2.74129900   | -5.28293600 | -1.05785800 |
| C | 1.45291000   | -5.82954000 | -0.88216500 |
| C | 0.32705100   | -4.98182100 | -0.85464100 |
| C | 0.97807800   | 5.46331000  | -0.21333300 |
| C | 3.65099500   | 6.41263500  | 0.15073500  |
| C | 5.67793000   | 4.62203200  | 1.10258400  |
| C | 4.99475400   | 1.92338400  | 1.75790400  |
| C | 2.30697500   | 1.01887800  | 1.44992000  |
| C | 1.88464300   | -1.66912800 | -1.61188800 |
| C | 4.18294300   | -3.35054800 | -1.60327100 |
| C | 3.90833800   | -6.12765700 | -0.97979900 |
| C | 1.28279600   | -7.25592100 | -0.74440000 |
| C | -0.99816700  | -5.53665100 | -0.77743300 |
| C | 3.25317600   | 0.17782800  | 2.07669000  |
| C | 2.82441000   | -1.01980000 | 2.63965800  |
| C | 1.49180700   | -1.42763100 | 2.60675400  |
| C | 0.59737600   | -0.63489000 | 1.90238900  |
| C | 0.98759000   | 0.55578400  | 1.27763800  |
| C | 0.76474700   | -0.82111100 | -1.53829500 |
| C | 0.81145300   | 0.41561000  | -2.19120000 |
| C | 1.96071300   | 0.86695100  | -2.82926200 |
| C | 3.10849100   | 0.07924500  | -2.73108800 |
| C | 3.10208700   | -1.17257200 | -2.12523800 |
| C | 6.33554800   | 2.34429000  | 1.87443800  |
| C | 7.30010000   | 1.43626800  | 2.32359400  |
| C | 6.98743200   | 0.12918200  | 2.66890500  |

|   |              |             |             |
|---|--------------|-------------|-------------|
| C | 5.65360700   | -0.25902400 | 2.57205300  |
| C | 4.65219100   | 0.60544100  | 2.14251300  |
| C | 6.00924900   | 5.96801000  | 0.81126200  |
| C | 7.33421100   | 6.38462100  | 0.94940200  |
| C | 7.99536000   | 4.19564300  | 1.66578700  |
| C | 6.68616000   | 3.72753500  | 1.54205400  |
| C | 2.66031600   | 7.28274000  | -0.36620600 |
| C | 2.98336700   | 8.62030100  | -0.59353700 |
| C | 5.24453200   | 8.23544600  | 0.10165100  |
| C | 4.96744800   | 6.88987300  | 0.35373500  |
| C | -0.34418400  | 5.00411700  | -0.39810200 |
| C | -1.23166700  | 5.77693400  | -1.15811300 |
| C | -0.88907600  | 7.02438200  | -1.65611400 |
| C | 0.38422200   | 7.51005200  | -1.35813400 |
| C | 1.32009000   | 6.76481300  | -0.64786400 |
| C | -1.18344500  | -6.93410300 | -0.86590200 |
| C | -2.46472800  | -7.42724700 | -1.09503400 |
| C | -3.57154800  | -6.58827800 | -1.22556900 |
| C | -3.38037600  | -5.22829300 | -1.01313700 |
| C | -2.12230200  | -4.68646800 | -0.72909700 |
| C | 2.41732000   | -8.09552900 | -0.64445600 |
| C | 2.22366400   | -9.47233300 | -0.51390300 |
| C | -0.16013700  | -9.19330700 | -0.58221800 |
| C | -0.01884200  | -7.81428600 | -0.73443100 |
| C | 5.20074700   | -5.56530900 | -1.13144100 |
| C | 6.31403600   | -6.38307900 | -0.93108500 |
| C | 4.90602600   | -8.28303200 | -0.51565900 |
| C | 3.76016700   | -7.50917400 | -0.70487500 |
| C | 4.30509400   | -2.00357000 | -2.01908000 |
| C | 5.56844500   | -1.49517400 | -2.29989800 |
| C | 6.72382400   | -2.26895800 | -2.20656800 |
| C | 6.58156400   | -3.59480200 | -1.81848200 |
| C | 5.33696200   | -4.15554900 | -1.51316500 |
| C | -5.39589400  | -5.34522800 | 3.24826600  |
| C | -6.57088100  | -6.29706200 | 2.96339700  |
| C | -5.57473200  | -4.73158500 | 4.64898500  |
| C | -4.10193900  | -6.16820400 | 3.24033600  |
| C | -3.96173000  | 7.34332500  | 2.38673300  |
| C | -2.48895800  | 7.70529900  | 2.61063800  |
| C | -4.63077200  | 7.14885000  | 3.75939500  |
| C | -4.63765200  | 8.51773900  | 1.65730400  |
| C | -1.83575200  | 7.85646700  | -2.52958900 |
| C | -2.03505100  | 9.24723300  | -1.90181600 |
| C | -3.21274400  | 7.19968200  | -2.68126800 |
| C | -1.21757300  | 8.01695800  | -3.93015800 |
| C | -4.93051100  | -7.17948300 | -1.62232200 |
| C | -6.05009700  | -6.13192700 | -1.59775900 |
| C | -5.31451300  | -8.31418700 | -0.65681700 |
| C | -4.82714600  | -7.74638000 | -3.05003200 |
| C | 1.07165900   | -2.69913000 | 3.35503700  |
| C | -0.42532600  | -2.99484000 | 3.20745000  |
| C | 1.85714200   | -3.90443900 | 2.80892500  |
| C | 1.37971400   | -2.52649600 | 4.85368200  |
| C | 2.00520700   | 2.16097200  | -3.65207400 |
| C | 2.31628400   | 1.80594800  | -5.11795700 |
| C | 0.67387000   | 2.91939800  | -3.61723000 |
| C | 3.10543500   | 3.09051500  | -3.11141300 |
| H | -10.12076300 | 3.23081700  | -1.98728300 |
| H | -9.74457800  | 5.55243200  | -1.13420700 |
| H | -7.64650400  | 6.04815400  | 0.03985300  |
| H | -9.02388200  | -3.14638200 | 1.46697700  |
| H | -11.04025000 | -2.24655600 | 0.39945100  |
| H | -10.80582700 | -0.29940000 | -1.15324300 |
| H | -6.25347600  | 6.24265200  | 1.43974100  |
| H | -2.04509800  | 5.56842500  | 1.45390200  |
| H | -3.32841000  | -4.48022700 | 1.60893200  |
| H | -7.42937900  | -3.71258500 | 2.50284100  |
| H | 3.53758800   | -1.63634000 | 3.17022900  |
| H | -0.44257300  | -0.91941700 | 1.85666700  |
| H | -0.08767600  | 1.01346300  | -2.22352600 |

|   |             |              |             |
|---|-------------|--------------|-------------|
| H | 4.02029500  | 0.43469800   | -3.19320300 |
| H | 8.32614300  | 1.75977300   | 2.40452800  |
| H | 5.39330800  | -1.27800000  | 2.82472700  |
| H | 7.61621300  | 7.40276800   | 0.71780800  |
| H | 8.78476600  | 3.53538800   | 1.99836300  |
| H | 2.22703100  | 9.31239100   | -0.94039700 |
| H | 6.23600000  | 8.63242600   | 0.27276900  |
| H | -2.20641700 | 5.36740600   | -1.37244700 |
| H | 0.66763900  | 8.48114800   | -1.74159200 |
| H | -2.59989300 | -8.49180000  | -1.23637200 |
| H | -4.22117000 | -4.55676200  | -1.08780900 |
| H | 3.07206200  | -10.14116000 | -0.45190000 |
| H | -1.14636700 | -9.63712700  | -0.53024000 |
| H | 7.31337300  | -5.97478000  | -1.00658700 |
| H | 4.82361800  | -9.33437200  | -0.27291100 |
| H | 5.66132400  | -0.45569700  | -2.58560900 |
| H | 7.46210000  | -4.21720800  | -1.76514800 |
| H | -6.49548700 | -6.73053500  | 1.96261500  |
| H | -7.53779200 | -5.79353000  | 3.03669700  |
| H | -6.57449900 | -7.11645300  | 3.68852300  |
| H | -4.74789800 | -4.05706800  | 4.88810300  |
| H | -5.60390000 | -5.51814800  | 5.40974200  |
| H | -6.50354000 | -4.15940400  | 4.72064600  |
| H | -3.23369800 | -5.56357400  | 3.51674000  |
| H | -3.90770100 | -6.61386400  | 2.26038100  |
| H | -4.17973800 | -6.98034800  | 3.96826000  |
| H | -1.95693300 | 7.84748000   | 1.66549600  |
| H | -1.96367500 | 6.93766700   | 3.18529500  |
| H | -2.42286900 | 8.63943600   | 3.17510300  |
| H | -5.69567100 | 6.92230500   | 3.66083500  |
| H | -4.16383800 | 6.32612400   | 4.30788000  |
| H | -4.53506500 | 8.05751400   | 4.36203400  |
| H | -5.70942000 | 8.35516000   | 1.51977000  |
| H | -4.19445600 | 8.67578300   | 0.67008300  |
| H | -4.51701000 | 9.43942400   | 2.23456400  |
| H | -1.09554700 | 9.79866700   | -1.81597500 |
| H | -2.46680900 | 9.16801000   | -0.90007100 |
| H | -2.71332400 | 9.84588300   | -2.51744100 |
| H | -3.14867800 | 6.23008900   | -3.18264000 |
| H | -3.70250300 | 7.05150200   | -1.71447400 |
| H | -3.85924200 | 7.83938300   | -3.28831200 |
| H | -1.06776300 | 7.04277900   | -4.40391200 |
| H | -0.24831200 | 8.52085400   | -3.89005800 |
| H | -1.87691300 | 8.60975500   | -4.57194800 |
| H | -5.87457900 | -5.33016100  | -2.32014000 |
| H | -6.16543300 | -5.67962100  | -0.60853200 |
| H | -6.99991200 | -6.60520100  | -1.86166200 |
| H | -6.29092500 | -8.72619900  | -0.92920500 |
| H | -4.59487300 | -9.13609000  | -0.67912000 |
| H | -5.37457000 | -7.95201700  | 0.37308900  |
| H | -4.06704400 | -8.52905600  | -3.11866700 |
| H | -4.56261500 | -6.96096900  | -3.76333500 |
| H | -5.78412700 | -8.17868900  | -3.35900700 |
| H | -1.04234400 | -2.18829500  | 3.61380300  |
| H | -0.67155600 | -3.90750100  | 3.75808600  |
| H | -0.70781000 | -3.15055400  | 2.16326500  |
| H | 2.93604700  | -3.77631900  | 2.92732600  |
| H | 1.57171900  | -4.81489600  | 3.34513800  |
| H | 1.65353400  | -4.05829800  | 1.74639400  |
| H | 2.44407200  | -2.35589500  | 5.03393100  |
| H | 0.83051200  | -1.67761800  | 5.27077400  |
| H | 1.08846500  | -3.42538500  | 5.40615400  |
| H | 1.54464600  | 1.15239400   | -5.53467000 |
| H | 2.35865200  | 2.71439000   | -5.72711700 |
| H | 3.27639900  | 1.29299400   | -5.21651100 |
| H | 0.39794700  | 3.21345700   | -2.60188000 |
| H | -0.14254200 | 2.32601400   | -4.03893300 |
| H | 0.75775300  | 3.83302400   | -4.21231100 |
| H | 2.91922700  | 3.35584600   | -2.06843400 |
| H | 4.09515000  | 2.63059400   | -3.16865800 |

|   |             |              |             |
|---|-------------|--------------|-------------|
| H | 3.13794900  | 4.01475100   | -3.69651600 |
| C | 8.08065100  | -1.64840500  | -2.56332200 |
| C | 8.30174100  | -0.36007200  | -1.75072200 |
| C | 9.24937300  | -2.59852700  | -2.27685100 |
| C | 8.09264900  | -1.30616900  | -4.06435000 |
| H | 7.54499300  | 0.39779200   | -1.96480900 |
| H | 8.27263200  | -0.55805900  | -0.67582100 |
| H | 9.27739200  | 0.07304800   | -1.99196500 |
| H | 9.19281900  | -3.50949100  | -2.87929400 |
| H | 10.19288800 | -2.10357500  | -2.52241700 |
| H | 9.28966700  | -2.88599900  | -1.22197800 |
| H | 9.04904600  | -0.85403300  | -4.34576300 |
| H | 7.94828100  | -2.20432700  | -4.67141400 |
| H | 7.29954300  | -0.59922100  | -4.32096000 |
| C | 8.03470800  | -0.87279300  | 3.17143800  |
| C | 8.01885200  | -2.13435200  | 2.29022700  |
| C | 9.45388500  | -0.29351700  | 3.14823400  |
| C | 7.69810700  | -1.26487400  | 4.62181200  |
| H | 7.04463400  | -2.62810200  | 2.29419700  |
| H | 8.26164400  | -1.89240900  | 1.25185000  |
| H | 8.75749500  | -2.85619800  | 2.65256500  |
| H | 9.55026000  | 0.57663700   | 3.80380100  |
| H | 10.16380900 | -1.04754000  | 3.49886800  |
| H | 9.75553100  | 0.00107300   | 2.13878500  |
| H | 8.43344300  | -1.98009400  | 5.00367500  |
| H | 7.70391400  | -0.38818800  | 5.27552400  |
| H | 6.71156400  | -1.72927300  | 4.69586100  |
| C | 0.95046300  | -10.01279900 | -0.47268300 |
| H | 0.82247600  | -11.08401600 | -0.35746000 |
| C | 6.16731300  | -7.72245400  | -0.61542000 |
| H | 7.04581500  | -8.33760500  | -0.45092100 |
| C | 8.31636500  | 5.50768900   | 1.37055800  |
| C | 4.26094300  | 9.09386100   | -0.35336700 |
| H | 4.49216300  | 10.14004200  | -0.52400000 |
| H | 9.34123000  | 5.84966300   | 1.46971900  |
| O | -9.34947900 | 1.04053000   | -2.71040000 |

|                                              |                             |
|----------------------------------------------|-----------------------------|
| Zero-point correction=                       | 2.108405 (Hartree/Particle) |
| Thermal correction to Energy=                | 2.221477                    |
| Thermal correction to Enthalpy=              | 2.222421                    |
| Thermal correction to Gibbs Free Energy=     | 1.963624                    |
| Sum of electronic and zero-point Energies=   | -5736.060894                |
| Sum of electronic and thermal Energies=      | -5735.947822                |
| Sum of electronic and thermal Enthalpies=    | -5735.946878                |
| Sum of electronic and thermal Free Energies= | -5736.205675                |

(P,M,P)-1

|   |            |             |             |
|---|------------|-------------|-------------|
| C | 3.24715500 | 1.83886900  | 0.06341600  |
| C | 3.70045300 | 0.57586400  | -0.30093800 |
| C | 5.06385200 | 0.39584600  | -0.63110100 |
| C | 5.98942500 | 1.48176000  | -0.61507200 |
| C | 5.55812700 | 2.70216600  | 0.03584500  |
| C | 4.18532200 | 2.84996100  | 0.33570100  |
| C | 7.30814300 | 1.23100900  | -1.24902800 |
| C | 8.27729500 | 2.22611600  | -1.54415500 |
| C | 8.18687200 | 3.66737900  | -1.22979200 |
| C | 7.70580200 | 4.09440300  | 0.09713700  |
| C | 6.42359200 | 3.77491000  | 0.57440100  |
| C | 8.55665200 | 4.96962600  | 0.76072000  |
| C | 8.16513200 | 5.54881600  | 1.95505000  |
| C | 6.85751500 | 5.38361100  | 2.36177000  |
| C | 5.95441700 | 4.58386800  | 1.65100900  |
| C | 7.62753100 | -0.07185700 | -1.73260100 |
| C | 8.90066500 | -0.34996800 | -2.25238900 |
| C | 9.83805600 | 0.63088400  | -2.46505700 |
| C | 9.49003600 | 1.93274100  | -2.15932900 |
| C | 3.66110200 | 3.97489100  | 1.07723200  |
| C | 5.41926200 | -0.93077600 | -1.08448200 |



|   |             |             |             |
|---|-------------|-------------|-------------|
| C | 2.77049300  | -0.53102300 | -0.18038000 |
| C | 1.82727500  | 2.11171900  | 0.07540800  |
| O | 8.67437600  | 4.49766200  | -1.97766800 |
| C | 4.52043300  | 4.71121300  | 1.90018900  |
| C | 3.97625300  | 5.59547100  | 2.83779100  |
| C | 2.60581100  | 5.79255100  | 2.95027400  |
| C | 1.77673100  | 5.13562700  | 2.03907200  |
| C | 2.27553800  | 4.24563700  | 1.09289500  |
| C | 4.51788700  | -2.01381800 | -0.95993200 |
| C | 4.76012200  | -3.18678200 | -1.67620500 |
| C | 5.90930700  | -3.36787800 | -2.43522400 |
| C | 6.85788700  | -2.35186700 | -2.40694200 |
| C | 6.64542400  | -1.14958700 | -1.72848400 |
| C | 1.41082200  | -0.27676900 | 0.10192000  |
| C | 0.62568400  | -1.30596700 | 0.66541200  |
| C | 1.14069500  | -2.62527100 | 0.68120400  |
| C | 2.49036900  | -2.88786800 | 0.33631500  |
| C | 3.26632300  | -1.84562500 | -0.21244300 |
| C | 1.38035700  | 3.43317200  | 0.25243800  |
| C | 0.10158900  | 3.78827600  | -0.21369800 |
| C | -0.77732500 | 2.76026600  | -0.65252200 |
| C | -0.34484500 | 1.41403500  | -0.73535700 |
| C | 0.92519900  | 1.07640900  | -0.21813600 |
| C | -2.17058800 | 3.07472300  | -0.90637800 |
| C | 0.24852000  | -3.73557700 | 0.95499100  |
| C | -2.64792500 | 4.38982900  | -0.72694300 |
| C | -4.02381500 | 4.67567700  | -0.85158800 |
| C | -4.93255000 | 3.64137400  | -1.15542500 |
| C | -4.45034300 | 2.34044200  | -1.41162100 |
| C | -3.07585800 | 2.05647300  | -1.27351800 |
| C | -1.11534800 | -3.50291500 | 1.21813500  |
| C | -2.00873100 | -4.58454900 | 1.35551200  |
| C | -1.54438000 | -5.90763000 | 1.20885800  |
| C | -0.16707700 | -6.14651700 | 1.02688800  |
| C | 0.72234300  | -5.06154700 | 0.89607200  |
| C | -1.70613900 | 5.45981500  | -0.52488100 |
| C | -4.49737100 | 6.03004000  | -0.68147400 |
| C | -6.35134400 | 3.90957700  | -1.19314900 |
| C | -5.35777300 | 1.30559300  | -1.84555800 |
| C | -2.57375000 | 0.74895300  | -1.60446400 |
| C | -1.56137100 | -2.15827300 | 1.47221600  |
| C | -3.39261300 | -4.33662100 | 1.67538200  |
| C | -2.47512800 | -7.00968800 | 1.24096500  |
| C | 0.33660200  | -7.49917000 | 0.99405700  |
| C | 2.14002400  | -5.29500000 | 0.82918100  |
| C | -3.42467400 | -0.21513000 | -2.19246300 |
| C | -2.86053500 | -1.37118300 | -2.72405100 |
| C | -1.48762800 | -1.60931000 | -2.70581000 |
| C | -0.68401200 | -0.69218200 | -2.04188600 |
| C | -1.20572900 | 0.45548500  | -1.43572000 |
| C | -0.66840400 | -1.07836700 | 1.32548000  |
| C | -0.99396800 | 0.14288000  | 1.92745500  |
| C | -2.21226500 | 0.35349800  | 2.56211900  |
| C | -3.14822100 | -0.67949600 | 2.52703200  |
| C | -2.85399000 | -1.92988800 | 1.99419800  |
| C | -6.74675200 | 1.55986800  | -1.91315000 |
| C | -7.59323800 | 0.56904400  | -2.40353100 |
| C | -7.12934100 | -0.68292300 | -2.79948400 |
| C | -5.76551700 | -0.92391200 | -2.69957400 |
| C | -4.86585500 | 0.04576300  | -2.24999200 |
| C | -6.83572300 | 5.20327200  | -0.88320300 |
| C | -8.21467400 | 5.40508300  | -0.80233800 |
| C | -9.10061200 | 4.36996300  | -1.04121300 |
| C | -8.62967100 | 3.11779800  | -1.39533500 |
| C | -7.26073600 | 2.86728600  | -1.49492400 |
| C | -3.57126200 | 7.09124800  | -0.53889300 |
| C | -4.04942100 | 8.38733400  | -0.34808400 |
| C | -5.40898300 | 8.64674200  | -0.33003200 |
| C | -6.31629900 | 7.61709600  | -0.50402400 |
| C | -5.88614000 | 6.29978700  | -0.67741500 |

|   |             |              |             |
|---|-------------|--------------|-------------|
| C | -0.33254600 | 5.17979600   | -0.38790700 |
| C | 0.58473700  | 6.22587100   | -0.53739700 |
| C | 0.18446600  | 7.54407900   | -0.71817500 |
| C | -1.18346400 | 7.81306400   | -0.68484100 |
| C | -2.13616900 | 6.80399200   | -0.57694900 |
| C | 2.65438600  | -6.59549100  | 1.02646600  |
| C | 4.01635400  | -6.74839200  | 1.26796700  |
| C | 4.89138000  | -5.66171600  | 1.30391000  |
| C | 4.37992200  | -4.41012700  | 0.98371300  |
| C | 3.02748600  | -4.21139900  | 0.68509100  |
| C | -0.56555100 | -8.58888100  | 0.99138700  |
| C | -0.05125100 | -9.88683400  | 0.95746700  |
| C | 1.31342600  | -10.11267200 | 0.91971700  |
| C | 2.19785300  | -9.04756700  | 0.93777200  |
| C | 1.73305100  | -7.73388800  | 0.99087200  |
| C | -3.85929000 | -6.76130200  | 1.41155400  |
| C | -4.75046400 | -7.83056500  | 1.30756600  |
| C | -4.29585900 | -9.11627800  | 1.07255600  |
| C | -2.93958500 | -9.36833500  | 0.96218500  |
| C | -2.00777900 | -8.33369100  | 1.05561400  |
| C | -3.82555500 | -3.02844800  | 1.99613300  |
| C | -5.16524700 | -2.81895400  | 2.30712100  |
| C | -6.09336000 | -3.85796600  | 2.35503000  |
| C | -5.64422500 | -5.13775900  | 2.05999500  |
| C | -4.31669800 | -5.40096300  | 1.70980400  |
| C | 6.13250500  | -4.60251200  | -3.31742500 |
| C | 7.51134100  | -5.22187200  | -3.03043100 |
| C | 6.07341600  | -4.17006100  | -4.79390300 |
| C | 5.06651300  | -5.68000000  | -3.08418600 |
| C | 1.98428800  | 6.69246500   | 4.02614100  |
| C | 1.24055500  | 7.85954700   | 3.35521200  |
| C | 0.99111200  | 5.86753300   | 4.86450400  |
| C | 3.03545900  | 7.27780300   | 4.97616000  |
| C | -8.11595800 | -1.71813600  | -3.35443300 |
| C | -7.44659700 | -3.06820300  | -3.63673200 |
| C | -8.70716300 | -1.18700800  | -4.67304300 |
| C | -9.25467400 | -1.95297800  | -2.34703800 |
| C | 1.18082600  | 8.67470500   | -1.00631400 |
| C | 0.90704400  | 9.88340000   | -0.09487100 |
| C | 2.63422200  | 8.23469500   | -0.79044400 |
| C | 1.01451600  | 9.10661800   | -2.47504000 |
| C | -7.55043200 | -3.55607600  | 2.72688500  |
| C | -8.41380600 | -4.82171400  | 2.78280200  |
| C | -8.15401100 | -2.60904000  | 1.67517900  |
| C | -7.60131100 | -2.88386600  | 4.11049800  |
| C | 6.35161100  | -5.87401500  | 1.72351200  |
| C | 7.19726700  | -4.60763800  | 1.54210200  |
| C | 6.98793600  | -6.99790800  | 0.88737100  |
| C | 6.38444500  | -6.27331300  | 3.21009600  |
| C | -0.92472400 | -2.84611200  | -3.41825500 |
| C | 0.60224800  | -2.93549500  | -3.31310700 |
| C | -1.52609700 | -4.11815600  | -2.79445700 |
| C | -1.29794500 | -2.78453200  | -4.91054500 |
| C | -2.55148200 | 1.64826100   | 3.31278000  |
| C | -2.82617900 | 1.31226700   | 4.79029100  |
| C | -1.40954700 | 2.66966300   | 3.26486700  |
| C | -3.80451900 | 2.29528500   | 2.69716300  |
| H | 9.52003000  | 5.18958300   | 0.31667600  |
| H | 8.84265500  | 6.18217300   | 2.51707500  |
| H | 6.51358600  | 5.92641600   | 3.23233000  |
| H | 9.15733600  | -1.37112900  | -2.49641000 |
| H | 10.81111800 | 0.39278000   | -2.88015000 |
| H | 10.16001200 | 2.75663000   | -2.36840200 |
| H | 4.63551800  | 6.13920800   | 3.49724300  |
| H | 0.70646300  | 5.29278600   | 2.08132100  |
| H | 4.00981700  | -3.96186500  | -1.64812800 |
| H | 7.75754100  | -2.47999900  | -2.99105000 |
| H | -3.49968400 | -2.09181000  | -3.21633500 |
| H | 0.38243900  | -0.84910600  | -2.01353700 |
| H | -0.25561400 | 0.92965700   | 1.92798700  |

|   |             |              |             |
|---|-------------|--------------|-------------|
| H | -4.11329800 | -0.51887200  | 2.98957600  |
| H | -8.64933300 | 0.78162200   | -2.50222500 |
| H | -5.38675700 | -1.89579000  | -2.97768400 |
| H | -8.61129600 | 6.37552800   | -0.53462600 |
| H | -9.34428800 | 2.32518700   | -1.57483200 |
| H | -3.35730300 | 9.20525200   | -0.19273800 |
| H | -7.37208300 | 7.85360400   | -0.51222500 |
| H | 1.63657100  | 5.98729400   | -0.53982400 |
| H | -1.51622100 | 8.83539800   | -0.80709400 |
| H | 4.40063300  | -7.73443900  | 1.49471800  |
| H | 5.03545600  | -3.55302400  | 0.97840600  |
| H | -0.71708600 | -10.73975400 | 0.97091400  |
| H | 3.26114300  | -9.24686900  | 0.89147400  |
| H | -5.81640300 | -7.66400000  | 1.39222600  |
| H | -2.61342900 | -10.38502600 | 0.78631200  |
| H | -5.50435100 | -1.81154800  | 2.51099300  |
| H | -6.34085400 | -5.96019700  | 2.11968400  |
| H | 7.60163600  | -5.51855900  | -1.98209600 |
| H | 8.32895000  | -4.53201100  | -3.25303200 |
| H | 7.65854600  | -6.11221400  | -3.64907400 |
| H | 5.09931800  | -3.73543400  | -5.03473300 |
| H | 6.23409600  | -5.03107200  | -5.45051400 |
| H | 6.83799800  | -3.42354300  | -5.02478900 |
| H | 4.06713900  | -5.32952200  | -3.35630700 |
| H | 5.03926300  | -6.00881400  | -2.04128300 |
| H | 5.28559800  | -6.55277400  | -3.70543100 |
| H | 0.75324200  | 8.48513900   | 4.10965600  |
| H | 0.47219800  | 7.51132600   | 2.66058600  |
| H | 1.93842800  | 8.48842500   | 2.79466500  |
| H | 1.49437600  | 5.02857000   | 5.35330900  |
| H | 0.54135500  | 6.49379700   | 5.64117000  |
| H | 0.18078300  | 5.46160600   | 4.25457400  |
| H | 3.59139700  | 6.49444600   | 5.49933800  |
| H | 2.54198500  | 7.89420100   | 5.73242100  |
| H | 3.75105800  | 7.91628400   | 4.45019500  |
| H | -7.00325800 | -3.49837300  | -2.73399600 |
| H | -6.66520000 | -2.98504500  | -4.39725700 |
| H | -8.19188400 | -3.77589300  | -4.00991900 |
| H | -9.23601700 | -0.24175800  | -4.52664200 |
| H | -7.92068900 | -1.01738200  | -5.41366000 |
| H | -9.41824300 | -1.90754700  | -5.08955500 |
| H | -9.81621200 | -1.03864400  | -2.14151000 |
| H | -8.86528000 | -2.32569300  | -1.39597600 |
| H | -9.96025100 | -2.69185000  | -2.73944600 |
| H | 0.99199400  | 9.61139500   | 0.96005700  |
| H | -0.08847500 | 10.30483400  | -0.25347200 |
| H | 1.63159400  | 10.67697800  | -0.30063500 |
| H | 2.80419200  | 7.87554900   | 0.22868100  |
| H | 2.92924700  | 7.44279400   | -1.48385800 |
| H | 3.30323700  | 9.08200100   | -0.96380400 |
| H | 1.21436200  | 8.27173900   | -3.15232900 |
| H | 0.00038300  | 9.46305600   | -2.67471700 |
| H | 1.71116200  | 9.91568900   | -2.71668800 |
| H | -8.04760600 | -5.53098500  | 3.53060400  |
| H | -8.45393300 | -5.33097600  | 1.81567400  |
| H | -9.43820500 | -4.55420200  | 3.05569900  |
| H | -7.60160600 | -1.66886300  | 1.60567200  |
| H | -8.14200600 | -3.07500700  | 0.68590200  |
| H | -9.19210200 | -2.37030800  | 1.92708500  |
| H | -7.04582400 | -1.94331800  | 4.12826300  |
| H | -7.17676100 | -3.53718100  | 4.87791400  |
| H | -8.63694000 | -2.66228400  | 4.38668200  |
| H | 6.84870100  | -3.79013400  | 2.17892900  |
| H | 7.19158500  | -4.25790900  | 0.50561700  |
| H | 8.23412400  | -4.81664400  | 1.81960900  |
| H | 8.03659900  | -7.12922500  | 1.17070000  |
| H | 6.48792900  | -7.95792200  | 1.03592200  |
| H | 6.95167000  | -6.76513900  | -0.18023400 |
| H | 5.82239400  | -7.19341200  | 3.39087000  |
| H | 5.94898600  | -5.48819400  | 3.83436800  |

|   |              |              |             |
|---|--------------|--------------|-------------|
| H | 7.41547200   | -6.43774800  | 3.53923400  |
| H | 1.09347700   | -2.07013900  | -3.76719900 |
| H | 0.95142900   | -3.82734200  | -3.84135900 |
| H | 0.93542600   | -3.01440200  | -2.27513800 |
| H | -2.61554400  | -4.13801400  | -2.88025000 |
| H | -1.13788900  | -5.00712600  | -3.30140000 |
| H | -1.27347800  | -4.19354800  | -1.73376200 |
| H | -2.38034000  | -2.76630900  | -5.05992100 |
| H | -0.88102000  | -1.88987100  | -5.38161600 |
| H | -0.90466700  | -3.66056800  | -5.43577800 |
| H | -1.94980800  | 0.85299200   | 5.25640700  |
| H | -3.06984700  | 2.22292200   | 5.34651300  |
| H | -3.66448000  | 0.62018500   | 4.90240900  |
| H | -1.17911200  | 2.97626600   | 2.24175500  |
| H | -0.49502500  | 2.28063600   | 3.72180100  |
| H | -1.70092000  | 3.56499200   | 3.82190800  |
| H | -3.63947000  | 2.55437700   | 1.64870000  |
| H | -4.67162500  | 1.63170000   | 2.74523300  |
| H | -4.05994100  | 3.21183300   | 3.23806500  |
| H | -10.16845900 | 4.54165800   | -0.95527000 |
| H | -5.76452600  | 9.66114300   | -0.18273400 |
| H | -5.00571300  | -9.93165000  | 0.98049900  |
| H | 1.69143800   | -11.12888900 | 0.88030600  |

|                                              |                             |
|----------------------------------------------|-----------------------------|
| Zero-point correction=                       | 2.108694 (Hartree/Particle) |
| Thermal correction to Energy=                | 2.221774                    |
| Thermal correction to Enthalpy=              | 2.222718                    |
| Thermal correction to Gibbs Free Energy=     | 1.963162                    |
| Sum of electronic and zero-point Energies=   | -5736.044078                |
| Sum of electronic and thermal Energies=      | -5735.930998                |
| Sum of electronic and thermal Enthalpies=    | -5735.930054                |
| Sum of electronic and thermal Free Energies= | -5736.189610                |

## Thin Films

Preliminary studies using the racemic superhelicene (*M,M,P/P,P,M*)-1 were conducted to obtain thin films on quartz plates as substrate by three different deposition techniques: home-made Langmuir-Blodgett-type, spin-coating and drop casting. Posterior optical and morphological examination of the deposited samples via optical (OM) and tapping-mode atomic force microscopy (AFM) was carried out to analyze the suitability of the conditions and deposition technique employed through the morphology inspection. Solutions of (*M,M,P/P,P,M*)-1 in  $\text{CHCl}_3$ /toluene mixtures ranging from 0 to 100% toluene were tested. While fast evaporation of mixtures containing  $\text{CHCl}_3$  led to amorphous material deposits using Langmuir-Blodgett and spin-coating, toluene-containing samples were not suitable for spin-coating deposition, due to the lack of solution/substrate interactions. Solutions ranging from 1 to 0.2  $\text{mg mL}^{-1}$  were too concentrated yielding amorphous materials. The best results in terms of thin film formation via drop casting were obtained for 0.1  $\text{mg mL}^{-1}$  solutions in pure toluene (Figure S43). For samples grown under these conditions, AFM revealed wide homogeneous areas of ca.  $100 \times 100 \mu\text{m}$  constituted by stacked flakes (ca.  $5 \mu\text{m}$ ) where height profiles of ca. 1.6 to 2.4 nm (coincident with superhelicene dimensions) hint at the presence of stacked monolayers (Figures S44-S46).

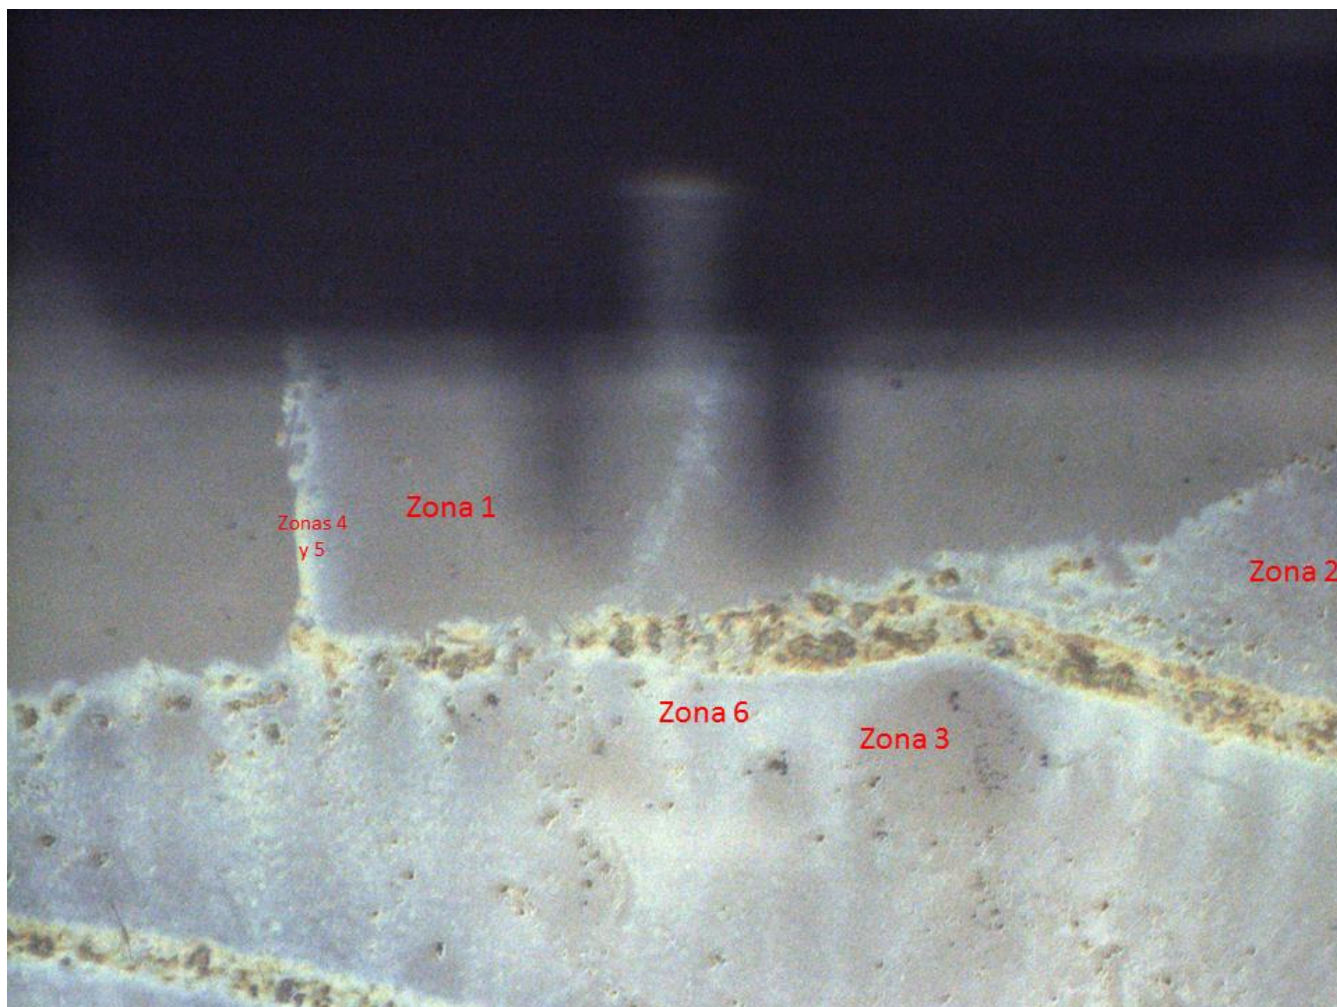

**Figure S43.** Optical Microscopy (coupled to AFM) of several zones to be explored by tapping-mode AFM of racemic (*P,P,M*)/(*M,M,P*)-1 thin films deposited on a quartz plate via drop casting (dark zones are sample-concentrated and brighter zones correspond to the ones bearing less amount of compound or lower thickness).  $c = 0.1 \text{ mg mL}^{-1}$ , solvent = toluene. Window size  $842 \times 631 \mu\text{m}^2$ .

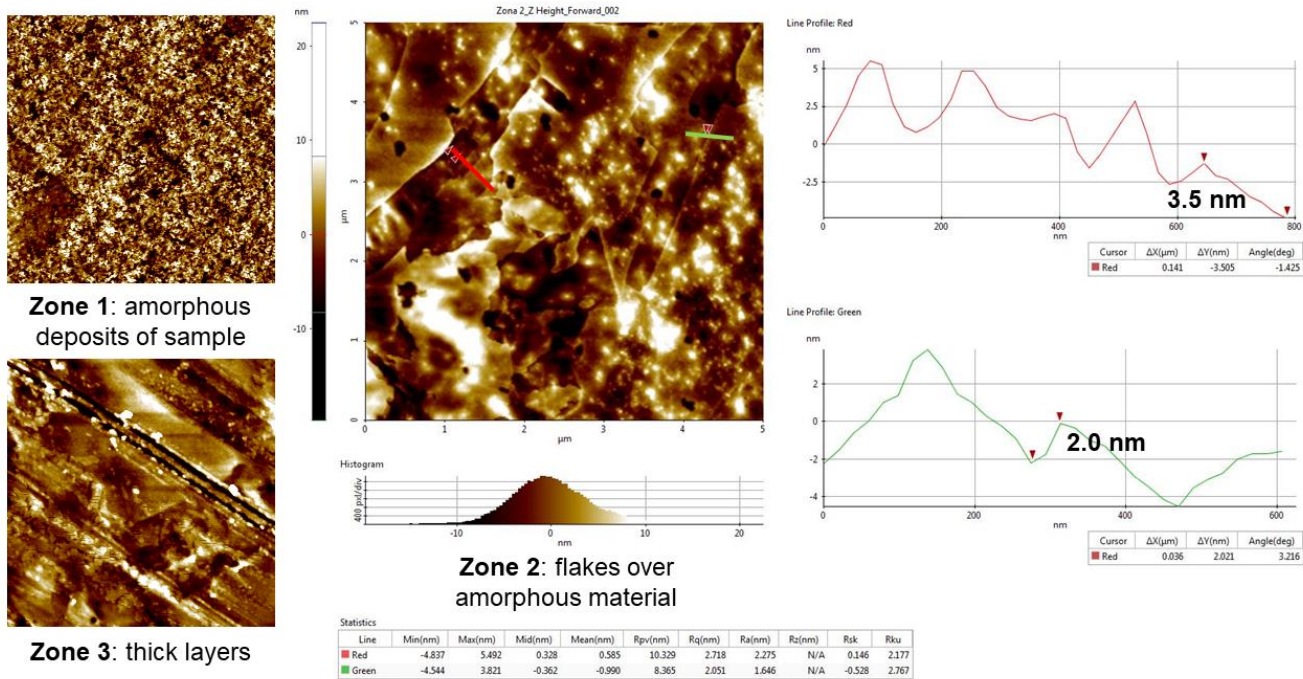

Figure S44. Tapping-mode AFM of racemic  $(P,P,M)/(M,M,P)$ -1 thin films from zones 1 to 3 with corresponding height.  $c = 0.1 \text{ mg mL}^{-1}$ , solvent = toluene, substrate = quartz plate.

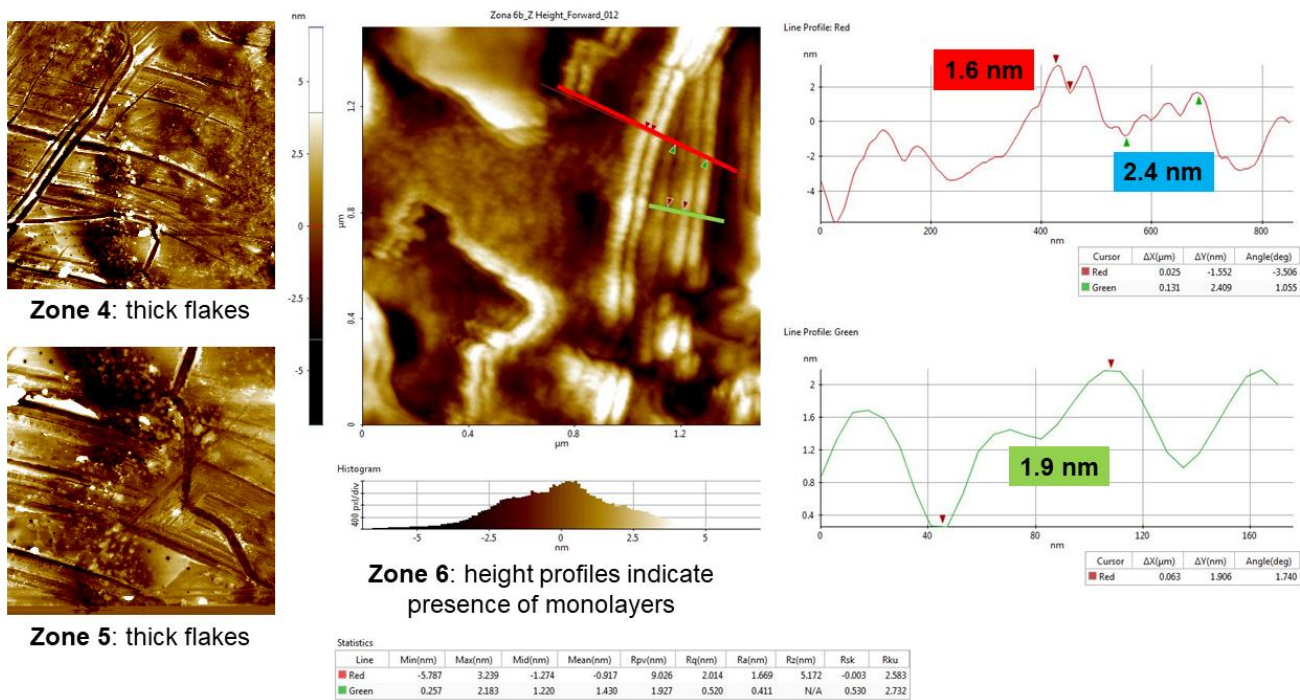

Figure S45. Tapping-mode AFM of racemic  $(P,P,M)/(M,M,P)$ -1 thin films from zones 4 to 6 with corresponding height.  $c = 0.1 \text{ mg mL}^{-1}$ , solvent = toluene, substrate = quartz plate.

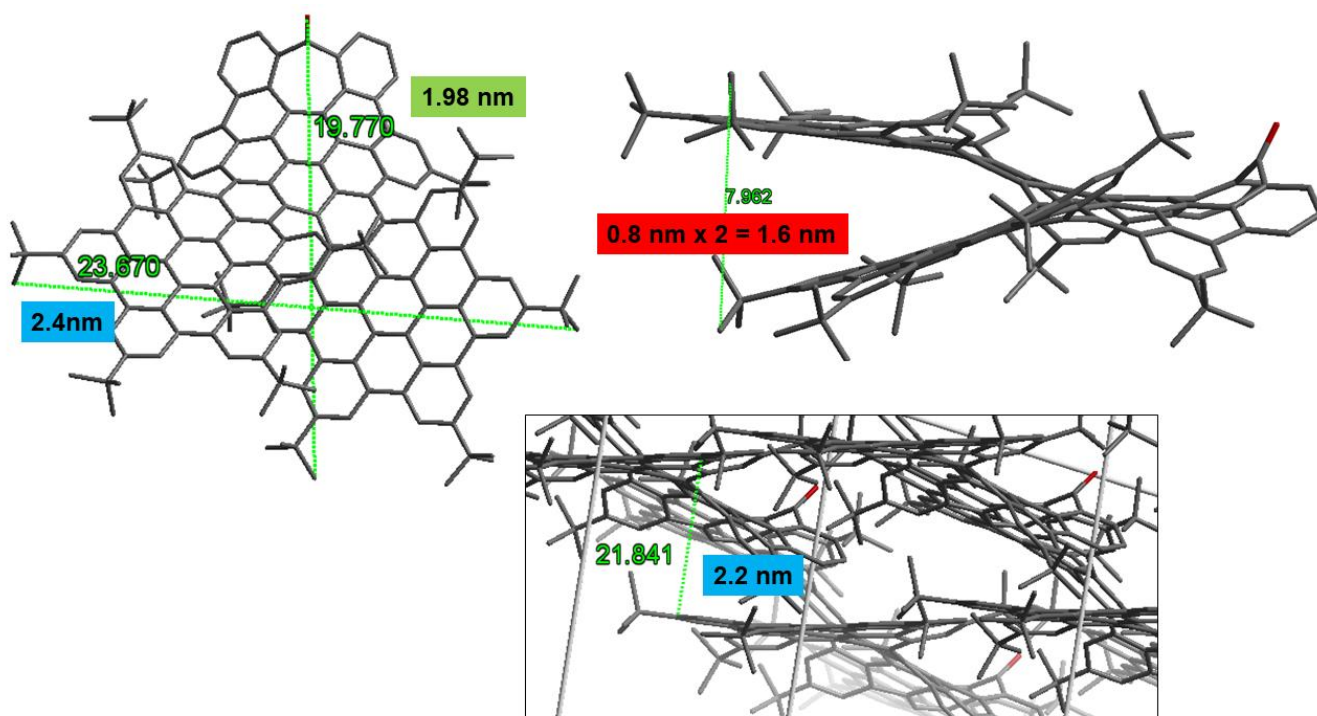

**Figure S46.** Racemic macrohelicene (*M,M,P/P,P,M*)-1 crystal with molecular dimensions (left), distance between terminal HBCs (right) and interlayer distance (bottom) (distances in green are displayed in Å).

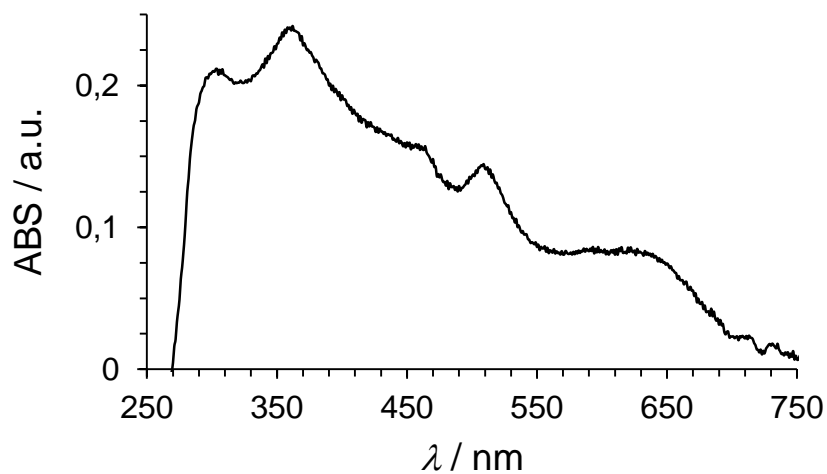

Figure S47. Absorption spectrum of enantiopure (*P,P,M*)-1 thin film formed via drop-casting from a chloroform solution (ca. 5 mg mL<sup>-1</sup>).

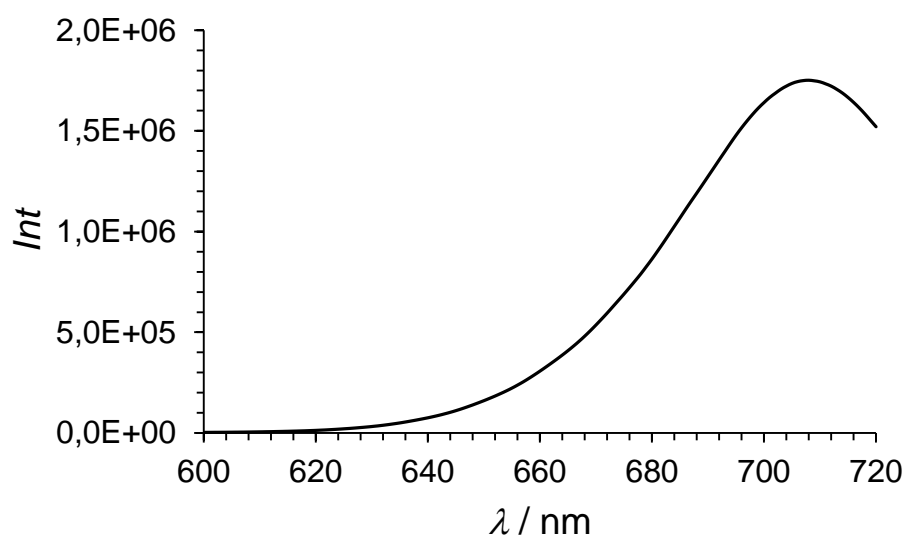

Figure S48. Emission spectrum of enantiopure (*P,P,M*)-1 thin film formed via drop-casting from a chloroform solution (ca. 5 mg mL<sup>-1</sup>).

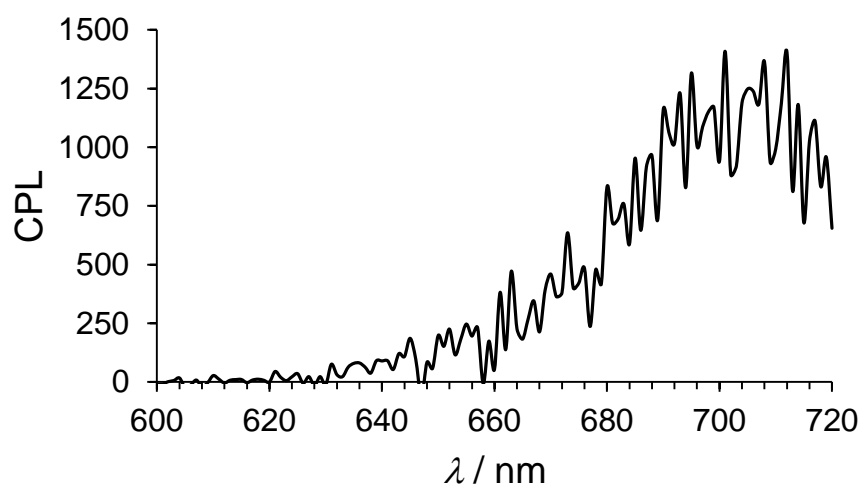

Figure S49. CPL spectrum of (*P,P,M*)-1 thin film formed via drop-casting from a chloroform solution (ca. 5 mg mL<sup>-1</sup>).



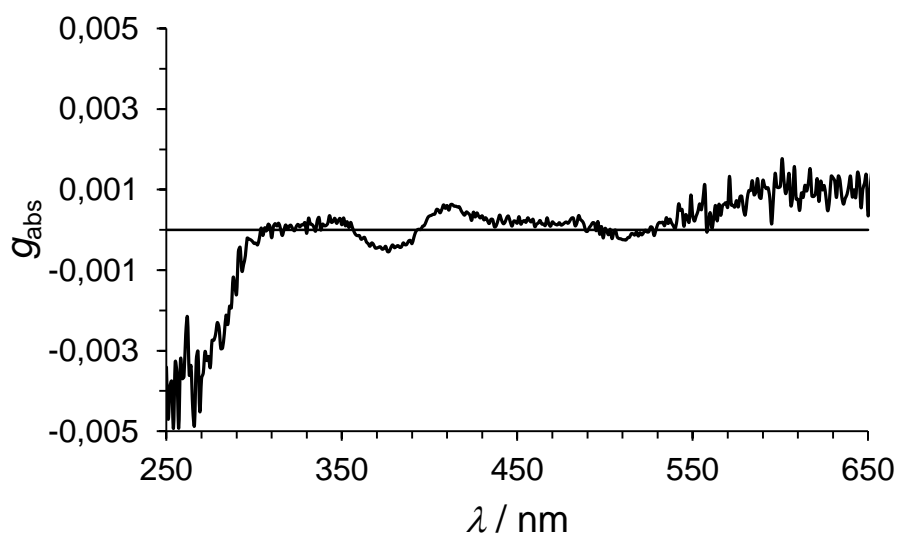

Figure S50. Absorption dissymmetry factor vs wavelength of  $(P,P,M)$ -1 thin film formed via drop-casting from a chloroform solution (ca.  $5 \text{ mg mL}^{-1}$ ).

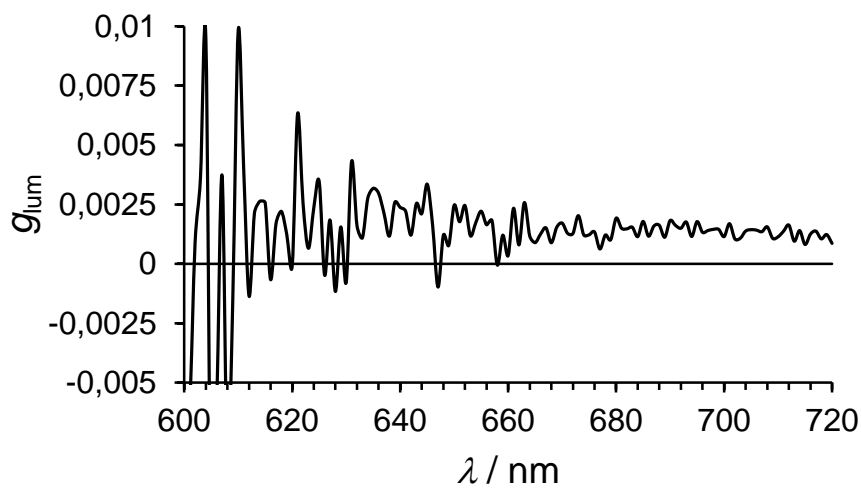

Figure S51. Emission dissymmetry factor vs wavelength of  $(P,P,M)$ -1 thin film formed via drop-casting from a chloroform solution (ca.  $5 \text{ mg mL}^{-1}$ ).

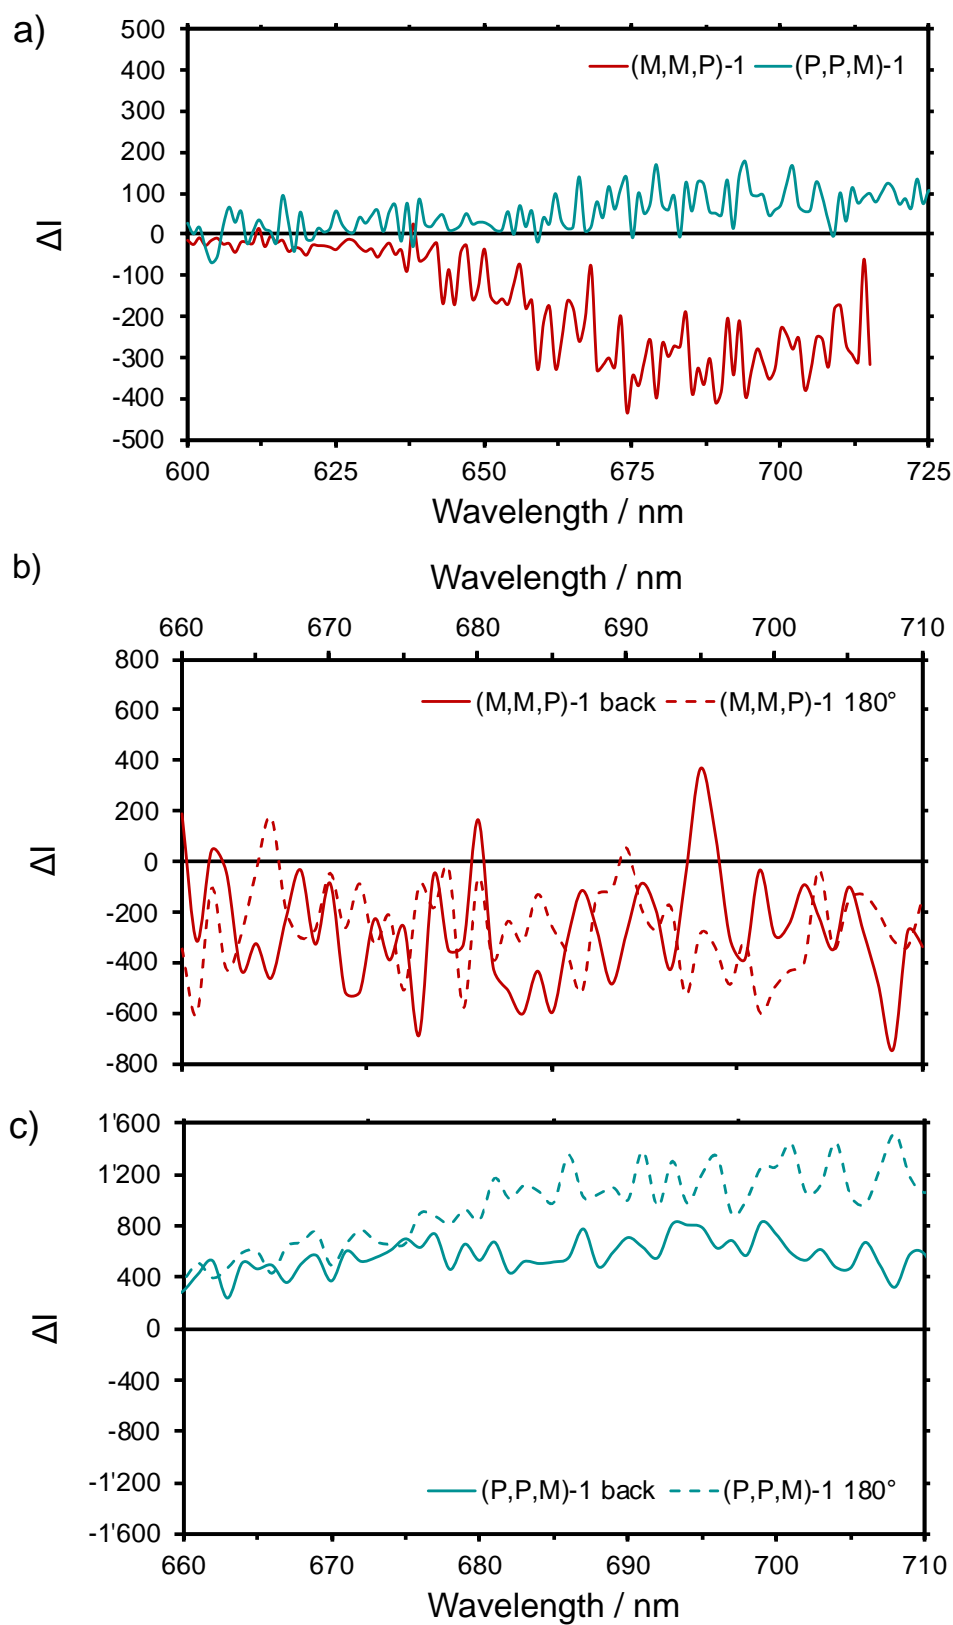

**Figure 52.** a) Experimental CPL spectra ( $\lambda_{exc} = 370$  nm) of (M,M,P)-1 (red) and (P,P,M)-1 (turquoise) on quartz substrates from  $\text{CHCl}_3$  solutions at ca.  $5 \text{ mg mL}^{-1}$ ; b) CPL spectra of (M,M,P)-1 film rotated at an angle of  $180^\circ$  (dashed line) and backside-flipped (solid line). c) CPL of (P,P,M)-1 film rotated at an angle of  $180^\circ$  (dashed line) and backside-flipped (solid line).

For the enantiopure films, given that the sample concentration to obtain a thickness enough for the detection of chiroptical responses are ca. fifty times higher than those used for AFM characterization of the racemate, neither flake structure nor hint of multilayers were found in the corresponding images (Figure S56).

a)

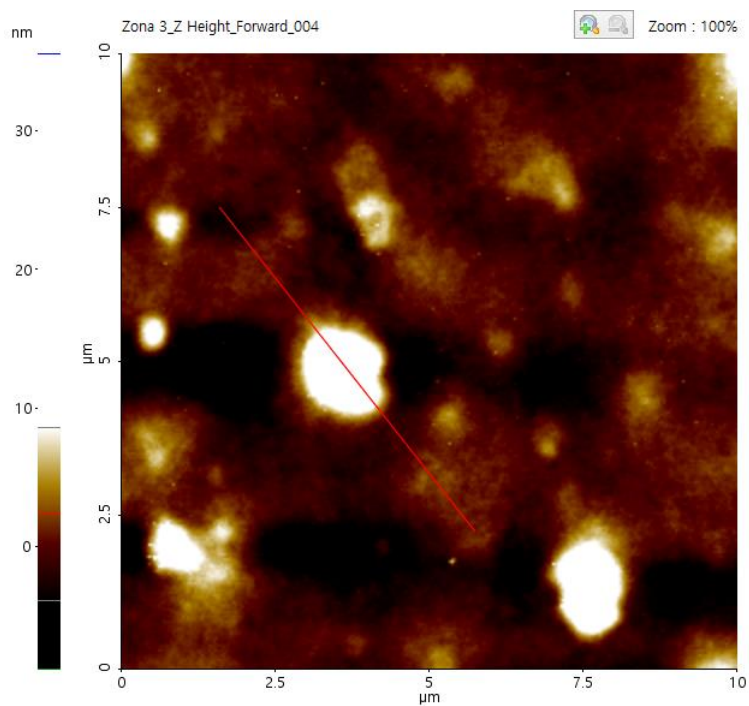

b)

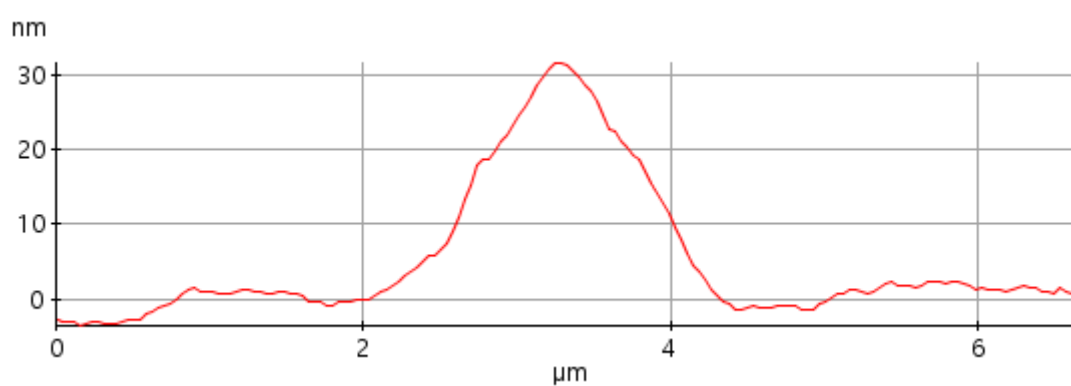

**Figure S53.** Non-contact mode AFM image (a) and height profile (b) of enantiopure (*P,P,M*)-1 thin film deposited on a quartz plate via drop-casting from a toluene solution (ca. 0.1 mg mL<sup>-1</sup>).

## References

- S1 M. J. Mio, L. C. Kopel, J. B. Braun, T. L. Gadzikwa, K. L. Hull, R. G. Brisbois, C. J. Markworth, P. A. Grieco, *Org. Lett.* **2002**, *4*, 3199–3202.
- S2 Q. Gao and S. Xu, *Org. Biomol. Chem.*, **2018**, *16*, 208-212.
- S3 G. M. Sheldrick, *Acta Cryst.*, **2008**, *A64*, 112-122.
- S4 G. M. Sheldrick, *Acta Cryst.*, **2015**, *A71*, 3-8.
- S5 L. J. Farrugia, *J. Appl. Cryst.*, **2012**, *45*, 849-854.
- S6 A. L. Spek, *Acta Cryst.*, **2015**, *C71*, 9-18.
- S7 A. L. Spek, *Acta Cryst.*, **2009**, *D65*, 148-155.
- S8 L. Porrès, A. Holland, L.-O. Pålsson, A. P. Monkman, C. Kemp, A. Beeby, *J. Fluoresc.* **2006**, *16*, 267-272.
- S9 N. S. Makarov, M. Drobizhev, and A. Rebane *Opt. Express* **2008**, *16*, 4029-4047.
- S10 C. Xu, W. W. Webb, *J. Opt. Soc. Am. B.*, **1996**, *13*, 481-491.
- S11 Gaussian 09, Revision C.01, M. J. Frisch, G. W. Trucks, H. B. Schlegel, G. E. Scuseria, M. A. Robb, J. R. Cheeseman, G. Scalmani, V. Barone, G. A. Petersson, H. Nakatsuji, X. Li, M. Caricato, A. Marenich, J. Bloino, B. G. Janesko, R. Gomperts, B. Mennucci, H. P. Hratchian, J. V. Ortiz, A. F. Izmaylov, J. L. Sonnenberg, D. Williams-Young, F. Ding, F. Lipparini, F. Egidi, J. Goings, B. Peng, A. Petrone, T. Henderson, D. Ranasinghe, V. G. Zakrzewski, J. Gao, N. Rega, G. Zheng, W. Liang, M. Hada, M. Ehara, K. Toyota, R. Fukuda, J. Hasegawa, M. Ishida, T. Nakajima, Y. Honda, O. Kitao, H. Nakai, T. Vreven, K. Throssell, J. A. Montgomery, Jr., J. E. Peralta, F. Ogliaro, M. Bearpark, J. J. Heyd, E. Brothers, K. N. Kudin, V. N. Staroverov, T. Keith, R. Kobayashi, J. Normand, K. Raghavachari, A. Rendell, J. C. Burant, S. S. Iyengar, J. Tomasi, M. Cossi, J. M. Millam, M. Klene, C. Adamo, R. Cammi, J. W. Ochterski, R. L. Martin, K. Morokuma, O. Farkas, J. B. Foresman, and D. J. Fox, Gaussian, Inc., Wallingford CT, 2016.
